# Supplementary material for: Highly NIR-emitting ytterbium complexes containing 2-(tosylaminobenzylidene)-N-benzoylhydrazone anions: structure in solution and use for bioimaging
Source: Royal Society of Chemistry journal article supplement (doi:10.1039/d0dt03913f), 2021-01-01
Supplement: d0dt03913f1.pdf [file d0dt03913f1.pdf]

**Highly NIR-emitting ytterbium complexes containing  
2-(tosylaminobenzylidene)-N-benzoylhydrazone anions: structure in solution and  
use for bioimaging**

**SUPPORTING INFORMATION**

*Anton D. Kovalenko<sup>a,b</sup>, Alexander A. Pavlov<sup>c</sup>, Ilya D. Ustinovich<sup>d</sup>, Alena S. Kalyakina<sup>e</sup>, Alexander S. Goloveshkin<sup>c</sup>, Łukasz Marciniak<sup>f</sup>, Leonid S. Lepnev<sup>g</sup>, Anatolii S. Burlov<sup>h</sup>, Ute Scheperh<sup>e,i</sup>, Stefan Bräse<sup>e,i</sup>,  
Valentina V. Utochnikova<sup>\*a,j</sup>*

# Table of contents

|                                                                         |    |
|-------------------------------------------------------------------------|----|
| Notes.....                                                              | 3  |
| Synthesis of compounds .....                                            | 4  |
| Synthesis of the organic ligand.....                                    | 4  |
| Synthesis of the lanthanide complexes.....                              | 5  |
| Infrared spectroscopy .....                                             | 8  |
| Luminescence spectroscopy .....                                         | 9  |
| Cellular experiments.....                                               | 12 |
| Absorption spectroscopy .....                                           | 15 |
| MALDI data .....                                                        | 16 |
| Crystal structure data.....                                             | 17 |
| Nuclear magnetic resonance data .....                                   | 40 |
| Experimental details .....                                              | 40 |
| Spectra of H <sub>2</sub> L .....                                       | 42 |
| Spectra of Lu(HL) <sub>2</sub> Cl .....                                 | 44 |
| Spectra of K(H <sub>2</sub> O) <sub>3</sub> [Lu(L) <sub>2</sub> ] ..... | 52 |
| Spectra of Lu(L)(HL) .....                                              | 64 |
| Spectra of Yb(HL) <sub>2</sub> Cl.....                                  | 72 |

## Notes

◆ Associated with shielding of paired electrons. It can be estimated as a chemical shift in the spectrum of an analogue complex with a diamagnetic ion.

♥ Associated with the presence of unpaired electron density near the resonating nuclei due to the polarization of the filled electron shells of the ligand by the exchange interaction with the incompletely filled electron shell of the paramagnetic cation.

♠ Due to the dipole-dipole interaction of the magnetic moment of the resonating nucleus with the electron magnetic moment associated with the incompletely filled 4f electron shell of the lanthanide cation.

♣ The Fermi-contact shift  $\delta_{FC}$  can be determined by the formula  $\delta_{FC} = \langle S_F \rangle F$ , where the values of the  $\langle S_F \rangle = g_J(g_J - 1)J(J + 1)$  constant ( $J$  is the quantum number of the total angular momentum for the ground state,  $g_J$  is the Lange factor associated with this state) do not virtually depend on the ligand and can be determined solely by the lanthanide cation. The parameter  $F$  describes the relative contact interaction between the lanthanide cation and the resonating nucleus, i.e. this parameter is individual for each nucleus of the ligand under study.

## Synthesis of compounds

### Synthesis of the organic ligand

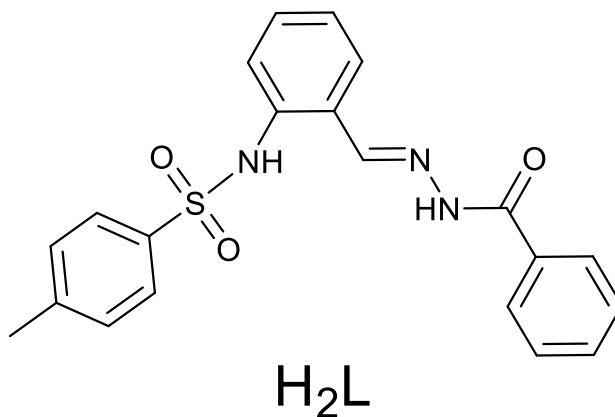

**Figure 1 Structure of the organic ligand H<sub>2</sub>L, 2-(tosylamino)-benzylidene-N-(benzoyl)hydrazone or N-[(E)-[2-(p-tolylsulfonylamino)phenyl]methyleneamino]benzamide**

Ligand H<sub>2</sub>L, 2-(tosylamino)-benzylidene-N-(benzoyl)hydrazone or N-[(E)-[2-(p-tolylsulfonylamino)phenyl]methyleneamino]benzamide (Figure 1) was synthesized according to the literature procedure previously reported by our team<sup>1</sup>.

---

<sup>1</sup> Dalton Trans., 2015, **44**, 12660 DOI: 10.1039/c5dt01161b

## Synthesis of the lanthanide complexes

Complexes **Ln(L)(HL)** (Ln = Lu, Yb) were synthesized according to the literature procedure previously reported by our team<sup>2</sup>.

Complexes **K(H<sub>2</sub>O)<sub>3</sub>[Ln(L)<sub>2</sub>]** (Ln = Lu, Yb) were synthesized according to the reaction

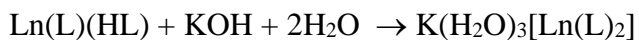

by the following procedure: 0.10 mmol of Ln(L)(HL) (96 mg, Ln = Lu, Yb) were dispersed in 50 ml of boiling ethanol under stirring. 0.090 mmol (5.0 mg) of KOH was added, the mixture was stirred for 15 min, hot-filtered and cooled down to room temperature. During the evaporation of the solution, a crystalline precipitate was obtained, which was filtered, washed with ethanol and dried.

Elemental analyses (C, H, N) were performed on a Vario Micro Cube analyzer (Elementar, Germany). Elemental analyses is in agreement with the composition K(H<sub>2</sub>O)<sub>3</sub>[Ln(L)<sub>2</sub>] (Ln = Lu, Yb) consisting three water molecules.

K(H<sub>2</sub>O)<sub>3</sub>[Lu(L)<sub>2</sub>] (C<sub>42</sub>H<sub>40</sub>O<sub>9</sub>N<sub>6</sub>S<sub>2</sub>LuK), calcd (found) (%):C, 48.00 (48.37); H, 3.84(4.05); N, 8.00 (7.78); calcd. for K(EtOH)<sub>3</sub>[Lu(L)<sub>2</sub>] (C<sub>48</sub>H<sub>52</sub>O<sub>9</sub>N<sub>6</sub>S<sub>2</sub>LuK) (%):C, 50.79; H, 4.62; N, 7.40.

K(H<sub>2</sub>O)<sub>3</sub>[Yb(L)<sub>2</sub>] (C<sub>42</sub>H<sub>40</sub>O<sub>9</sub>N<sub>6</sub>S<sub>2</sub>YbK), calcd. (found) (%):C, 18.08(47.61); H, 3.84(3.82); N, 8.01(7.71), calcd. for K(EtOH)<sub>3</sub>[Yb(L)<sub>2</sub>] (C<sub>48</sub>H<sub>52</sub>O<sub>9</sub>N<sub>6</sub>S<sub>2</sub>YbK) (%):C, 50.87; H, 4.63; N, 7.42.

---

<sup>2</sup> Dalton Trans., 2018, **47**, 4524–4533 DOI: 10.1039/c7dt04387b

## Thermal analysis

Thermal analyses were carried out on a thermoanalyzer STA 409 PC Luxx (NETZSCH, Germany) in the temperature range of 20-1000 °C in air, heating rate 10 °C/min.

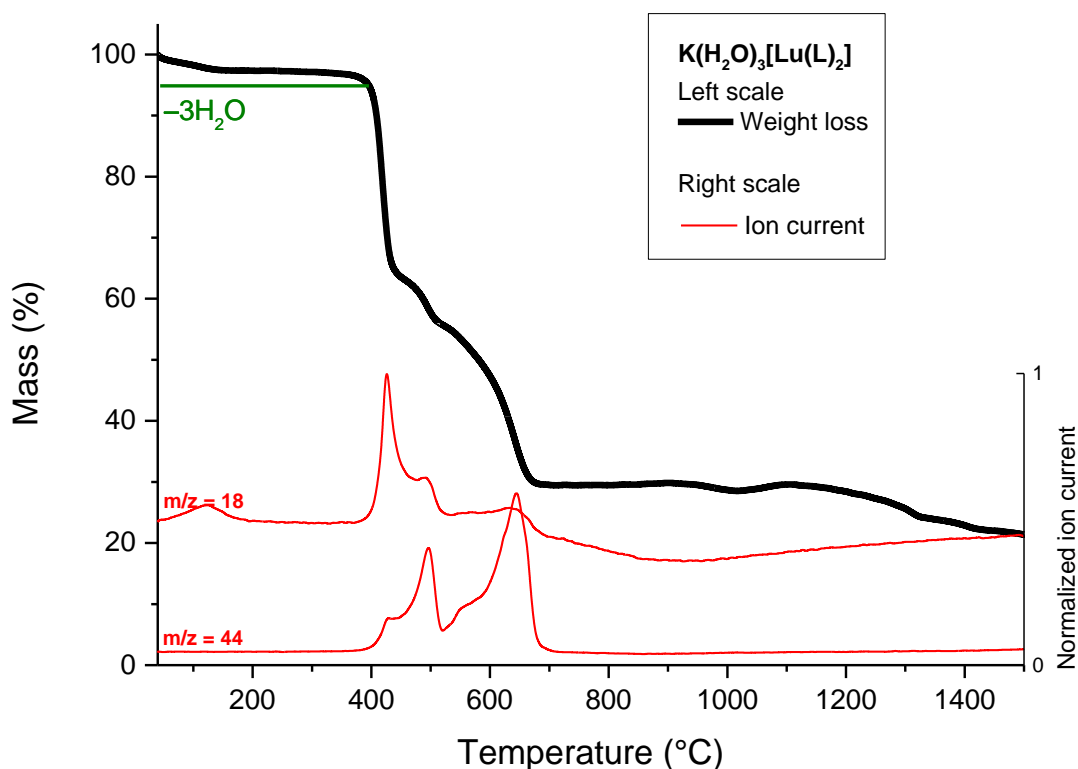

**Figure 2 Thermal analysis of  $\text{K}(\text{H}_2\text{O})_3[\text{Lu}(\text{L})_2]$ . The black curve corresponds to the weight loss (left scale), red curves correspond to the normalized ion current of the detector of the coupled to the thermoanalyzer mass spectrometer.**

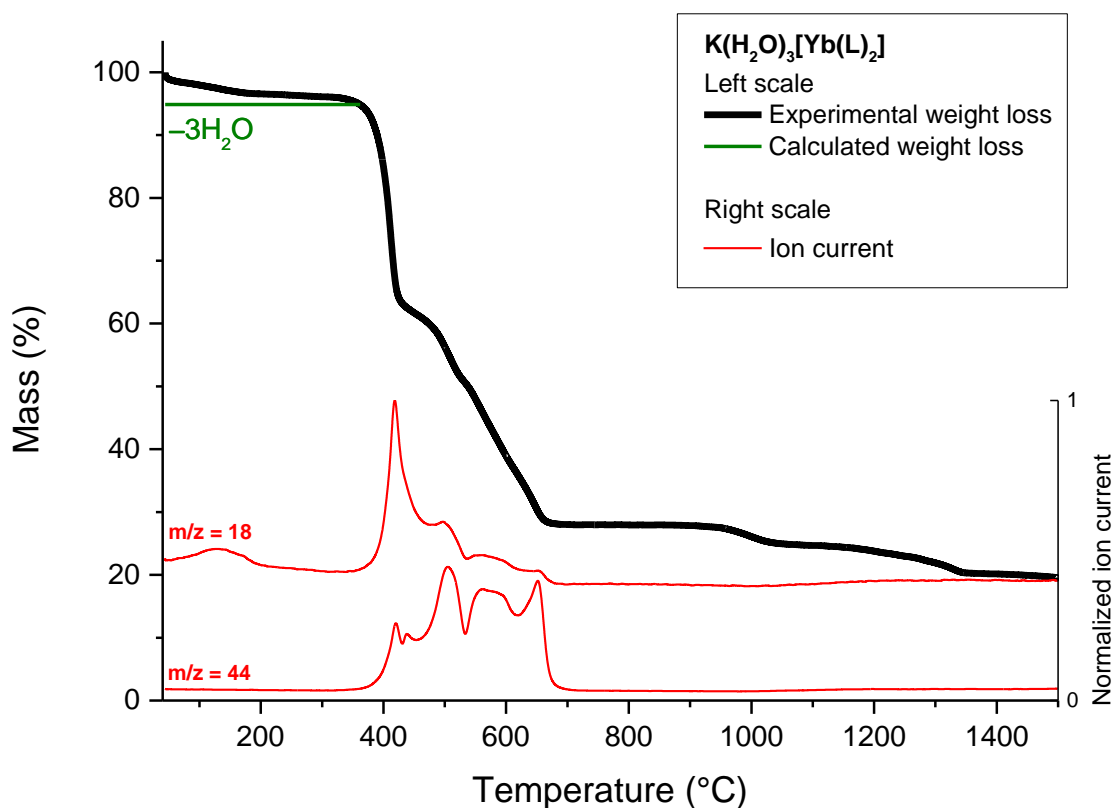

**Figure 3 Thermal analysis of  $\text{K}(\text{H}_2\text{O})_3[\text{Yb}(\text{L})_2]$ . The black curve corresponds to the weight loss (left scale), blue and red curves correspond to the normalized ion current of the detector of the coupled to the thermoanalyzer mass spectrometer.**

The experimental weight loss (78.6% for  $\text{K}(\text{H}_2\text{O})_3[\text{Lu}(\text{L})_2]$  and 80.5% for  $\text{K}(\text{H}_2\text{O})_3[\text{Yb}(\text{L})_2]$ ) in thermal analyses is in agreement with its decomposition into the lanthanide oxides (81.1% and 81.2% for  $\text{K}(\text{H}_2\text{O})_3[\text{Ln}(\text{L})_2]$ ,  $\text{Ln} = \text{Lu}, \text{Yb}$ , correspondingly) and additionally allows to prove the number of solvent molecules in complexes. The first stage of the weight loss of about 5% up to  $\sim 380^\circ\text{C}$  correspond to the loss of three water molecules (calcd. 5.1% for both  $\text{K}(\text{H}_2\text{O})_3[\text{Ln}(\text{L})_2]$ ,  $\text{Ln} = \text{Lu}, \text{Yb}$ ; loss of ethanol molecules would correspond to 12.2% weight loss for both  $\text{K}(\text{EtOH})_3[\text{Ln}(\text{L})_2]$  for both  $\text{Ln} = \text{Lu}, \text{Yb}$ ). Additionally, loss of water solvent molecules is confirmed by a presence of the peak in this range with  $m/z = 18$  on the ion current curves of the coupled mass spectrometer detector. Further heating decomposes complexes into the lanthanide oxides.

## Infrared spectroscopy

IR spectra in the ATR mode were recorded on a spectrometer Spectrum One (Perkin-Elmer) in the region of 400-4000  $\text{cm}^{-1}$ .

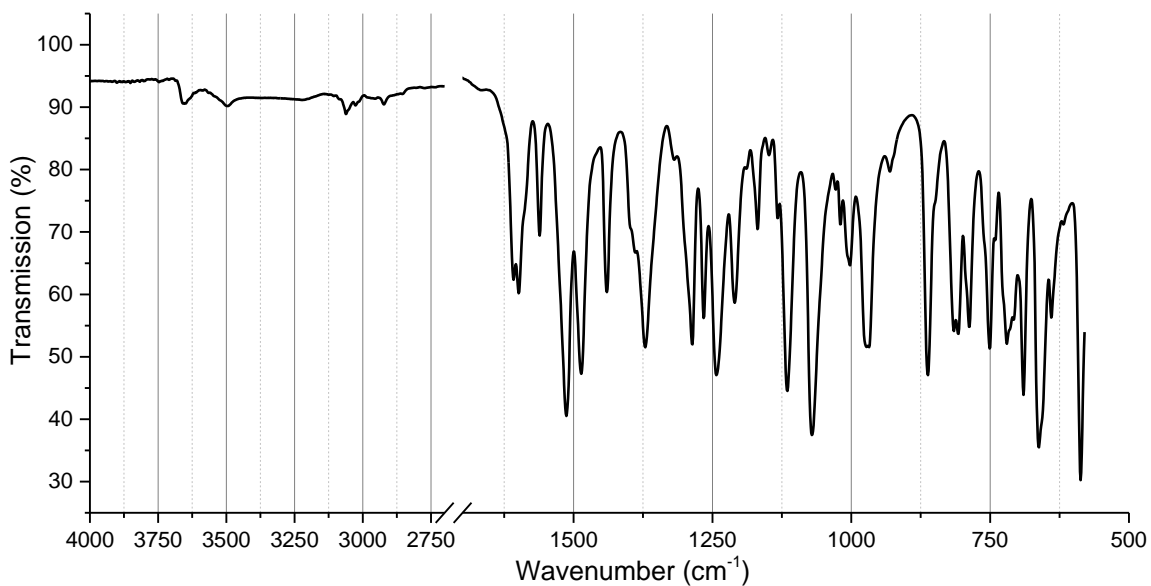

**Figure 4** IR spectrum of  $\text{K}(\text{H}_2\text{O})_3[\text{Lu}(\text{L})_2]$

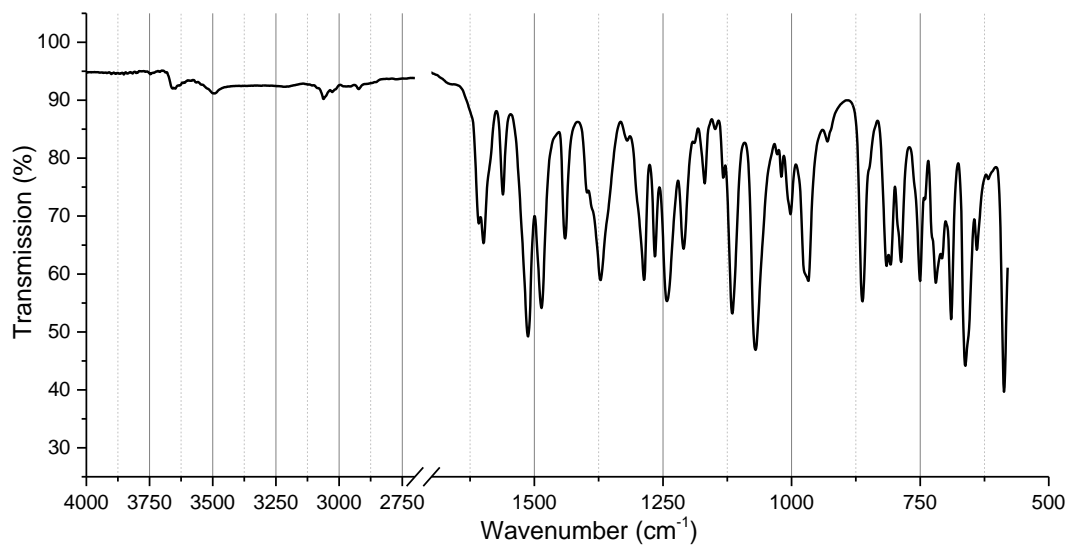

**Figure 5** IR spectrum of  $\text{K}(\text{H}_2\text{O})_3[\text{Yb}(\text{L})_2]$



## Luminescence spectroscopy

Photoluminescence and excitation spectra of  $\text{K}(\text{H}_2\text{O})_3[\text{Yb}(\text{L})_2]$  were measured using Fluorolog FL3-22 spectrofluorometer at room temperature. Quantum yield of  $\text{K}(\text{H}_2\text{O})_3[\text{Yb}(\text{L})_2]$  was determined using Fluorolog FL3-22 spectrofluorometer at room temperature under excitation into ligand states, according to an absolute method, using an integrating sphere.

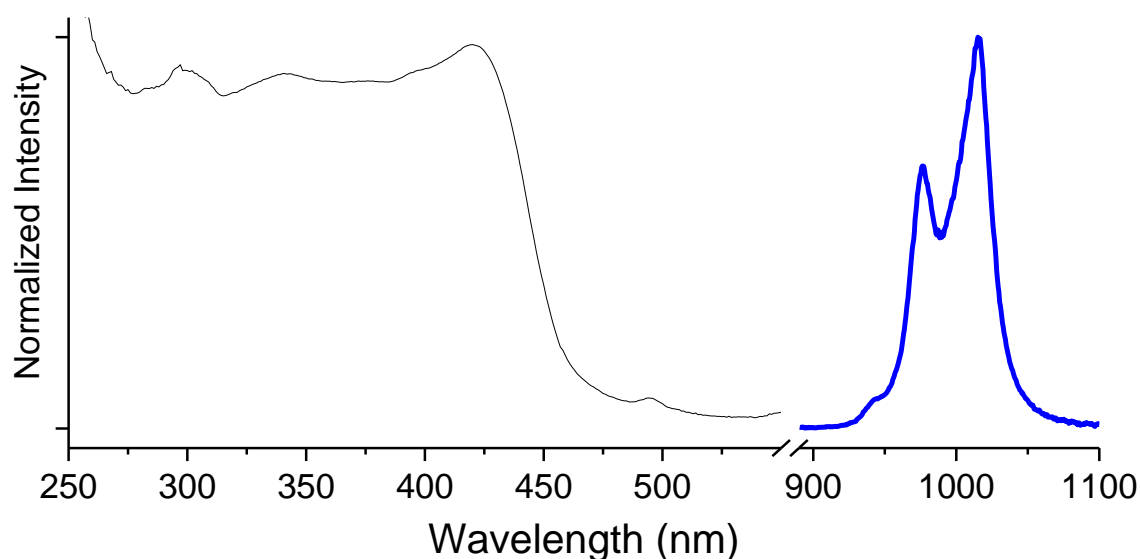

**Figure 6 Luminescence and excitation spectra of  $\text{K}(\text{H}_2\text{O})_3[\text{Yb}(\text{L})_2]$  in powder at 298 K**

**The lifetime in NIR range** of  $\text{K}(\text{H}_2\text{O})_3[\text{Yb}(\text{L})_2]$  emission (luminescence at 980 nm upon 365 nm excitation) was measured using an Edinburgh Instruments FLS980 Fluorescence Spectrometer equipped with 450 W Xenon lamp. The R5509-72 photomultiplier tube from Hamamatsu in nitrogen-flow cooled housing was used as a detector for near infrared range. The dependence of the luminescence intensity of  $\text{K}(\text{H}_2\text{O})_3[\text{Yb}(\text{L})_2]$  (at 980 nm upon 365 nm excitation) on time was fitted with a single exponential decay function, providing the observed lifetime of ytterbium emission  $\tau_{\text{obs}} = 12 \pm \mu\text{s}$ .

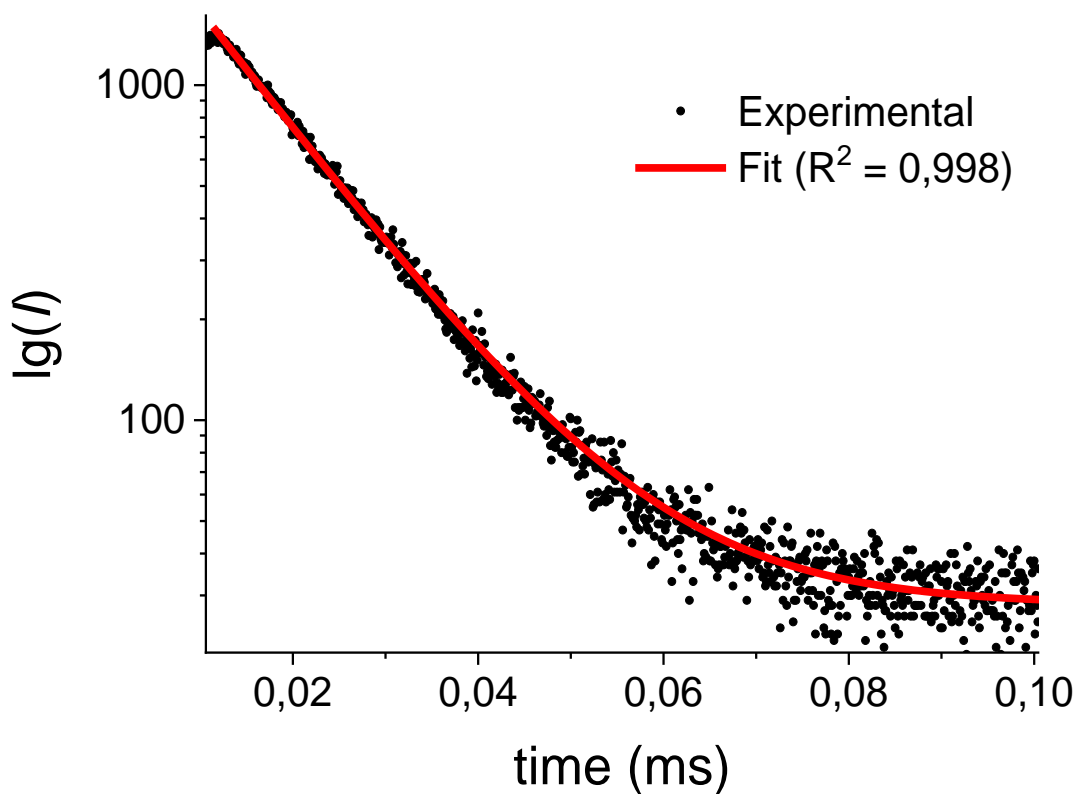

**Figure 7** Dependence of the logarithm of the luminescence intensity of  $\text{K}(\text{H}_2\text{O})[\text{Yb}(\text{L})_2]$  (at 980 nm upon 365 nm excitation) on time. The single exponential decay fit provides the observed lifetime of ytterbium emission  $\tau_{\text{obs}} = 12 \pm 1 \mu\text{s}$ .

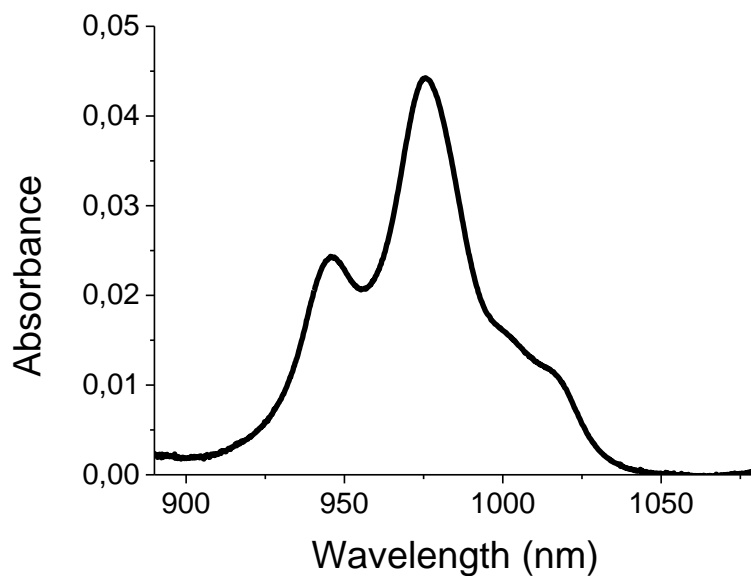

**Figure 8** Absorption spectrum of  $\text{K}(\text{H}_2\text{O})[\text{Yb}(\text{L})_2]$  in DMSO at 16.9 mM ( $l = 1 \text{ cm}$ ).

The radiative lifetime of ytterbium ion can be calculated from the absorption spectrum corresponding to the emission spectrum with the help of the modified Einstein's equation<sup>3</sup>:

$$\frac{1}{\tau_{rad}} = 2303 \times \frac{8\pi c n^2 \tilde{\nu}_m^2 (2J+1)}{N_A (2J'+1)} \int \varepsilon(\tilde{\nu}) d\tilde{\nu}$$

where  $c$  is the speed of light in vacuum ( $\text{cm sec}^{-1}$ ),  $n$  is refractive index,  $N_A$  is Avogadro's number,  $J$  and  $J'$  are the quantum numbers for the ground and excited states, respectively,  $\int \varepsilon(\tilde{\nu}) d\tilde{\nu}$  is the integrated

spectrum of the f-f transition,  $\tilde{\nu}_m = \frac{\int \tilde{\nu} \varepsilon(\tilde{\nu}) d\tilde{\nu}}{\int \varepsilon(\tilde{\nu}) d\tilde{\nu}}$  is the barycenter of the transition. Using the modified Einstein's equation and the absorption spectrum of  $\text{K}(\text{H}_2\text{O})[\text{Yb}(\text{L})_2]$  in DMSO, the radiative lifetime of the ytterbium emission in  $\text{K}(\text{H}_2\text{O})[\text{Yb}(\text{L})_2]$  was calculated to be  $\tau_{rad} = 0.83$  ms (where the integrated spectrum of the f-f transition was found to be  $1327 \text{ M}^{-1}$  and the barycenter of the transition is  $10235 \text{ cm}^{-1}$ ).

Knowing the observed and radiative lifetimes of ytterbium emission in  $\text{K}(\text{H}_2\text{O})[\text{Yb}(\text{L})_2]$  DMSO solution though the ligand excitation, the intrinsic quantum yield can be calculated by the formula  $Q_{Yb}^{Yb} = \frac{\tau_{obs}}{\tau_{rad}} =$

1.4%.

The sensitization efficiency of the ytterbium emission by the ligand can be calculated by the formula

$\eta_{sens} = \frac{Q_{Yb}^L}{Q_{Yb}^{Yb}} \sim 90\%$ , where  $Q_{Yb}^L = 1.3 \pm 0.2\%$  – overall quantum yield of  $\text{K}(\text{H}_2\text{O})[\text{Yb}(\text{L})_2]$  luminescence.

---

<sup>3</sup> Martinus H.V. Werts, Ronald T.F. Jukes, Jan W. Verhoeven, *PCCP*, 2002, **4**, 1542

## Cellular experiments

The cellular experiments were performed using HeLa cells. Firstly, the cytotoxicity of  $\text{K}(\text{H}_2\text{O})_3[\text{Yb}(\text{L})_2]$  solutions was determined. Because  $\text{K}(\text{H}_2\text{O})_3[\text{Yb}(\text{L})_2]$  is poorly soluble in water, the solutions were prepared by dilution of a stock 20 g/L DMSO solution of  $\text{K}(\text{H}_2\text{O})_3[\text{Yb}(\text{L})_2]$  into a cell culture media. After that, the confocal microscopy experiments were performed using  $\text{K}(\text{H}_2\text{O})_3[\text{Yb}(\text{L})_2]$  solution at a safe concentration (5 mg/L, 0.025% DMSO). In the absence of the detector in the micron-range attached to the confocal microscope, to show the proof of principle that  $\text{K}(\text{H}_2\text{O})_3[\text{Yb}(\text{L})_2]$  can be used for luminescence bioimaging, the luminescence was detected in the range 600 – 750 nm which corresponded to the luminescence of the organic ligand.

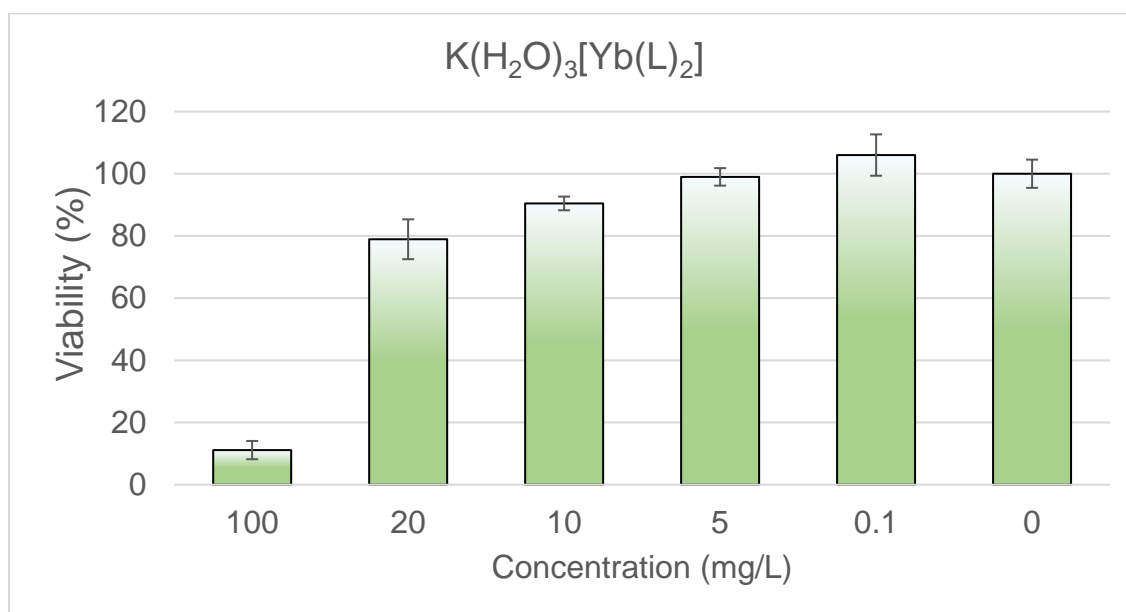

**Figure 9 HeLa cell variability at different concentrations of  $\text{K}(\text{H}_2\text{O})_3[\text{Yb}(\text{L})_2]$ . Error bars correspond to 2s value.**

**Cytotoxicity** was assessed using an MTT assay. To determine the toxic effect of the probes towards HeLa cells, the CellTiter 96<sup>®</sup> Non-Radioactive Cell Proliferation Assay (Promega) was used. This assay is based on the intracellular reduction of a tetrazolium salt (yellow) into a formazan product (blue), which

only takes place in metabolic active cells. The generated formazan is detectable at wavelengths between 630–750 nm and is a direct measure for the viability of the cells. For this assay, each well of a 96 well plate (Cstar 3596, 96 Well Cell Culture Cluster, sterile) was seeded with  $1 \times 10^4$  HeLa cells in 100  $\mu$ l Dulbecco's modified Eagle's medium (DMEM, high glucose, Gibco) supplemented with 10% fetal calf serum (FCS, PAA), and 1 U/mL Penicillin/Streptomycin at 37 °C, 5% CO<sub>2</sub> and 95% humidity. After 24 h cells were incubated the samples at different concentrations. For each concentration, 6 wells were prepared and incubated for 72 h. A set of positive (cells treated with 5  $\mu$ l of 20% triton) and negative (untreated cells) control wells, as well as the test samples, were treated with 15  $\mu$ l of the Dye Solution and incubated for 4 h. 100  $\mu$ l Solubilization Solution/Stop Mix is then added to each well to solubilize the formazan product, according to the manufacturer's manual. After 24 h incubation, the absorbance at 595 nm using a 96-well plate reader (Ultra Microplate Reader ELx808, BioTEK Instruments, INC) was measured. Data were averaged and the multiple determination of each substance and concentration made it possible to calculate the standard deviation

LD<sub>50</sub> = 50 ±13 mg/L was calculated by a linear approximation in the least range containing 50% viability point and limited by two experimental points. Safe concentration (cell survival > 80%) is 20 mg/L.

**Confocal microscopy.** Two hours after seeding,  $1 \times 10^4$  HeLa cells per a well plate were transferred into 8-well ibiTreat chamber slides (Ibidi, Martinsried, Germany) in 0.2 mL of the medium. After 24 h, cells were treated with the tested compounds at the desired concentrations. After the next 24 h, the cells were washed and then investigated using confocal microscope Leica TCS-SPE (DM2500), equipped with ACS APO 63x/1.30 OIL object-glass. Fluorescence excitation was performed by the 488-nm line or 405-nm line of an Ar-ion laser 15%, resolution 8 bit, line average 16, format 1024 × 1024 pixels, 200 Hz. Fluorescence detection took place in the red channel (600–750 nm). Additionally, brightfield images were

recorded in a third independent channel. The images were recorded and then analyzed using LAS-AF 2.0.2.4647 software.

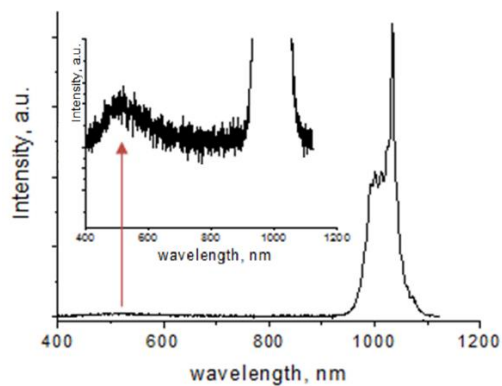

**Figure 10 Photoluminescence spectrum of  $\text{K}(\text{H}_2\text{O})_3[\text{Yb}(\text{L})_2]$ . Insert shows the ligand luminescence band which was used for confocal microscopy.**

## Absorption spectroscopy

Absorption spectra were obtained using Perkin Elmer LAMBDA 950 spectrometer.

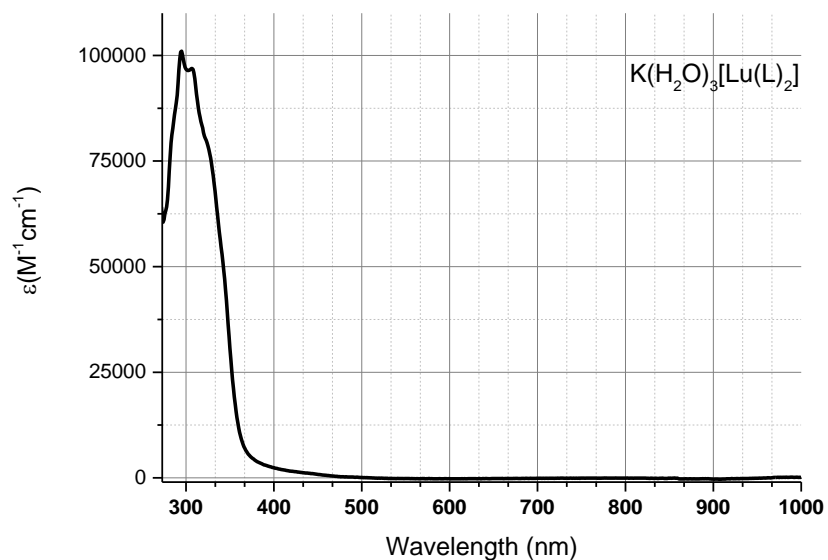

**Figure 11 Absorption spectrum of  $K(H_2O)_3[Lu(L)_2]$  in DMSO**

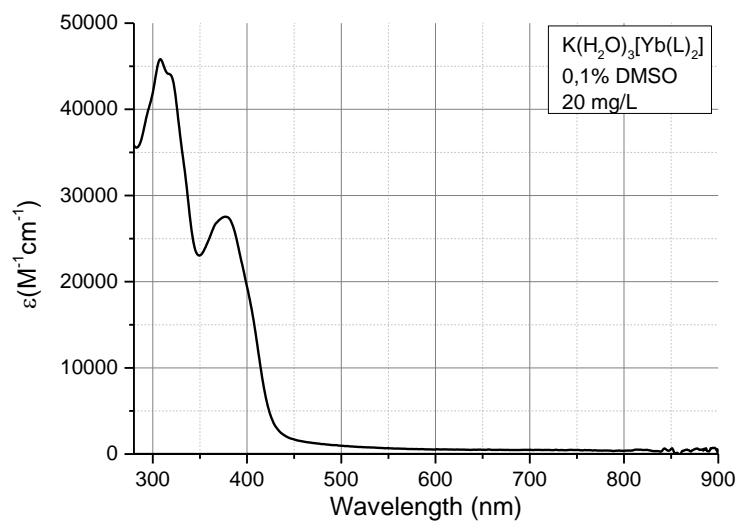

**Figure 12 Absorption spectrum of  $K(H_2O)_3[Yb(L)_2]$  in water – 0.1%DMSO at 20 mg/L.**

## MALDI data

MALDI spectroscopy was made on Autoflex II with time of flight detector (Bruker Daltonics, Germany).

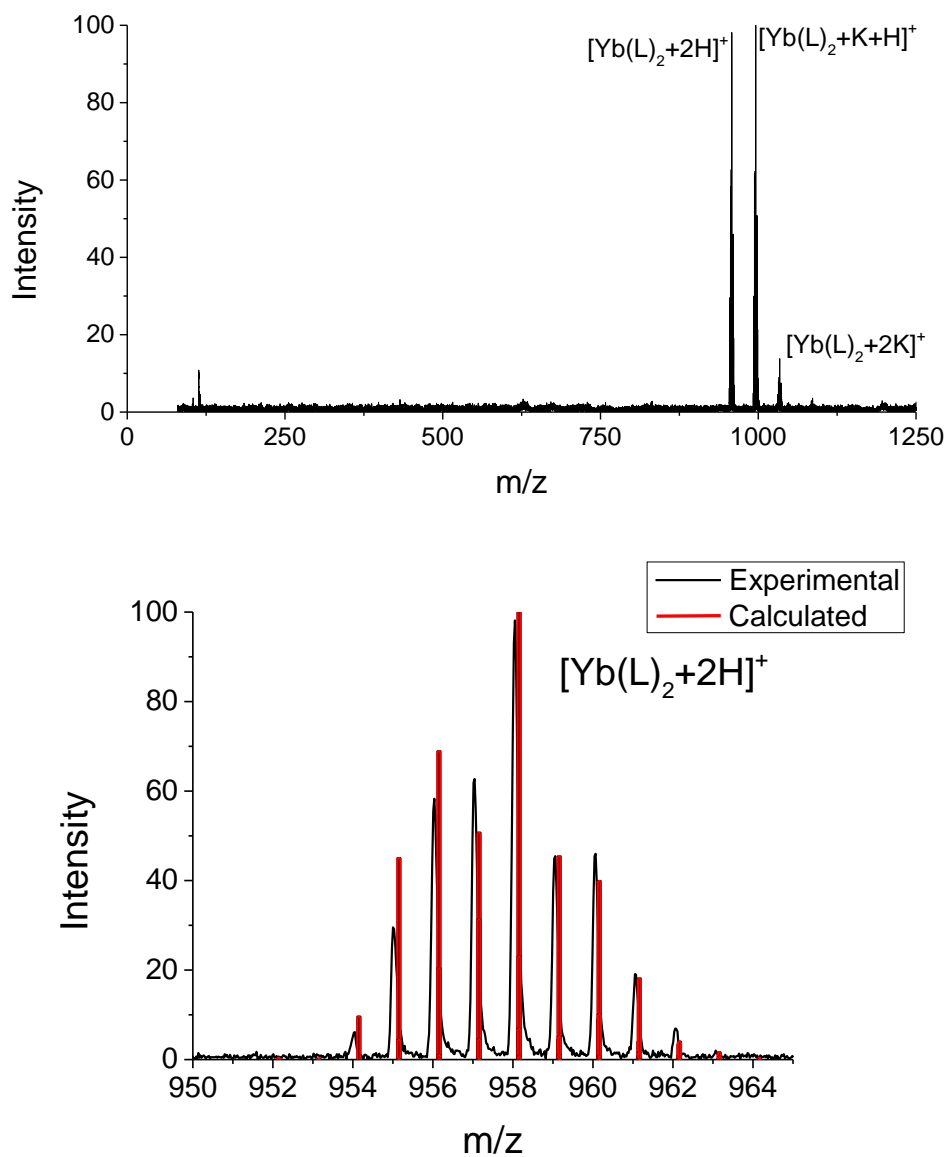

Figure 13 MALDI mass-spectrum of  $\text{K}(\text{H}_2\text{O})_3[\text{Yb}(\text{L})_2]$ .



## Crystal structure data

Single crystals of  $\text{K}(\text{EtOH})_3[\text{Yb}(\text{L})_2]$  ( $\text{C}_{48}\text{H}_{52}\text{KN}_6\text{O}_9\text{S}_2\text{Yb}$ ) were grown from ethanol. A suitable crystal was selected and mounted on a glass fiber on Bruker APEX-II CCD diffractometer. The crystal was kept at 120 K during data collection. Using Olex2 [1], the structure was solved with the XS [2] structure solution program using Direct Methods and refined with the XL [2] refinement package using Least Squares minimisation.

1. Dolomanov, O.V., Bourhis, L.J., Gildea, R.J., Howard, J.A.K. & Puschmann, H. (2009), *J. Appl. Cryst.* 42, 339-341.
2. Sheldrick, G.M. (2008). *Acta Cryst.* A64, 112-122.

**Crystal Data** for  $\text{C}_{48}\text{H}_{52}\text{KN}_6\text{O}_9\text{S}_2\text{Yb}$  ( $M = 1133.22$  g/mol): triclinic, space group P-1 (no. 2),  $a = 9.2427(13)$  Å,  $b = 11.0807(15)$  Å,  $c = 24.563(3)$  Å,  $\alpha = 86.803(2)^\circ$ ,  $\beta = 88.788(2)^\circ$ ,  $\gamma = 74.750(2)^\circ$ ,  $V = 2423.2(6)$  Å<sup>3</sup>,  $Z = 2$ ,  $T = 120$  K,  $\mu(\text{MoK}\alpha) = 2.163$  mm<sup>-1</sup>,  $D_{\text{calc}} = 1.553$  g/cm<sup>3</sup>, 25777 reflections measured ( $1.66^\circ \leq 2\theta \leq 56.56^\circ$ ), 11989 unique ( $R_{\text{int}} = 0.0633$ ,  $R_{\text{sigma}} = 0.0961$ ) which were used in all calculations. The final  $R_1$  was 0.0429 ( $>2\sigma(I)$ ) and  $wR_2$  was 0.0832 (all data).

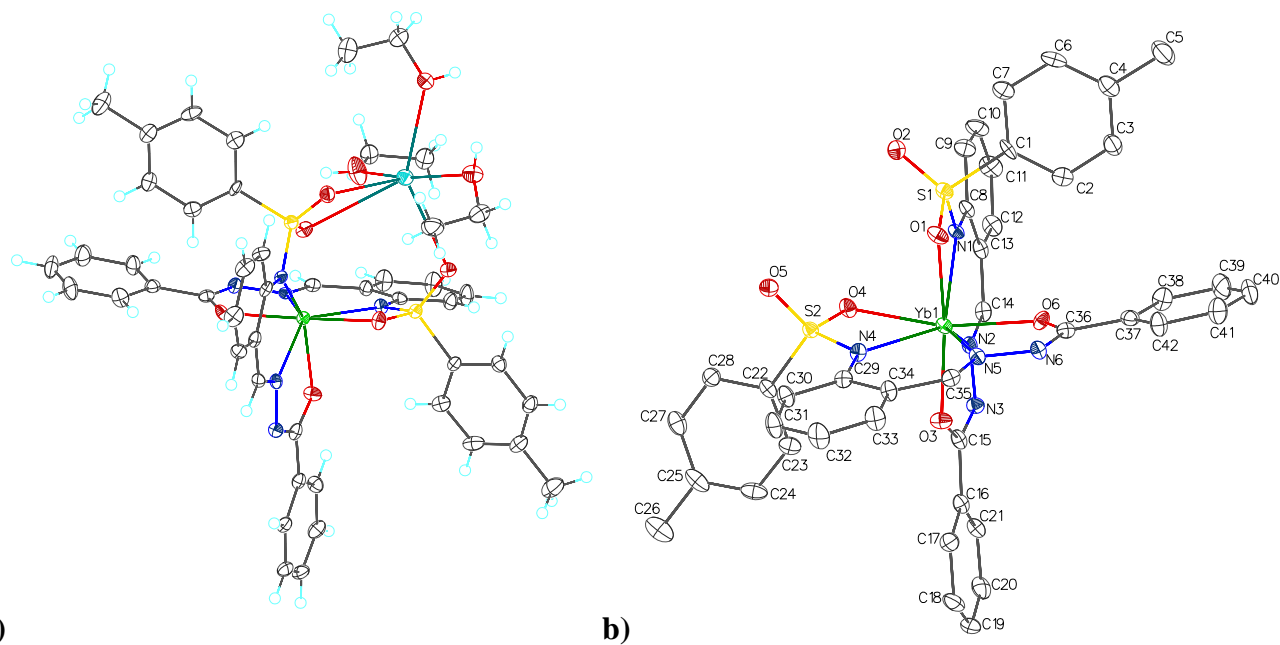

**Figure 14** The general view of K(EtOH)<sub>3</sub>[Yb(L)<sub>2</sub>] (CCDC 2016985). Atoms are represented a) by thermal displacement ellipsoids, b) by thermal displacement ellipsoids, hydrogen atoms are not shown.

**Table 1 Crystal data and structure refinement for K(EtOH)<sub>3</sub>[Yb(L)<sub>2</sub>] (CCDC 2016985)**

|                                             |                                                                                  |
|---------------------------------------------|----------------------------------------------------------------------------------|
| Empirical formula                           | C <sub>48</sub> H <sub>52</sub> KN <sub>6</sub> O <sub>9</sub> S <sub>2</sub> Yb |
| Formula weight                              | 1133.22                                                                          |
| Temperature/K                               | 120                                                                              |
| Crystal system                              | triclinic                                                                        |
| Space group                                 | P-1                                                                              |
| a/Å                                         | 9.2427 (13)                                                                      |
| b/Å                                         | 11.0807 (15)                                                                     |
| c/Å                                         | 24.563 (3)                                                                       |
| α/°                                         | 86.803 (2)                                                                       |
| β/°                                         | 88.788 (2)                                                                       |
| γ/°                                         | 74.750 (2)                                                                       |
| Volume/Å <sup>3</sup>                       | 2423.2 (6)                                                                       |
| Z                                           | 2                                                                                |
| ρ <sub>calc</sub> /cm <sup>3</sup>          | 1.553                                                                            |
| μ/mm <sup>-1</sup>                          | 2.163                                                                            |
| F(000)                                      | 1150.0                                                                           |
| Crystal size/mm <sup>3</sup>                | 0.21 × 0.15 × 0.07                                                               |
| Radiation                                   | MoKα (λ = 0.71073)                                                               |
| 2θ range for data collection/°              | 1.66 to 56.56                                                                    |
| Index ranges                                | -12 ≤ h ≤ 12, -14 ≤ k ≤ 14, -32<br>≤ l ≤ 32                                      |
| Reflections collected                       | 25777                                                                            |
| Independent reflections                     | 11989 [R <sub>int</sub> = 0.0633, R <sub>sigma</sub> =<br>0.0961]                |
| Data/restraints/parameters                  | 11989/9/618                                                                      |
| Goodness-of-fit on F <sup>2</sup>           | 0.996                                                                            |
| Final R indexes [I ≥ 2σ (I)]                | R <sub>1</sub> = 0.0429, wR <sub>2</sub> = 0.0740                                |
| Final R indexes [all data]                  | R <sub>1</sub> = 0.0647, wR <sub>2</sub> = 0.0832                                |
| Largest diff. peak/hole / e Å <sup>-3</sup> | 2.00/-1.80                                                                       |

**Table 2 Fractional Atomic Coordinates ( $\times 10^4$ ) and Equivalent Isotropic Displacement Parameters ( $\text{\AA}^2 \times 10^3$ ) for  $\text{K}(\text{EtOH})_3[\text{Yb}(\text{L})_2]$  (CCDC 2016985).  $U_{\text{eq}}$  is defined as 1/3 of the trace of the orthogonalised  $U_{\text{IJ}}$  tensor.**

| Atom | <i>x</i>    | <i>y</i>    | <i>z</i>    | $U(\text{eq})$ |
|------|-------------|-------------|-------------|----------------|
| Yb1  | 9822.7 (2)  | 504.29 (19) | 2389.80 (8) | 11.83 (5)      |
| S1   | 8930.8 (11) | 2403.4 (10) | 3279.5 (4)  | 14.7 (2)       |
| S2   | 9295.2 (11) | 2585.2 (10) | 1495.1 (4)  | 13.3 (2)       |
| O1   | 7984 (3)    | 1955 (3)    | 2903.8 (12) | 17.3 (7)       |
| O6   | 9753 (3)    | -957 (3)    | 3042.4 (12) | 15.6 (6)       |
| O3   | 10875 (3)   | -817 (3)    | 1760.6 (12) | 17.0 (7)       |
| O2   | 8695 (3)    | 3739 (3)    | 3245.6 (12) | 20.3 (7)       |
| O4   | 10449 (3)   | 2231 (3)    | 1921.3 (12) | 17.0 (7)       |
| O5   | 8416 (3)    | 3876 (3)    | 1487.0 (12) | 20.6 (7)       |
| N6   | 7472 (4)    | -1191 (3)   | 2744.4 (14) | 15.3 (8)       |
| N1   | 10532 (4)   | 1567 (3)    | 3132.5 (13) | 12.3 (7)       |
| N4   | 8405 (4)    | 1573 (3)    | 1614.5 (14) | 13.5 (7)       |
| N2   | 12503 (4)   | -320 (3)    | 2513.1 (14) | 13.7 (7)       |
| N3   | 13201 (4)   | -1281 (3)   | 2162.1 (14) | 14.8 (8)       |
| N5   | 7651 (4)    | -319 (3)    | 2318.2 (14) | 14.3 (8)       |
| C19  | 13910 (5)   | -4282 (4)   | 655.6 (19)  | 24.2 (11)      |
| C40  | 8336 (6)    | -3776 (5)   | 4511 (2)    | 30.3 (12)      |
| C20  | 14900 (5)   | -3981 (4)   | 1015.2 (18) | 22.4 (10)      |
| C26  | 12325 (6)   | 2053 (5)    | -722 (2)    | 35.0 (13)      |
| C5   | 7050 (6)    | 956 (5)     | 5546 (2)    | 35.7 (13)      |
| C32  | 4769 (5)    | 1252 (5)    | 670 (2)     | 28.0 (12)      |
| C38  | 9659 (5)    | -2571 (4)   | 3954.2 (19) | 22.6 (10)      |
| C11  | 14498 (5)   | 1687 (5)    | 3930.9 (19) | 23.8 (11)      |
| C18  | 12414 (5)   | -3607 (4)   | 655.7 (18)  | 23.8 (11)      |
| C39  | 9578 (6)    | -3331 (5)   | 4412 (2)    | 30.5 (12)      |
| C42  | 7250 (5)    | -2723 (4)   | 3678.2 (19) | 22.7 (10)      |
| C41  | 7170 (6)    | -3468 (5)   | 4141 (2)    | 28.7 (12)      |
| C34  | 6328 (5)    | 676 (4)     | 1476.0 (18) | 16.1 (9)       |
| C8   | 11831 (5)   | 1637 (4)    | 3399.4 (16) | 13.5 (9)       |
| C13  | 13214 (5)   | 795 (4)     | 3262.6 (17) | 14.9 (9)       |
| C22  | 10220 (4)   | 2395 (4)    | 854.9 (17)  | 13.6 (9)       |
| C1   | 8448 (4)    | 1996 (4)    | 3952.0 (16) | 15.5 (9)       |
| C2   | 8728 (5)    | 741 (4)     | 4120.8 (18) | 20.1 (10)      |
| C15  | 12263 (5)   | -1436 (4)   | 1794.4 (17) | 15.4 (9)       |
| C35  | 6582 (5)    | -140 (4)    | 1967.9 (17) | 15.0 (9)       |
| C29  | 7179 (4)    | 1507 (4)    | 1296.5 (17) | 14.1 (9)       |
| C36  | 8605 (5)    | -1417 (4)   | 3090.9 (17) | 14.5 (9)       |

| <b>Atom</b> | <b>x</b>    | <b>y</b>   | <b>z</b>    | <b>U(eq)</b> |
|-------------|-------------|------------|-------------|--------------|
| C37         | 8495 (5)    | -2253 (4)  | 3579.5 (17) | 16.4 (9)     |
| C12         | 14523 (5)   | 853 (4)    | 3538.5 (18) | 19.2 (10)    |
| C14         | 13451 (4)   | -128 (4)   | 2859.5 (17) | 14.8 (9)     |
| C24         | 11233 (5)   | 1145 (5)   | 103.3 (19)  | 22.9 (11)    |
| C16         | 12878 (5)   | -2393 (4)  | 1390.4 (17) | 15.9 (9)     |
| C21         | 14395 (5)   | -3050 (4)  | 1373.3 (17) | 17.4 (9)     |
| C25         | 11569 (5)   | 2174 (5)   | -173.7 (18) | 22.6 (11)    |
| C30         | 6786 (5)    | 2200 (4)   | 798.8 (18)  | 18.9 (10)    |
| C31         | 5614 (5)    | 2054 (5)   | 489.1 (19)  | 24.7 (11)    |
| C7          | 7746 (5)    | 2925 (4)   | 4300.1 (18) | 20.2 (10)    |
| C23         | 10574 (5)   | 1244 (4)   | 618.1 (18)  | 19.5 (10)    |
| C4          | 7560 (5)    | 1327 (5)   | 4991.3 (18) | 21.7 (10)    |
| C28         | 10548 (5)   | 3429 (4)   | 585.2 (18)  | 18.3 (10)    |
| C33         | 5116 (5)    | 581 (5)    | 1159.9 (19) | 22.7 (11)    |
| C27         | 11232 (5)   | 3299 (5)   | 78.0 (18)   | 22.0 (10)    |
| C17         | 11904 (5)   | -2680 (4)  | 1022.1 (18) | 18.9 (10)    |
| C9          | 11831 (5)   | 2504 (4)   | 3800.2 (18) | 19.1 (10)    |
| C10         | 13144 (5)   | 2515 (4)   | 4061.7 (18) | 22.5 (10)    |
| C6          | 7313 (5)    | 2577 (5)   | 4816.2 (18) | 23.7 (11)    |
| C3          | 8291 (5)    | 414 (5)    | 4641.3 (18) | 23.0 (11)    |
| O1S         | 7717 (4)    | 6587 (3)   | 2142.2 (13) | 24.7 (7)     |
| C1S         | 9260 (5)    | 6460 (5)   | 2010 (2)    | 28.1 (12)    |
| C2S         | 10303 (6)   | 5743 (5)   | 2451 (2)    | 36.3 (13)    |
| O3S         | 4588 (4)    | 6540 (3)   | 2791.7 (13) | 27.2 (8)     |
| C6S         | 3670 (7)    | 5385 (5)   | 3507 (2)    | 44.5 (15)    |
| C5S         | 3526 (6)    | 6637 (5)   | 3219 (2)    | 31.1 (12)    |
| O2S         | 4964 (4)    | 2970 (3)   | 2460.4 (16) | 37.3 (9)     |
| C3S         | 3560 (5)    | 2910 (5)   | 2242 (2)    | 25.3 (11)    |
| C4S         | 3317 (5)    | 3731 (5)   | 1726 (2)    | 29.6 (12)    |
| K5          | 6628.8 (11) | 4604.6 (9) | 2388.6 (4)  | 20.7 (2)     |

**Table 3 Anisotropic Displacement Parameters ( $\text{\AA}^2 \times 10^3$ ) for  $\text{K}(\text{EtOH})_3[\text{Yb}(\text{L})_2]$  (CCDC 2016985). The Anisotropic displacement factor exponent takes the form:  $-2\pi^2[h^2a^{*2}U_{11}+2hka^*b^*U_{12}+\dots]$ .**

| Atom | $U_{11}$  | $U_{22}$   | $U_{33}$  | $U_{23}$  | $U_{13}$  | $U_{12}$  |
|------|-----------|------------|-----------|-----------|-----------|-----------|
| Yb1  | 8.71 (9)  | 16.23 (10) | 10.86 (9) | -0.82 (6) | -2.44 (6) | -3.61 (7) |
| S1   | 12.4 (5)  | 18.2 (6)   | 12.7 (5)  | -1.2 (4)  | -2.5 (4)  | -2.4 (4)  |
| S2   | 13.6 (5)  | 15.2 (5)   | 12.2 (5)  | -0.9 (4)  | -1.2 (4)  | -5.2 (4)  |
| O1   | 12.1 (15) | 27.9 (18)  | 13.0 (16) | -3.6 (13) | -4.1 (12) | -6.4 (13) |
| O6   | 14.0 (15) | 11.5 (15)  | 20.7 (17) | 1.4 (12)  | -6.4 (12) | -2.5 (12) |
| O3   | 10.6 (15) | 20.9 (17)  | 19.0 (17) | -6.2 (13) | -5.3 (12) | -2.0 (13) |
| O2   | 23.9 (17) | 18.3 (17)  | 17.7 (17) | 0.7 (13)  | -2.1 (13) | -4.0 (14) |
| O4   | 17.9 (16) | 22.0 (17)  | 13.6 (16) | 1.5 (13)  | -5.6 (12) | -9.8 (13) |
| O5   | 23.3 (17) | 18.0 (17)  | 18.4 (17) | -2.0 (13) | 3.9 (13)  | -2.2 (13) |
| N6   | 15.6 (18) | 18 (2)     | 13.1 (19) | 1.5 (15)  | -0.9 (14) | -5.9 (15) |
| N1   | 11.1 (17) | 16.0 (19)  | 9.5 (18)  | -1.3 (14) | -1.1 (13) | -2.9 (14) |
| N4   | 10.4 (17) | 15.2 (19)  | 16.2 (19) | 1.1 (15)  | -3.1 (14) | -5.8 (14) |
| N2   | 14.0 (18) | 14.1 (19)  | 13.2 (19) | 0.9 (14)  | -2.8 (14) | -4.5 (15) |
| N3   | 14.4 (18) | 16.2 (19)  | 14.4 (19) | -2.2 (15) | -2.7 (14) | -4.6 (15) |
| N5   | 10.3 (17) | 16.9 (19)  | 13.0 (19) | 0.5 (15)  | 0.7 (14)  | 0.8 (15)  |
| C19  | 33 (3)    | 21 (3)     | 17 (2)    | -5.5 (19) | 9 (2)     | -5 (2)    |
| C40  | 42 (3)    | 30 (3)     | 19 (3)    | 9 (2)     | -1 (2)    | -12 (2)   |
| C20  | 17 (2)    | 28 (3)     | 20 (3)    | 3 (2)     | 6.2 (18)  | -3 (2)    |
| C26  | 28 (3)    | 54 (4)     | 22 (3)    | -5 (3)    | 2 (2)     | -10 (3)   |
| C5   | 47 (3)    | 44 (3)     | 19 (3)    | 0 (2)     | 4 (2)     | -18 (3)   |
| C32  | 26 (3)    | 37 (3)     | 25 (3)    | 6 (2)     | -16 (2)   | -16 (2)   |
| C38  | 20 (2)    | 23 (3)     | 27 (3)    | 2 (2)     | -4.5 (19) | -8 (2)    |
| C11  | 20 (2)    | 34 (3)     | 22 (3)    | -3 (2)    | -5.5 (19) | -15 (2)   |
| C18  | 30 (3)    | 31 (3)     | 13 (2)    | -5 (2)    | -0.7 (19) | -10 (2)   |
| C39  | 34 (3)    | 31 (3)     | 24 (3)    | 8 (2)     | -14 (2)   | -5 (2)    |
| C42  | 21 (2)    | 26 (3)     | 21 (3)    | 7 (2)     | -5.0 (19) | -7 (2)    |
| C41  | 30 (3)    | 29 (3)     | 29 (3)    | 7 (2)     | 1 (2)     | -12 (2)   |
| C34  | 11 (2)    | 20 (2)     | 16 (2)    | 3.6 (18)  | -2.8 (17) | -3.7 (18) |
| C8   | 14 (2)    | 20 (2)     | 9 (2)     | 1.0 (17)  | -0.3 (16) | -8.8 (18) |
| C13  | 13 (2)    | 21 (2)     | 13 (2)    | 3.6 (18)  | -1.9 (16) | -7.5 (18) |
| C22  | 8 (2)     | 22 (2)     | 11 (2)    | 0.8 (17)  | -1.8 (16) | -5.1 (17) |
| C1   | 12 (2)    | 28 (3)     | 6 (2)     | 3.0 (18)  | -0.8 (16) | -6.0 (18) |
| C2   | 18 (2)    | 23 (3)     | 20 (2)    | -4.0 (19) | 0.6 (18)  | -6 (2)    |
| C15  | 15 (2)    | 22 (2)     | 12 (2)    | 2.5 (18)  | -1.9 (16) | -9.1 (19) |
| C35  | 11 (2)    | 16 (2)     | 19 (2)    | -2.5 (18) | 0.9 (17)  | -5.2 (17) |
| C29  | 9 (2)     | 16 (2)     | 17 (2)    | -1.1 (17) | -1.3 (16) | -1.2 (17) |
| C36  | 12 (2)    | 16 (2)     | 16 (2)    | -3.3 (17) | 2.2 (16)  | -4.9 (17) |
| C37  | 17 (2)    | 17 (2)     | 15 (2)    | -3.5 (18) | 0.9 (17)  | -1.8 (18) |
| C12  | 12 (2)    | 25 (3)     | 19 (2)    | 0.8 (19)  | -1.2 (17) | -2.1 (19) |

| Atom | U <sub>11</sub> | U <sub>22</sub> | U <sub>33</sub> | U <sub>23</sub> | U <sub>13</sub> | U <sub>12</sub> |
|------|-----------------|-----------------|-----------------|-----------------|-----------------|-----------------|
| C14  | 8 (2)           | 18 (2)          | 17 (2)          | 3.4 (18)        | -1.6 (16)       | -2.7 (17)       |
| C24  | 15 (2)          | 32 (3)          | 22 (3)          | -12 (2)         | -0.4 (18)       | -4 (2)          |
| C16  | 14 (2)          | 20 (2)          | 14 (2)          | 1.4 (18)        | -0.8 (17)       | -7.7 (18)       |
| C21  | 15 (2)          | 24 (3)          | 13 (2)          | 0.3 (18)        | 0.1 (17)        | -5.9 (19)       |
| C25  | 10 (2)          | 44 (3)          | 13 (2)          | -1 (2)          | -3.8 (17)       | -6 (2)          |
| C30  | 16 (2)          | 25 (3)          | 16 (2)          | 3.5 (19)        | -3.8 (17)       | -5.7 (19)       |
| C31  | 23 (3)          | 31 (3)          | 20 (3)          | 9 (2)           | -8.6 (19)       | -8 (2)          |
| C7   | 19 (2)          | 26 (3)          | 18 (2)          | -4.3 (19)       | -4.2 (18)       | -9 (2)          |
| C23  | 16 (2)          | 25 (3)          | 19 (2)          | -5.4 (19)       | -2.1 (18)       | -7.1 (19)       |
| C4   | 19 (2)          | 31 (3)          | 17 (2)          | -1 (2)          | -1.9 (18)       | -11 (2)         |
| C28  | 19 (2)          | 18 (2)          | 18 (2)          | -0.3 (18)       | -3.6 (18)       | -4.4 (19)       |
| C33  | 18 (2)          | 31 (3)          | 24 (3)          | 4 (2)           | -8.8 (19)       | -14 (2)         |
| C27  | 16 (2)          | 31 (3)          | 19 (2)          | 5 (2)           | 0.3 (18)        | -6 (2)          |
| C17  | 18 (2)          | 19 (2)          | 19 (2)          | -1.2 (19)       | -4.6 (18)       | -3.9 (19)       |
| C9   | 15 (2)          | 24 (3)          | 19 (2)          | -4.8 (19)       | 2.7 (18)        | -5.0 (19)       |
| C10  | 25 (3)          | 30 (3)          | 17 (2)          | -8 (2)          | -1.6 (19)       | -15 (2)         |
| C6   | 23 (3)          | 33 (3)          | 16 (2)          | -12 (2)         | 2.7 (19)        | -8 (2)          |
| C3   | 27 (3)          | 26 (3)          | 17 (2)          | 2 (2)           | -1.3 (19)       | -8 (2)          |
| O1S  | 23.2 (18)       | 23.0 (18)       | 30 (2)          | -7.3 (15)       | 0.1 (14)        | -8.9 (15)       |
| C1S  | 31 (3)          | 31 (3)          | 27 (3)          | -7 (2)          | 7 (2)           | -14 (2)         |
| C2S  | 24 (3)          | 46 (4)          | 33 (3)          | -3 (3)          | 0 (2)           | 2 (2)           |
| O3S  | 26.8 (19)       | 24.4 (19)       | 24.6 (19)       | 2.9 (15)        | 2.9 (14)        | 2.6 (15)        |
| C6S  | 52 (4)          | 41 (4)          | 38 (4)          | 10 (3)          | 5 (3)           | -11 (3)         |
| C5S  | 30 (3)          | 33 (3)          | 29 (3)          | 1 (2)           | 7 (2)           | -6 (2)          |
| O2S  | 31 (2)          | 36 (2)          | 47 (3)          | 13.8 (18)       | -20.3 (17)      | -15.3 (18)      |
| C3S  | 21 (2)          | 28 (3)          | 28 (3)          | 3 (2)           | -2 (2)          | -9 (2)          |
| C4S  | 23 (3)          | 37 (3)          | 29 (3)          | 5 (2)           | -3 (2)          | -10 (2)         |
| K5   | 17.5 (5)        | 22.0 (5)        | 21.5 (5)        | -0.7 (4)        | -0.2 (4)        | -3.1 (4)        |

**Table 4 Bond Lengths for K(EtOH)<sub>3</sub>[Yb(L)<sub>2</sub>] (CCDC 2016985).**

| Atom | Atom | Length (Å)  | Atom | Atom | Length (Å) |
|------|------|-------------|------|------|------------|
| Yb1  | S1   | 3.0672 (11) | C32  | C33  | 1.376 (6)  |
| Yb1  | S2   | 3.0452 (11) | C38  | C39  | 1.380 (7)  |
| Yb1  | O1   | 2.401 (3)   | C38  | C37  | 1.391 (6)  |
| Yb1  | O6   | 2.226 (3)   | C11  | C12  | 1.368 (6)  |
| Yb1  | O3   | 2.218 (3)   | C11  | C10  | 1.387 (6)  |
| Yb1  | O4   | 2.373 (3)   | C18  | C17  | 1.385 (6)  |
| Yb1  | N1   | 2.417 (3)   | C42  | C41  | 1.380 (6)  |
| Yb1  | N4   | 2.405 (3)   | C42  | C37  | 1.394 (6)  |
| Yb1  | N2   | 2.424 (3)   | C34  | C35  | 1.453 (6)  |
| Yb1  | N5   | 2.426 (4)   | C34  | C29  | 1.408 (6)  |
| Yb1  | C15  | 3.084 (4)   | C34  | C33  | 1.406 (6)  |
| Yb1  | C36  | 3.088 (4)   | C8   | C13  | 1.417 (6)  |
| S1   | O1   | 1.476 (3)   | C8   | C9   | 1.414 (6)  |
| S1   | O2   | 1.436 (3)   | C13  | C12  | 1.416 (6)  |
| S1   | N1   | 1.572 (3)   | C13  | C14  | 1.435 (6)  |
| S1   | C1   | 1.767 (4)   | C22  | C23  | 1.388 (6)  |
| S1   | K5   | 3.4838 (14) | C22  | C28  | 1.391 (6)  |
| S2   | O4   | 1.472 (3)   | C1   | C2   | 1.387 (6)  |
| S2   | O5   | 1.446 (3)   | C1   | C7   | 1.391 (6)  |
| S2   | N4   | 1.569 (4)   | C2   | C3   | 1.390 (6)  |
| S2   | C22  | 1.770 (4)   | C15  | C16  | 1.486 (6)  |
| S2   | K5   | 3.6490 (14) | C29  | C30  | 1.408 (6)  |
| O1   | K5   | 3.083 (3)   | C36  | C37  | 1.493 (6)  |
| O6   | C36  | 1.293 (5)   | C24  | C25  | 1.396 (7)  |
| O3   | C15  | 1.288 (5)   | C24  | C23  | 1.389 (6)  |
| O2   | K5   | 2.825 (3)   | C16  | C21  | 1.400 (6)  |
| O5   | K5   | 2.762 (3)   | C16  | C17  | 1.395 (6)  |
| N6   | N5   | 1.422 (5)   | C25  | C27  | 1.381 (7)  |
| N6   | C36  | 1.327 (5)   | C30  | C31  | 1.385 (6)  |
| N1   | C8   | 1.401 (5)   | C7   | C6   | 1.386 (6)  |
| N4   | C29  | 1.409 (5)   | C4   | C6   | 1.389 (7)  |
| N2   | N3   | 1.418 (5)   | C4   | C3   | 1.389 (6)  |
| N2   | C14  | 1.298 (5)   | C28  | C27  | 1.382 (6)  |
| N3   | C15  | 1.314 (5)   | C9   | C10  | 1.387 (6)  |
| N5   | C35  | 1.292 (5)   | O1S  | C1S  | 1.427 (5)  |
| C19  | C20  | 1.398 (7)   | O1S  | K5   | 2.682 (3)  |
| C19  | C18  | 1.389 (6)   | C1S  | C2S  | 1.508 (7)  |
| C40  | C39  | 1.375 (7)   | O3S  | C5S  | 1.411 (5)  |
| C40  | C41  | 1.385 (7)   | O3S  | K5   | 2.677 (3)  |



| <b>Atom</b> | <b>Atom</b> | <b>Length (Å)</b> | <b>Atom</b> | <b>Atom</b> | <b>Length (Å)</b> |
|-------------|-------------|-------------------|-------------|-------------|-------------------|
| C20         | C21         | 1.374 (6)         | C6S         | C5S         | 1.496 (7)         |
| C26         | C25         | 1.500 (6)         | O2S         | C3S         | 1.434 (5)         |
| C5          | C4          | 1.503 (6)         | O2S         | K5          | 2.664 (4)         |
| C32         | C31         | 1.379 (7)         | C3S         | C4S         | 1.503 (6)         |

**Table 5 Bond Angles for K(EtOH)<sub>3</sub>[Yb(L)<sub>2</sub>] (CCDC 2016985).**

| Atom | Atom | Atom | Angle/°     | Atom | Atom | Atom | Angle/°    |
|------|------|------|-------------|------|------|------|------------|
| S1   | Yb1  | C15  | 149.74 (8)  | N3   | N2   | Yb1  | 114.9 (2)  |
| S1   | Yb1  | C36  | 90.54 (8)   | C14  | N2   | Yb1  | 133.7 (3)  |
| S2   | Yb1  | S1   | 91.71 (3)   | C14  | N2   | N3   | 111.3 (3)  |
| S2   | Yb1  | C15  | 97.43 (8)   | C15  | N3   | N2   | 111.5 (3)  |
| S2   | Yb1  | C36  | 148.73 (8)  | N6   | N5   | Yb1  | 115.6 (2)  |
| O1   | Yb1  | S1   | 28.09 (7)   | C35  | N5   | Yb1  | 133.8 (3)  |
| O1   | Yb1  | S2   | 85.65 (7)   | C35  | N5   | N6   | 110.6 (4)  |
| O1   | Yb1  | N1   | 58.51 (10)  | C18  | C19  | C20  | 119.2 (4)  |
| O1   | Yb1  | N4   | 84.14 (11)  | C39  | C40  | C41  | 119.3 (5)  |
| O1   | Yb1  | N2   | 131.06 (11) | C21  | C20  | C19  | 120.6 (4)  |
| O1   | Yb1  | N5   | 78.56 (11)  | C33  | C32  | C31  | 119.3 (4)  |
| O1   | Yb1  | C15  | 176.60 (11) | C39  | C38  | C37  | 120.7 (5)  |
| O1   | Yb1  | C36  | 81.83 (10)  | C12  | C11  | C10  | 118.8 (4)  |
| O6   | Yb1  | S1   | 86.44 (8)   | C17  | C18  | C19  | 120.1 (4)  |
| O6   | Yb1  | S2   | 169.46 (7)  | C40  | C39  | C38  | 120.7 (4)  |
| O6   | Yb1  | O1   | 87.88 (10)  | C41  | C42  | C37  | 120.6 (4)  |
| O6   | Yb1  | O4   | 159.99 (10) | C42  | C41  | C40  | 120.4 (5)  |
| O6   | Yb1  | N1   | 83.22 (11)  | C29  | C34  | C35  | 126.2 (4)  |
| O6   | Yb1  | N4   | 140.15 (11) | C33  | C34  | C35  | 114.5 (4)  |
| O6   | Yb1  | N2   | 82.14 (11)  | C33  | C34  | C29  | 119.3 (4)  |
| O6   | Yb1  | N5   | 67.57 (11)  | N1   | C8   | C13  | 118.5 (4)  |
| O6   | Yb1  | C15  | 89.29 (11)  | N1   | C8   | C9   | 123.3 (4)  |
| O6   | Yb1  | C36  | 21.19 (10)  | C9   | C8   | C13  | 118.2 (4)  |
| O3   | Yb1  | S1   | 169.71 (8)  | C8   | C13  | C14  | 126.5 (4)  |
| O3   | Yb1  | S2   | 87.67 (8)   | C12  | C13  | C8   | 118.5 (4)  |
| O3   | Yb1  | O1   | 161.58 (9)  | C12  | C13  | C14  | 115.0 (4)  |
| O3   | Yb1  | O6   | 95.98 (11)  | C23  | C22  | S2   | 120.7 (3)  |
| O3   | Yb1  | O4   | 93.36 (11)  | C23  | C22  | C28  | 120.5 (4)  |
| O3   | Yb1  | N1   | 139.77 (10) | C28  | C22  | S2   | 118.8 (3)  |
| O3   | Yb1  | N4   | 81.38 (11)  | C2   | C1   | S1   | 119.2 (3)  |
| O3   | Yb1  | N2   | 67.36 (11)  | C2   | C1   | C7   | 120.6 (4)  |
| O3   | Yb1  | N5   | 86.26 (11)  | C7   | C1   | S1   | 120.2 (4)  |
| O3   | Yb1  | C15  | 21.01 (10)  | C1   | C2   | C3   | 119.4 (4)  |
| O3   | Yb1  | C36  | 95.31 (11)  | O3   | C15  | Yb1  | 38.11 (19) |
| O4   | Yb1  | S1   | 81.43 (7)   | O3   | C15  | N3   | 124.7 (4)  |
| O4   | Yb1  | S2   | 28.21 (7)   | O3   | C15  | C16  | 118.8 (4)  |
| O4   | Yb1  | O1   | 88.82 (10)  | N3   | C15  | Yb1  | 86.7 (3)   |
| O4   | Yb1  | N1   | 78.24 (11)  | N3   | C15  | C16  | 116.5 (4)  |
| O4   | Yb1  | N4   | 58.88 (11)  | C16  | C15  | Yb1  | 156.5 (3)  |
| O4   | Yb1  | N2   | 85.20 (11)  | N5   | C35  | C34  | 128.8 (4)  |

| Atom | Atom | Atom | Angle/°     | Atom | Atom | Atom | Angle/°    |
|------|------|------|-------------|------|------|------|------------|
| O4   | Yb1  | N5   | 130.87 (10) | C34  | C29  | N4   | 118.4 (4)  |
| O4   | Yb1  | C15  | 93.20 (11)  | C34  | C29  | C30  | 118.0 (4)  |
| O4   | Yb1  | C36  | 170.63 (10) | C30  | C29  | N4   | 123.5 (4)  |
| N1   | Yb1  | S1   | 30.49 (8)   | O6   | C36  | Yb1  | 38.48 (18) |
| N1   | Yb1  | S2   | 100.37 (8)  | O6   | C36  | N6   | 125.5 (4)  |
| N1   | Yb1  | N2   | 72.74 (11)  | O6   | C36  | C37  | 118.7 (4)  |
| N1   | Yb1  | N5   | 128.80 (11) | N6   | C36  | Yb1  | 87.2 (3)   |
| N1   | Yb1  | C15  | 119.25 (11) | N6   | C36  | C37  | 115.8 (4)  |
| N1   | Yb1  | C36  | 97.26 (11)  | C37  | C36  | Yb1  | 156.3 (3)  |
| N4   | Yb1  | S1   | 103.15 (8)  | C38  | C37  | C42  | 118.3 (4)  |
| N4   | Yb1  | S2   | 30.68 (8)   | C38  | C37  | C36  | 119.5 (4)  |
| N4   | Yb1  | N1   | 123.66 (11) | C42  | C37  | C36  | 122.1 (4)  |
| N4   | Yb1  | N2   | 130.81 (11) | C11  | C12  | C13  | 122.5 (4)  |
| N4   | Yb1  | N5   | 72.59 (11)  | N2   | C14  | C13  | 128.8 (4)  |
| N4   | Yb1  | C15  | 99.24 (11)  | C23  | C24  | C25  | 121.2 (4)  |
| N4   | Yb1  | C36  | 119.03 (11) | C21  | C16  | C15  | 122.7 (4)  |
| N2   | Yb1  | S1   | 103.21 (8)  | C17  | C16  | C15  | 119.0 (4)  |
| N2   | Yb1  | S2   | 108.37 (8)  | C17  | C16  | C21  | 118.3 (4)  |
| N2   | Yb1  | N5   | 137.48 (11) | C20  | C21  | C16  | 120.7 (4)  |
| N2   | Yb1  | C15  | 46.54 (11)  | C24  | C25  | C26  | 121.0 (5)  |
| N2   | Yb1  | C36  | 101.42 (11) | C27  | C25  | C26  | 120.7 (5)  |
| N5   | Yb1  | S1   | 103.87 (8)  | C27  | C25  | C24  | 118.3 (4)  |
| N5   | Yb1  | S2   | 102.93 (8)  | C31  | C30  | C29  | 121.1 (4)  |
| N5   | Yb1  | C15  | 102.08 (11) | C32  | C31  | C30  | 120.6 (4)  |
| N5   | Yb1  | C36  | 46.51 (11)  | C6   | C7   | C1   | 119.0 (4)  |
| C15  | Yb1  | C36  | 96.17 (11)  | C22  | C23  | C24  | 119.1 (4)  |
| Yb1  | S1   | K5   | 92.03 (3)   | C6   | C4   | C5   | 121.2 (4)  |
| O1   | S1   | Yb1  | 50.00 (12)  | C6   | C4   | C3   | 118.6 (4)  |
| O1   | S1   | N1   | 101.11 (18) | C3   | C4   | C5   | 120.2 (5)  |
| O1   | S1   | C1   | 107.65 (19) | C27  | C28  | C22  | 119.3 (4)  |
| O1   | S1   | K5   | 62.13 (12)  | C32  | C33  | C34  | 121.6 (4)  |
| O2   | S1   | Yb1  | 130.02 (13) | C25  | C27  | C28  | 121.6 (4)  |
| O2   | S1   | O1   | 113.59 (18) | C18  | C17  | C16  | 121.0 (4)  |
| O2   | S1   | N1   | 118.01 (19) | C10  | C9   | C8   | 121.0 (4)  |
| O2   | S1   | C1   | 106.6 (2)   | C11  | C10  | C9   | 120.9 (4)  |
| O2   | S1   | K5   | 51.58 (12)  | C7   | C6   | C4   | 121.5 (4)  |
| N1   | S1   | Yb1  | 51.25 (13)  | C4   | C3   | C2   | 120.9 (5)  |
| N1   | S1   | C1   | 109.49 (19) | C1S  | O1S  | K5   | 122.3 (3)  |
| N1   | S1   | K5   | 124.96 (13) | O1S  | C1S  | C2S  | 112.8 (4)  |
| C1   | S1   | Yb1  | 123.20 (16) | C5S  | O3S  | K5   | 133.2 (3)  |
| C1   | S1   | K5   | 125.48 (14) | O3S  | C5S  | C6S  | 110.4 (4)  |
| Yb1  | S2   | K5   | 89.26 (3)   | C3S  | O2S  | K5   | 135.7 (3)  |

| Atom | Atom | Atom | Angle/°     | Atom | Atom | Atom | Angle/°     |
|------|------|------|-------------|------|------|------|-------------|
| O4   | S2   | Yb1  | 49.60 (12)  | O2S  | C3S  | C4S  | 106.7 (4)   |
| O4   | S2   | N4   | 101.06 (18) | S1   | K5   | S2   | 75.86 (3)   |
| O4   | S2   | C22  | 107.74 (18) | O1   | K5   | S1   | 25.03 (6)   |
| O4   | S2   | K5   | 92.65 (12)  | O1   | K5   | S2   | 66.72 (6)   |
| O5   | S2   | Yb1  | 131.55 (13) | O2   | K5   | S1   | 23.47 (6)   |
| O5   | S2   | O4   | 114.94 (18) | O2   | K5   | S2   | 87.98 (7)   |
| O5   | S2   | N4   | 115.91 (18) | O2   | K5   | O1   | 48.47 (8)   |
| O5   | S2   | C22  | 105.79 (19) | O5   | K5   | S1   | 94.14 (7)   |
| O5   | S2   | K5   | 42.53 (12)  | O5   | K5   | S2   | 20.73 (6)   |
| N4   | S2   | Yb1  | 51.47 (13)  | O5   | K5   | O1   | 87.40 (8)   |
| N4   | S2   | C22  | 111.3 (2)   | O5   | K5   | O2   | 101.43 (9)  |
| N4   | S2   | K5   | 87.49 (13)  | O1S  | K5   | S1   | 112.59 (8)  |
| C22  | S2   | Yb1  | 122.53 (14) | O1S  | K5   | S2   | 93.21 (7)   |
| C22  | S2   | K5   | 148.21 (15) | O1S  | K5   | O1   | 134.00 (9)  |
| Yb1  | O1   | K5   | 118.33 (11) | O1S  | K5   | O2   | 92.26 (10)  |
| S1   | O1   | Yb1  | 101.91 (15) | O1S  | K5   | O5   | 77.08 (10)  |
| S1   | O1   | K5   | 92.84 (14)  | O3S  | K5   | S1   | 119.43 (8)  |
| C36  | O6   | Yb1  | 120.3 (2)   | O3S  | K5   | S2   | 163.50 (8)  |
| C15  | O3   | Yb1  | 120.9 (3)   | O3S  | K5   | O1   | 129.73 (9)  |
| S1   | O2   | K5   | 104.96 (16) | O3S  | K5   | O2   | 104.30 (10) |
| S2   | O4   | Yb1  | 102.19 (15) | O3S  | K5   | O5   | 142.86 (10) |
| S2   | O5   | K5   | 116.74 (16) | O3S  | K5   | O1S  | 75.60 (10)  |
| C36  | N6   | N5   | 110.6 (3)   | O2S  | K5   | S1   | 82.60 (8)   |
| S1   | N1   | Yb1  | 98.27 (16)  | O2S  | K5   | S2   | 90.67 (10)  |
| C8   | N1   | Yb1  | 139.2 (3)   | O2S  | K5   | O1   | 60.76 (9)   |
| C8   | N1   | S1   | 122.4 (3)   | O2S  | K5   | O2   | 102.55 (10) |
| S2   | N4   | Yb1  | 97.84 (16)  | O2S  | K5   | O5   | 102.85 (12) |
| C29  | N4   | Yb1  | 139.6 (3)   | O2S  | K5   | O1S  | 164.81 (11) |
| C29  | N4   | S2   | 122.5 (3)   | O2S  | K5   | O3S  | 97.20 (12)  |

**Table 6 Torsion Angles for K(EtOH)<sub>3</sub>[Yb(L)<sub>2</sub>] (CCDC 2016985).**

| A   | B  | C   | D   | Angle/°      | A  | B   | C   | D   | Angle/°      |
|-----|----|-----|-----|--------------|----|-----|-----|-----|--------------|
| Yb1 | S1 | O1  | K5  | -119.74 (14) | N1 | Yb1 | N2  | N3  | 178.0 (3)    |
| Yb1 | S1 | O2  | K5  | 52.62 (19)   | N1 | Yb1 | N2  | C14 | 3.2 (4)      |
| Yb1 | S1 | N1  | C8  | 177.5 (4)    | N1 | Yb1 | N5  | N6  | -55.9 (3)    |
| Yb1 | S1 | C1  | C2  | 11.8 (4)     | N1 | Yb1 | N5  | C35 | 124.2 (4)    |
| Yb1 | S1 | C1  | C7  | -166.0 (3)   | N1 | Yb1 | C15 | O3  | -169.3 (3)   |
| Yb1 | S1 | K5  | S2  | -23.21 (3)   | N1 | Yb1 | C15 | N3  | 5.8 (3)      |
| Yb1 | S1 | K5  | O1  | 41.73 (13)   | N1 | Yb1 | C15 | C16 | 178.6 (7)    |
| Yb1 | S1 | K5  | O2  | -142.49 (17) | N1 | Yb1 | C36 | O6  | -48.9 (3)    |
| Yb1 | S1 | K5  | O5  | -33.07 (7)   | N1 | Yb1 | C36 | N6  | 137.1 (2)    |
| Yb1 | S1 | K5  | O1S | -110.79 (8)  | N1 | Yb1 | C36 | C37 | -29.4 (7)    |
| Yb1 | S1 | K5  | O3S | 163.49 (10)  | N1 | S1  | O1  | Yb1 | -4.10 (19)   |
| Yb1 | S1 | K5  | O2S | 69.37 (10)   | N1 | S1  | O1  | K5  | -123.83 (15) |
| Yb1 | S2 | O5  | K5  | -7.3 (3)     | N1 | S1  | O2  | K5  | 113.99 (17)  |
| Yb1 | S2 | N4  | C29 | -179.7 (4)   | N1 | S1  | C1  | C2  | -44.0 (4)    |
| Yb1 | S2 | C22 | C23 | 33.7 (4)     | N1 | S1  | C1  | C7  | 138.2 (3)    |
| Yb1 | S2 | C22 | C28 | -148.2 (3)   | N1 | S1  | K5  | S2  | 19.10 (17)   |
| Yb1 | S2 | K5  | S1  | 23.37 (3)    | N1 | S1  | K5  | O1  | 84.0 (2)     |
| Yb1 | S2 | K5  | O1  | -1.29 (6)    | N1 | S1  | K5  | O2  | -100.2 (2)   |
| Yb1 | S2 | K5  | O2  | 43.71 (7)    | N1 | S1  | K5  | O5  | 9.24 (18)    |
| Yb1 | S2 | K5  | O5  | 174.52 (19)  | N1 | S1  | K5  | O1S | -68.48 (19)  |
| Yb1 | S2 | K5  | O1S | 135.86 (8)   | N1 | S1  | K5  | O3S | -154.20 (19) |
| Yb1 | S2 | K5  | O3S | -177.6 (3)   | N1 | S1  | K5  | O2S | 111.68 (19)  |
| Yb1 | S2 | K5  | O2S | -58.82 (8)   | N1 | C8  | C13 | C12 | -179.0 (4)   |
| Yb1 | O1 | K5  | S1  | -105.15 (18) | N1 | C8  | C13 | C14 | 1.8 (6)      |
| Yb1 | O1 | K5  | S2  | 1.86 (9)     | N1 | C8  | C9  | C10 | 178.5 (4)    |
| Yb1 | O1 | K5  | O2  | -107.40 (15) | N4 | Yb1 | S1  | O1  | 48.68 (18)   |
| Yb1 | O1 | K5  | O5  | 0.38 (13)    | N4 | Yb1 | S1  | O2  | -40.03 (19)  |
| Yb1 | O1 | K5  | O1S | -68.83 (17)  | N4 | Yb1 | S1  | N1  | -136.48 (18) |
| Yb1 | O1 | K5  | O3S | -179.50 (12) | N4 | Yb1 | S1  | C1  | 134.32 (18)  |
| Yb1 | O1 | K5  | O2S | 106.67 (16)  | N4 | Yb1 | S1  | K5  | -1.50 (9)    |
| Yb1 | O6 | C36 | N6  | 7.4 (5)      | N4 | Yb1 | S2  | O4  | -178.5 (2)   |
| Yb1 | O6 | C36 | C37 | -171.2 (3)   | N4 | Yb1 | S2  | O5  | 92.3 (2)     |
| Yb1 | O3 | C15 | N3  | -5.9 (6)     | N4 | Yb1 | S2  | C22 | -92.4 (2)    |
| Yb1 | O3 | C15 | C16 | 174.6 (3)    | N4 | Yb1 | S2  | K5  | 87.39 (16)   |
| Yb1 | N1 | C8  | C13 | -7.6 (6)     | N4 | Yb1 | O1  | S1  | -132.68 (17) |
| Yb1 | N1 | C8  | C9  | 172.6 (3)    | N4 | Yb1 | O1  | K5  | -32.83 (12)  |
| Yb1 | N4 | C29 | C34 | 8.6 (6)      | N4 | Yb1 | O6  | C36 | -5.6 (4)     |
| Yb1 | N4 | C29 | C30 | -169.2 (3)   | N4 | Yb1 | O3  | C15 | 148.0 (3)    |
| Yb1 | N2 | N3  | C15 | 7.1 (4)      | N4 | Yb1 | O4  | S2  | 0.90 (14)    |
| Yb1 | N2 | C14 | C13 | -8.4 (7)     | N4 | Yb1 | N1  | S1  | 53.7 (2)     |

| A   | B   | C   | D   | Angle/°      | A  | B   | C   | D   | Angle/°      |
|-----|-----|-----|-----|--------------|----|-----|-----|-----|--------------|
| Yb1 | N5  | C35 | C34 | -0.6 (7)     | N4 | Yb1 | N1  | C8  | -123.1 (4)   |
| Yb1 | C15 | C16 | C21 | -176.0 (5)   | N4 | Yb1 | N2  | N3  | -62.1 (3)    |
| Yb1 | C15 | C16 | C17 | 2.1 (10)     | N4 | Yb1 | N2  | C14 | 123.1 (4)    |
| Yb1 | C36 | C37 | C38 | -17.1 (9)    | N4 | Yb1 | N5  | N6  | -175.4 (3)   |
| Yb1 | C36 | C37 | C42 | 162.3 (5)    | N4 | Yb1 | N5  | C35 | 4.7 (4)      |
| S1  | Yb1 | S2  | O4  | 68.20 (16)   | N4 | Yb1 | C15 | O3  | -32.0 (3)    |
| S1  | Yb1 | S2  | O5  | -20.97 (18)  | N4 | Yb1 | C15 | N3  | 143.1 (3)    |
| S1  | Yb1 | S2  | N4  | -113.31 (16) | N4 | Yb1 | C15 | C16 | -44.1 (7)    |
| S1  | Yb1 | S2  | C22 | 154.29 (17)  | N4 | Yb1 | C36 | O6  | 175.9 (3)    |
| S1  | Yb1 | S2  | K5  | -25.92 (3)   | N4 | Yb1 | C36 | N6  | 1.9 (3)      |
| S1  | Yb1 | O1  | K5  | 99.85 (19)   | N4 | Yb1 | C36 | C37 | -164.6 (7)   |
| S1  | Yb1 | O6  | C36 | 100.8 (3)    | N4 | S2  | O4  | Yb1 | -1.20 (18)   |
| S1  | Yb1 | O3  | C15 | 31.1 (7)     | N4 | S2  | O5  | K5  | 53.0 (2)     |
| S1  | Yb1 | O4  | S2  | -110.19 (14) | N4 | S2  | C22 | C23 | -23.3 (4)    |
| S1  | Yb1 | N1  | C8  | -176.7 (5)   | N4 | S2  | C22 | C28 | 154.8 (3)    |
| S1  | Yb1 | N4  | S2  | 70.51 (15)   | N4 | S2  | K5  | S1  | 74.84 (13)   |
| S1  | Yb1 | N4  | C29 | -109.9 (4)   | N4 | S2  | K5  | O1  | 50.18 (14)   |
| S1  | Yb1 | N2  | N3  | 177.1 (2)    | N4 | S2  | K5  | O2  | 95.18 (14)   |
| S1  | Yb1 | N2  | C14 | 2.3 (4)      | N4 | S2  | K5  | O5  | -134.0 (2)   |
| S1  | Yb1 | N5  | N6  | -75.8 (3)    | N4 | S2  | K5  | O1S | -172.67 (15) |
| S1  | Yb1 | N5  | C35 | 104.4 (4)    | N4 | S2  | K5  | O3S | -126.1 (3)   |
| S1  | Yb1 | C15 | O3  | -169.5 (2)   | N4 | S2  | K5  | O2S | -7.36 (15)   |
| S1  | Yb1 | C15 | N3  | 5.6 (4)      | N4 | C29 | C30 | C31 | 176.8 (4)    |
| S1  | Yb1 | C15 | C16 | 178.5 (6)    | N2 | Yb1 | S1  | O1  | -173.23 (18) |
| S1  | Yb1 | C36 | O6  | -78.7 (3)    | N2 | Yb1 | S1  | O2  | 98.06 (19)   |
| S1  | Yb1 | C36 | N6  | 107.3 (2)    | N2 | Yb1 | S1  | N1  | 1.61 (19)    |
| S1  | Yb1 | C36 | C37 | -59.2 (7)    | N2 | Yb1 | S1  | C1  | -87.59 (19)  |
| S1  | O1  | K5  | S2  | 107.01 (13)  | N2 | Yb1 | S1  | K5  | 136.59 (9)   |
| S1  | O1  | K5  | O2  | -2.24 (11)   | N2 | Yb1 | S2  | O4  | -36.33 (18)  |
| S1  | O1  | K5  | O5  | 105.53 (14)  | N2 | Yb1 | S2  | O5  | -125.5 (2)   |
| S1  | O1  | K5  | O1S | 36.3 (2)     | N2 | Yb1 | S2  | N4  | 142.16 (18)  |
| S1  | O1  | K5  | O3S | -74.35 (18)  | N2 | Yb1 | S2  | C22 | 49.76 (19)   |
| S1  | O1  | K5  | O2S | -148.18 (18) | N2 | Yb1 | S2  | K5  | -130.45 (9)  |
| S1  | O2  | K5  | S2  | -57.81 (15)  | N2 | Yb1 | O1  | S1  | 8.8 (2)      |
| S1  | O2  | K5  | O1  | 2.38 (12)    | N2 | Yb1 | O1  | K5  | 108.61 (15)  |
| S1  | O2  | K5  | O5  | -73.68 (17)  | N2 | Yb1 | O6  | C36 | -155.4 (3)   |
| S1  | O2  | K5  | O1S | -150.95 (16) | N2 | Yb1 | O3  | C15 | 6.8 (3)      |
| S1  | O2  | K5  | O3S | 133.34 (16)  | N2 | Yb1 | O4  | S2  | 145.65 (16)  |
| S1  | O2  | K5  | O2S | 32.43 (19)   | N2 | Yb1 | N1  | S1  | -178.35 (19) |
| S1  | N1  | C8  | C13 | 176.3 (3)    | N2 | Yb1 | N1  | C8  | 4.9 (4)      |
| S1  | N1  | C8  | C9  | -3.6 (6)     | N2 | Yb1 | N4  | S2  | -50.3 (2)    |
| S1  | C1  | C2  | C3  | -177.2 (3)   | N2 | Yb1 | N4  | C29 | 129.3 (4)    |

| <b>A</b> | <b>B</b> | <b>C</b> | <b>D</b> | <b>Angle/°</b> | <b>A</b> | <b>B</b> | <b>C</b> | <b>D</b> | <b>Angle/°</b> |
|----------|----------|----------|----------|----------------|----------|----------|----------|----------|----------------|
| S1       | C1       | C7       | C6       | 176.8 (3)      | N2       | Yb1      | N5       | N6       | 52.4 (3)       |
| S2       | Yb1      | S1       | O1       | 77.45 (16)     | N2       | Yb1      | N5       | C35      | -127.5 (4)     |
| S2       | Yb1      | S1       | O2       | -11.26 (17)    | N2       | Yb1      | C15      | O3       | -171.3 (4)     |
| S2       | Yb1      | S1       | N1       | -107.71 (17)   | N2       | Yb1      | C15      | N3       | 3.8 (2)        |
| S2       | Yb1      | S1       | C1       | 163.09 (17)    | N2       | Yb1      | C15      | C16      | 176.7 (8)      |
| S2       | Yb1      | S1       | K5       | 27.26 (3)      | N2       | Yb1      | C36      | O6       | 24.9 (3)       |
| S2       | Yb1      | O1       | S1       | -101.91 (15)   | N2       | Yb1      | C36      | N6       | -149.1 (2)     |
| S2       | Yb1      | O1       | K5       | -2.05 (10)     | N2       | Yb1      | C36      | C37      | 44.4 (7)       |
| S2       | Yb1      | O6       | C36      | 20.6 (6)       | N2       | N3       | C15      | Yb1      | -5.0 (3)       |
| S2       | Yb1      | O3       | C15      | 117.8 (3)      | N2       | N3       | C15      | O3       | -1.4 (6)       |
| S2       | Yb1      | N1       | S1       | 75.47 (15)     | N2       | N3       | C15      | C16      | 178.1 (3)      |
| S2       | Yb1      | N1       | C8       | -101.3 (4)     | N3       | N2       | C14      | C13      | 176.7 (4)      |
| S2       | Yb1      | N4       | C29      | 179.6 (5)      | N3       | C15      | C16      | C21      | -3.9 (6)       |
| S2       | Yb1      | N2       | N3       | -86.6 (3)      | N3       | C15      | C16      | C17      | 174.2 (4)      |
| S2       | Yb1      | N2       | C14      | 98.7 (4)       | N5       | Yb1      | S1       | O1       | -26.32 (18)    |
| S2       | Yb1      | N5       | N6       | -170.8 (2)     | N5       | Yb1      | S1       | O2       | -115.03 (19)   |
| S2       | Yb1      | N5       | C35      | 9.3 (4)        | N5       | Yb1      | S1       | N1       | 148.52 (18)    |
| S2       | Yb1      | C15      | O3       | -63.0 (3)      | N5       | Yb1      | S1       | C1       | 59.32 (18)     |
| S2       | Yb1      | C15      | N3       | 112.1 (2)      | N5       | Yb1      | S1       | K5       | -76.50 (9)     |
| S2       | Yb1      | C15      | C16      | -75.0 (7)      | N5       | Yb1      | S2       | O4       | 172.85 (17)    |
| S2       | Yb1      | C36      | O6       | -172.9 (2)     | N5       | Yb1      | S2       | O5       | 83.7 (2)       |
| S2       | Yb1      | C36      | N6       | 13.1 (3)       | N5       | Yb1      | S2       | N4       | -8.66 (18)     |
| S2       | Yb1      | C36      | C37      | -153.4 (6)     | N5       | Yb1      | S2       | C22      | -101.07 (18)   |
| S2       | O5       | K5       | S1       | 27.98 (18)     | N5       | Yb1      | S2       | K5       | 78.73 (8)      |
| S2       | O5       | K5       | O1       | 3.85 (18)      | N5       | Yb1      | O1       | S1       | 153.95 (18)    |
| S2       | O5       | K5       | O2       | 50.5 (2)       | N5       | Yb1      | O1       | K5       | -106.20 (13)   |
| S2       | O5       | K5       | O1S      | 140.2 (2)      | N5       | Yb1      | O6       | C36      | -5.8 (3)       |
| S2       | O5       | K5       | O3S      | -176.30 (17)   | N5       | Yb1      | O3       | C15      | -139.0 (3)     |
| S2       | O5       | K5       | O2S      | -55.4 (2)      | N5       | Yb1      | O4       | S2       | -9.2 (2)       |
| S2       | N4       | C29      | C34      | -171.8 (3)     | N5       | Yb1      | N1       | S1       | -40.6 (2)      |
| S2       | N4       | C29      | C30      | 10.3 (6)       | N5       | Yb1      | N1       | C8       | 142.7 (4)      |
| S2       | C22      | C23      | C24      | 176.8 (3)      | N5       | Yb1      | N4       | S2       | 171.15 (18)    |
| S2       | C22      | C28      | C27      | -178.2 (3)     | N5       | Yb1      | N4       | C29      | -9.2 (4)       |
| O1       | Yb1      | S1       | O2       | -88.7 (2)      | N5       | Yb1      | N2       | N3       | 48.8 (3)       |
| O1       | Yb1      | S1       | N1       | 174.8 (2)      | N5       | Yb1      | N2       | C14      | -126.0 (4)     |
| O1       | Yb1      | S1       | C1       | 85.6 (2)       | N5       | Yb1      | C15      | O3       | 42.0 (3)       |
| O1       | Yb1      | S1       | K5       | -50.18 (16)    | N5       | Yb1      | C15      | N3       | -142.9 (3)     |
| O1       | Yb1      | S2       | O4       | 95.65 (17)     | N5       | Yb1      | C15      | C16      | 30.0 (7)       |
| O1       | Yb1      | S2       | O5       | 6.48 (19)      | N5       | Yb1      | C36      | O6       | 172.6 (3)      |
| O1       | Yb1      | S2       | N4       | -85.86 (17)    | N5       | Yb1      | C36      | N6       | -1.4 (2)       |
| O1       | Yb1      | S2       | C22      | -178.26 (18)   | N5       | Yb1      | C36      | C37      | -168.0 (8)     |
| O1       | Yb1      | S2       | K5       | 1.53 (7)       | N5       | N6       | C36      | Yb1      | 1.9 (3)        |

| <b>A</b> | <b>B</b> | <b>C</b> | <b>D</b> | <b>Angle/°</b> | <b>A</b> | <b>B</b> | <b>C</b> | <b>D</b> | <b>Angle/°</b> |
|----------|----------|----------|----------|----------------|----------|----------|----------|----------|----------------|
| O1       | Yb1      | O6       | C36      | 72.7 (3)       | N5       | N6       | C36      | O6       | -2.7 (6)       |
| O1       | Yb1      | O3       | C15      | -173.4 (3)     | N5       | N6       | C36      | C37      | 175.9 (3)      |
| O1       | Yb1      | O4       | S2       | -82.97 (15)    | C19      | C20      | C21      | C16      | 0.8 (7)        |
| O1       | Yb1      | N1       | S1       | -2.84 (13)     | C19      | C18      | C17      | C16      | 1.0 (7)        |
| O1       | Yb1      | N1       | C8       | -179.6 (4)     | C20      | C19      | C18      | C17      | -2.3 (7)       |
| O1       | Yb1      | N4       | S2       | 91.34 (16)     | C26      | C25      | C27      | C28      | -179.4 (4)     |
| O1       | Yb1      | N4       | C29      | -89.0 (4)      | C5       | C4       | C6       | C7       | -178.3 (4)     |
| O1       | Yb1      | N2       | N3       | 172.9 (2)      | C5       | C4       | C3       | C2       | 178.0 (4)      |
| O1       | Yb1      | N2       | C14      | -1.9 (5)       | C18      | C19      | C20      | C21      | 1.5 (7)        |
| O1       | Yb1      | N5       | N6       | -88.1 (3)      | C39      | C40      | C41      | C42      | -0.1 (8)       |
| O1       | Yb1      | N5       | C35      | 92.1 (4)       | C39      | C38      | C37      | C42      | -0.2 (7)       |
| O1       | Yb1      | C15      | O3       | 142.5 (17)     | C39      | C38      | C37      | C36      | 179.3 (4)      |
| O1       | Yb1      | C15      | N3       | -42 (2)        | C41      | C40      | C39      | C38      | 0.9 (8)        |
| O1       | Yb1      | C15      | C16      | 130.5 (17)     | C41      | C42      | C37      | C38      | 1.0 (7)        |
| O1       | Yb1      | C36      | O6       | -105.5 (3)     | C41      | C42      | C37      | C36      | -178.4 (4)     |
| O1       | Yb1      | C36      | N6       | 80.5 (2)       | C34      | C29      | C30      | C31      | -1.1 (6)       |
| O1       | Yb1      | C36      | C37      | -86.0 (7)      | C8       | C13      | C12      | C11      | 0.1 (7)        |
| O1       | S1       | O2       | K5       | -4.1 (2)       | C8       | C13      | C14      | N2       | 5.9 (8)        |
| O1       | S1       | N1       | Yb1      | 4.02 (18)      | C8       | C9       | C10      | C11      | 1.0 (7)        |
| O1       | S1       | N1       | C8       | -178.5 (3)     | C13      | C8       | C9       | C10      | -1.4 (6)       |
| O1       | S1       | C1       | C2       | 65.1 (4)       | C22      | S2       | O4       | Yb1      | -117.97 (18)   |
| O1       | S1       | C1       | C7       | -112.7 (4)     | C22      | S2       | O5       | K5       | 176.82 (17)    |
| O1       | S1       | K5       | S2       | -64.94 (13)    | C22      | S2       | N4       | Yb1      | 115.32 (17)    |
| O1       | S1       | K5       | O2       | 175.8 (2)      | C22      | S2       | N4       | C29      | -64.4 (4)      |
| O1       | S1       | K5       | O5       | -74.80 (15)    | C22      | S2       | K5       | S1       | -157.0 (3)     |
| O1       | S1       | K5       | O1S      | -152.52 (15)   | C22      | S2       | K5       | O1       | 178.4 (3)      |
| O1       | S1       | K5       | O3S      | 121.76 (16)    | C22      | S2       | K5       | O2       | -136.6 (3)     |
| O1       | S1       | K5       | O2S      | 27.64 (16)     | C22      | S2       | K5       | O5       | -5.8 (3)       |
| O6       | Yb1      | S1       | O1       | -92.17 (17)    | C22      | S2       | K5       | O1S      | -44.5 (3)      |
| O6       | Yb1      | S1       | O2       | 179.12 (19)    | C22      | S2       | K5       | O3S      | 2.1 (4)        |
| O6       | Yb1      | S1       | N1       | 82.68 (18)     | C22      | S2       | K5       | O2S      | 120.8 (3)      |
| O6       | Yb1      | S1       | C1       | -6.53 (18)     | C22      | C28      | C27      | C25      | 1.5 (7)        |
| O6       | Yb1      | S1       | K5       | -142.35 (8)    | C1       | S1       | O1       | Yb1      | -118.88 (17)   |
| O6       | Yb1      | S2       | O4       | 147.9 (4)      | C1       | S1       | O1       | K5       | 121.38 (16)    |
| O6       | Yb1      | S2       | O5       | 58.7 (5)       | C1       | S1       | O2       | K5       | -122.45 (17)   |
| O6       | Yb1      | S2       | N4       | -33.6 (5)      | C1       | S1       | N1       | Yb1      | 117.43 (18)    |
| O6       | Yb1      | S2       | C22      | -126.0 (4)     | C1       | S1       | N1       | C8       | -65.1 (4)      |
| O6       | Yb1      | S2       | K5       | 53.8 (4)       | C1       | S1       | K5       | S2       | -157.47 (19)   |
| O6       | Yb1      | O1       | S1       | 86.41 (16)     | C1       | S1       | K5       | O1       | -92.5 (2)      |
| O6       | Yb1      | O1       | K5       | -173.74 (12)   | C1       | S1       | K5       | O2       | 83.2 (2)       |
| O6       | Yb1      | O3       | C15      | -72.1 (3)      | C1       | S1       | K5       | O5       | -167.3 (2)     |
| O6       | Yb1      | O4       | S2       | -163.5 (2)     | C1       | S1       | K5       | O1S      | 114.9 (2)      |



| <b>A</b> | <b>B</b> | <b>C</b> | <b>D</b> | <b>Angle/°</b> | <b>A</b> | <b>B</b> | <b>C</b> | <b>D</b> | <b>Angle/°</b> |
|----------|----------|----------|----------|----------------|----------|----------|----------|----------|----------------|
| O6       | Yb1      | N1       | S1       | -94.51 (16)    | C1       | S1       | K5       | O3S      | 29.2 (2)       |
| O6       | Yb1      | N1       | C8       | 88.8 (4)       | C1       | S1       | K5       | O2S      | -64.9 (2)      |
| O6       | Yb1      | N4       | S2       | 170.91 (13)    | C1       | C2       | C3       | C4       | 0.9 (7)        |
| O6       | Yb1      | N4       | C29      | -9.5 (5)       | C1       | C7       | C6       | C4       | -0.2 (7)       |
| O6       | Yb1      | N2       | N3       | 92.7 (3)       | C2       | C1       | C7       | C6       | -0.9 (6)       |
| O6       | Yb1      | N2       | C14      | -82.1 (4)      | C15      | Yb1      | S1       | O1       | -174.6 (2)     |
| O6       | Yb1      | N5       | N6       | 4.4 (2)        | C15      | Yb1      | S1       | O2       | 96.7 (2)       |
| O6       | Yb1      | N5       | C35      | -175.5 (4)     | C15      | Yb1      | S1       | N1       | 0.2 (2)        |
| O6       | Yb1      | C15      | O3       | 108.8 (3)      | C15      | Yb1      | S1       | C1       | -89.0 (2)      |
| O6       | Yb1      | C15      | N3       | -76.0 (3)      | C15      | Yb1      | S1       | K5       | 135.20 (16)    |
| O6       | Yb1      | C15      | C16      | 96.8 (7)       | C15      | Yb1      | S2       | O4       | -82.88 (17)    |
| O6       | Yb1      | C36      | N6       | -174.0 (4)     | C15      | Yb1      | S2       | O5       | -172.1 (2)     |
| O6       | Yb1      | C36      | C37      | 19.5 (6)       | C15      | Yb1      | S2       | N4       | 95.61 (18)     |
| O6       | C36      | C37      | C38      | -3.4 (6)       | C15      | Yb1      | S2       | C22      | 3.20 (18)      |
| O6       | C36      | C37      | C42      | 176.0 (4)      | C15      | Yb1      | S2       | K5       | -177.00 (8)    |
| O3       | Yb1      | S1       | O1       | 163.8 (5)      | C15      | Yb1      | O1       | S1       | 52.7 (19)      |
| O3       | Yb1      | S1       | O2       | 75.1 (5)       | C15      | Yb1      | O1       | K5       | 152.6 (18)     |
| O3       | Yb1      | S1       | N1       | -21.3 (5)      | C15      | Yb1      | O6       | C36      | -109.2 (3)     |
| O3       | Yb1      | S1       | C1       | -110.5 (5)     | C15      | Yb1      | O4       | S2       | 99.77 (16)     |
| O3       | Yb1      | S1       | K5       | 113.7 (4)      | C15      | Yb1      | N1       | S1       | -179.87 (14)   |
| O3       | Yb1      | S2       | O4       | -101.53 (17)   | C15      | Yb1      | N1       | C8       | 3.4 (4)        |
| O3       | Yb1      | S2       | O5       | 169.30 (19)    | C15      | Yb1      | N4       | S2       | -88.99 (16)    |
| O3       | Yb1      | S2       | N4       | 76.97 (18)     | C15      | Yb1      | N4       | C29      | 90.6 (4)       |
| O3       | Yb1      | S2       | C22      | -15.44 (18)    | C15      | Yb1      | N2       | N3       | -3.9 (2)       |
| O3       | Yb1      | S2       | K5       | 164.35 (8)     | C15      | Yb1      | N2       | C14      | -178.6 (5)     |
| O3       | Yb1      | O1       | S1       | -171.0 (3)     | C15      | Yb1      | N5       | N6       | 88.5 (3)       |
| O3       | Yb1      | O1       | K5       | -71.1 (4)      | C15      | Yb1      | N5       | C35      | -91.4 (4)      |
| O3       | Yb1      | O6       | C36      | -89.3 (3)      | C15      | Yb1      | C36      | O6       | 71.7 (3)       |
| O3       | Yb1      | O4       | S2       | 78.73 (16)     | C15      | Yb1      | C36      | N6       | -102.3 (2)     |
| O3       | Yb1      | N1       | S1       | 174.23 (14)    | C15      | Yb1      | C36      | C37      | 91.2 (7)       |
| O3       | Yb1      | N1       | C8       | -2.5 (5)       | C15      | C16      | C21      | C20      | 176.0 (4)      |
| O3       | Yb1      | N4       | S2       | -100.08 (16)   | C15      | C16      | C17      | C18      | -176.9 (4)     |
| O3       | Yb1      | N4       | C29      | 79.5 (4)       | C35      | C34      | C29      | N4       | 0.3 (6)        |
| O3       | Yb1      | N2       | N3       | -7.2 (2)       | C35      | C34      | C29      | C30      | 178.2 (4)      |
| O3       | Yb1      | N2       | C14      | 178.0 (4)      | C35      | C34      | C33      | C32      | -177.2 (4)     |
| O3       | Yb1      | N5       | N6       | 102.4 (3)      | C29      | C34      | C35      | N5       | -3.9 (7)       |
| O3       | Yb1      | N5       | C35      | -77.5 (4)      | C29      | C34      | C33      | C32      | 2.1 (7)        |
| O3       | Yb1      | C15      | N3       | 175.1 (5)      | C29      | C30      | C31      | C32      | 2.1 (7)        |
| O3       | Yb1      | C15      | C16      | -12.0 (6)      | C36      | Yb1      | S1       | O1       | -71.36 (18)    |
| O3       | Yb1      | C36      | O6       | 92.8 (3)       | C36      | Yb1      | S1       | O2       | -160.07 (19)   |
| O3       | Yb1      | C36      | N6       | -81.2 (2)      | C36      | Yb1      | S1       | N1       | 103.48 (18)    |
| O3       | Yb1      | C36      | C37      | 112.3 (7)      | C36      | Yb1      | S1       | C1       | 14.28 (18)     |

| A  | B   | C   | D   | Angle/°     | A   | B   | C   | D   | Angle/°     |
|----|-----|-----|-----|-------------|-----|-----|-----|-----|-------------|
| O3 | C15 | C16 | C21 | 175.6(4)    | C36 | Yb1 | S1  | K5  | -121.54(8)  |
| O3 | C15 | C16 | C17 | -6.3(6)     | C36 | Yb1 | S2  | O4  | 162.1(2)    |
| O2 | S1  | O1  | Yb1 | 123.34(16)  | C36 | Yb1 | S2  | O5  | 72.9(2)     |
| O2 | S1  | O1  | K5  | 3.61(18)    | C36 | Yb1 | S2  | N4  | -19.4(2)    |
| O2 | S1  | N1  | Yb1 | -120.47(17) | C36 | Yb1 | S2  | C22 | -111.8(2)   |
| O2 | S1  | N1  | C8  | 57.0(4)     | C36 | Yb1 | S2  | K5  | 67.95(15)   |
| O2 | S1  | C1  | C2  | -172.7(3)   | C36 | Yb1 | O1  | S1  | 106.82(17)  |
| O2 | S1  | C1  | C7  | 9.5(4)      | C36 | Yb1 | O1  | K5  | -153.33(13) |
| O2 | S1  | K5  | S2  | 119.28(16)  | C36 | Yb1 | O3  | C15 | -93.4(3)    |
| O2 | S1  | K5  | O1  | -175.8(2)   | C36 | Yb1 | O4  | S2  | -78.9(7)    |
| O2 | S1  | K5  | O5  | 109.42(17)  | C36 | Yb1 | N1  | S1  | -78.60(16)  |
| O2 | S1  | K5  | O1S | 31.70(18)   | C36 | Yb1 | N1  | C8  | 104.7(4)    |
| O2 | S1  | K5  | O3S | -54.02(19)  | C36 | Yb1 | N4  | S2  | 168.60(13)  |
| O2 | S1  | K5  | O2S | -148.14(19) | C36 | Yb1 | N4  | C29 | -11.8(4)    |
| O4 | Yb1 | S1  | O1  | 103.79(17)  | C36 | Yb1 | N2  | N3  | 83.8(3)     |
| O4 | Yb1 | S1  | O2  | 15.08(18)   | C36 | Yb1 | N2  | C14 | -91.0(4)    |
| O4 | Yb1 | S1  | N1  | -81.36(18)  | C36 | Yb1 | N5  | N6  | 1.5(2)      |
| O4 | Yb1 | S1  | C1  | -170.57(18) | C36 | Yb1 | N5  | C35 | -178.4(4)   |
| O4 | Yb1 | S1  | K5  | 53.61(7)    | C36 | Yb1 | C15 | O3  | 88.8(3)     |
| O4 | Yb1 | S2  | O5  | -89.2(2)    | C36 | Yb1 | C15 | N3  | -96.1(3)    |
| O4 | Yb1 | S2  | N4  | 178.5(2)    | C36 | Yb1 | C15 | C16 | 76.7(7)     |
| O4 | Yb1 | S2  | C22 | 86.1(2)     | C36 | N6  | N5  | Yb1 | -2.7(4)     |
| O4 | Yb1 | S2  | K5  | -94.12(16)  | C36 | N6  | N5  | C35 | 177.2(3)    |
| O4 | Yb1 | O1  | S1  | -73.85(16)  | C37 | C38 | C39 | C40 | -0.8(8)     |
| O4 | Yb1 | O1  | K5  | 26.01(12)   | C37 | C42 | C41 | C40 | -0.9(8)     |
| O4 | Yb1 | O6  | C36 | 153.4(3)    | C12 | C11 | C10 | C9  | -0.1(7)     |
| O4 | Yb1 | O3  | C15 | 90.2(3)     | C12 | C13 | C14 | N2  | -173.3(4)   |
| O4 | Yb1 | N1  | S1  | 93.06(16)   | C14 | N2  | N3  | C15 | -177.0(4)   |
| O4 | Yb1 | N1  | C8  | -83.7(4)    | C14 | C13 | C12 | C11 | 179.4(4)    |
| O4 | Yb1 | N4  | S2  | -0.83(13)   | C24 | C25 | C27 | C28 | -1.5(7)     |
| O4 | Yb1 | N4  | C29 | 178.8(4)    | C21 | C16 | C17 | C18 | 1.3(7)      |
| O4 | Yb1 | N2  | N3  | -102.9(3)   | C25 | C24 | C23 | C22 | 1.2(6)      |
| O4 | Yb1 | N2  | C14 | 82.3(4)     | C31 | C32 | C33 | C34 | -1.2(8)     |
| O4 | Yb1 | N5  | N6  | -166.4(2)   | C7  | C1  | C2  | C3  | 0.5(6)      |
| O4 | Yb1 | N5  | C35 | 13.8(4)     | C23 | C22 | C28 | C27 | -0.1(6)     |
| O4 | Yb1 | C15 | O3  | -91.0(3)    | C23 | C24 | C25 | C26 | 178.0(4)    |
| O4 | Yb1 | C15 | N3  | 84.1(3)     | C23 | C24 | C25 | C27 | 0.2(7)      |
| O4 | Yb1 | C15 | C16 | -103.0(7)   | C28 | C22 | C23 | C24 | -1.3(6)     |
| O4 | Yb1 | C36 | O6  | -109.5(6)   | C33 | C32 | C31 | C30 | -0.9(8)     |
| O4 | Yb1 | C36 | N6  | 76.5(7)     | C33 | C34 | C35 | N5  | 175.3(4)    |
| O4 | Yb1 | C36 | C37 | -90.1(9)    | C33 | C34 | C29 | N4  | -178.9(4)   |
| O4 | S2  | O5  | K5  | -64.4(2)    | C33 | C34 | C29 | C30 | -0.9(6)     |

| A  | B   | C   | D   | Angle/°      | A   | B   | C   | D   | Angle/°     |
|----|-----|-----|-----|--------------|-----|-----|-----|-----|-------------|
| O4 | S2  | N4  | Yb1 | 1.17 (18)    | C17 | C16 | C21 | C20 | -2.2 (7)    |
| O4 | S2  | N4  | C29 | -178.5 (3)   | C9  | C8  | C13 | C12 | 0.8 (6)     |
| O4 | S2  | C22 | C23 | 86.6 (4)     | C9  | C8  | C13 | C14 | -178.4 (4)  |
| O4 | S2  | C22 | C28 | -95.3 (4)    | C10 | C11 | C12 | C13 | -0.4 (7)    |
| O4 | S2  | K5  | S1  | -26.13 (12)  | C6  | C4  | C3  | C2  | -1.9 (7)    |
| O4 | S2  | K5  | O1  | -50.79 (14)  | C3  | C4  | C6  | C7  | 1.5 (7)     |
| O4 | S2  | K5  | O2  | -5.79 (14)   | C1S | O1S | K5  | S1  | 44.3 (3)    |
| O4 | S2  | K5  | O5  | 125.0 (2)    | C1S | O1S | K5  | S2  | -31.7 (3)   |
| O4 | S2  | K5  | O1S | 86.36 (14)   | C1S | O1S | K5  | O1  | 28.6 (4)    |
| O4 | S2  | K5  | O3S | 132.9 (3)    | C1S | O1S | K5  | O2  | 56.4 (3)    |
| O4 | S2  | K5  | O2S | -108.32 (14) | C1S | O1S | K5  | O5  | -44.8 (3)   |
| O5 | S2  | O4  | Yb1 | 124.39 (17)  | C1S | O1S | K5  | O3S | 160.6 (3)   |
| O5 | S2  | N4  | Yb1 | -123.77 (17) | C1S | O1S | K5  | O2S | -136.3 (5)  |
| O5 | S2  | N4  | C29 | 56.5 (4)     | C5S | O3S | K5  | S1  | -46.2 (4)   |
| O5 | S2  | C22 | C23 | -150.0 (3)   | C5S | O3S | K5  | S2  | 157.3 (3)   |
| O5 | S2  | C22 | C28 | 28.1 (4)     | C5S | O3S | K5  | O1  | -18.3 (5)   |
| O5 | S2  | K5  | S1  | -151.15 (19) | C5S | O3S | K5  | O2  | -65.6 (4)   |
| O5 | S2  | K5  | O1  | -175.8 (2)   | C5S | O3S | K5  | O5  | 161.9 (4)   |
| O5 | S2  | K5  | O2  | -130.8 (2)   | C5S | O3S | K5  | O1S | -154.2 (4)  |
| O5 | S2  | K5  | O1S | -38.7 (2)    | C5S | O3S | K5  | O2S | 39.4 (4)    |
| O5 | S2  | K5  | O3S | 7.9 (4)      | C3S | O2S | K5  | S1  | 178.5 (4)   |
| O5 | S2  | K5  | O2S | 126.7 (2)    | C3S | O2S | K5  | S2  | -105.9 (4)  |
| N6 | N5  | C35 | C34 | 179.5 (4)    | C3S | O2S | K5  | O1  | -168.5 (5)  |
| N6 | C36 | C37 | C38 | 177.9 (4)    | C3S | O2S | K5  | O2  | 166.0 (4)   |
| N6 | C36 | C37 | C42 | -2.7 (6)     | C3S | O2S | K5  | O5  | -89.0 (4)   |
| N1 | Yb1 | S1  | O1  | -174.8 (2)   | C3S | O2S | K5  | O1S | -1.0 (8)    |
| N1 | Yb1 | S1  | O2  | 96.4 (2)     | C3S | O2S | K5  | O3S | 59.6 (4)    |
| N1 | Yb1 | S1  | C1  | -89.2 (2)    | K5  | S1  | O1  | Yb1 | 119.74 (14) |
| N1 | Yb1 | S1  | K5  | 134.97 (17)  | K5  | S1  | N1  | Yb1 | -59.61 (18) |
| N1 | Yb1 | S2  | O4  | 38.77 (17)   | K5  | S1  | N1  | C8  | 117.9 (3)   |
| N1 | Yb1 | S2  | O5  | -50.4 (2)    | K5  | S1  | C1  | C2  | 133.0 (3)   |
| N1 | Yb1 | S2  | N4  | -142.74 (18) | K5  | S1  | C1  | C7  | -44.7 (4)   |
| N1 | Yb1 | S2  | C22 | 124.86 (18)  | K5  | S2  | O4  | Yb1 | 86.76 (10)  |
| N1 | Yb1 | S2  | K5  | -55.35 (8)   | K5  | S2  | N4  | Yb1 | -91.05 (10) |
| N1 | Yb1 | O1  | S1  | 3.06 (14)    | K5  | S2  | N4  | C29 | 89.2 (3)    |
| N1 | Yb1 | O1  | K5  | 102.92 (15)  | K5  | S2  | C22 | C23 | -145.9 (3)  |
| N1 | Yb1 | O6  | C36 | 131.2 (3)    | K5  | S2  | C22 | C28 | 32.2 (5)    |
| N1 | Yb1 | O3  | C15 | 14.5 (4)     | K5  | O1S | C1S | C2S | -56.2 (5)   |
| N1 | Yb1 | O4  | S2  | -141.01 (17) | K5  | O3S | C5S | C6S | 3.2 (7)     |
| N1 | Yb1 | N4  | S2  | 45.7 (2)     | K5  | O2S | C3S | C4S | 24.8 (6)    |
| N1 | Yb1 | N4  | C29 | -134.7 (4)   |     |     |     |     |             |

**Table 7 Hydrogen Atom Coordinates ( $\text{\AA}\times 10^4$ ) and Isotropic Displacement Parameters ( $\text{\AA}^2\times 10^3$ ) for  $\text{K}(\text{EtOH})_3[\text{Yb}(\text{L})_2]$  (CCDC 2016985).**

| Atom | x         | y         | z         | U(eq) |
|------|-----------|-----------|-----------|-------|
| H19  | 14257     | -4939     | 414       | 29    |
| H40  | 8279      | -4288     | 4830      | 36    |
| H20  | 15930     | -4425     | 1012      | 27    |
| H26A | 13411     | 1734      | -674      | 52    |
| H26B | 12103     | 2875      | -917      | 52    |
| H26C | 11955     | 1471      | -932      | 52    |
| H5A  | 7782      | 1015      | 5820      | 54    |
| H5B  | 6965      | 92        | 5549      | 54    |
| H5C  | 6072      | 1518      | 5631      | 54    |
| H32  | 3958      | 1163      | 459       | 34    |
| H38  | 10519     | -2263     | 3894      | 27    |
| H11  | 15394     | 1700      | 4111      | 29    |
| H18  | 11739     | -3782     | 404       | 29    |
| H39  | 10388     | -3549     | 4662      | 37    |
| H42  | 6450      | -2529     | 3425      | 27    |
| H41  | 6309      | -3773     | 4206      | 34    |
| H2   | 9214      | 109       | 3883      | 24    |
| H35  | 5865      | -605      | 2042      | 18    |
| H12  | 15452     | 290       | 3448      | 23    |
| H14  | 14433     | -672      | 2844      | 18    |
| H24  | 11459     | 363       | -63       | 27    |
| H21  | 15083     | -2849     | 1612      | 21    |
| H30  | 7334      | 2777      | 673       | 23    |
| H31  | 5389      | 2510      | 149       | 30    |
| H7   | 7567      | 3784      | 4186      | 24    |
| H23  | 10368     | 533       | 806       | 23    |
| H28  | 10304     | 4216      | 748       | 22    |
| H33  | 4522      | 41        | 1288      | 27    |
| H27  | 11477     | 4002      | -102      | 26    |
| H17  | 10875     | -2232     | 1023      | 23    |
| H9   | 10919     | 3089      | 3892      | 23    |
| H10  | 13114     | 3097      | 4334      | 27    |
| H6   | 6836      | 3209      | 5056      | 28    |
| H3   | 8496      | -445      | 4759      | 28    |
| H1S  | 7470 (30) | 7250 (20) | 2333 (14) | 37    |
| H1SA | 9427      | 7304      | 1950      | 34    |
| H1SB | 9502      | 6023      | 1666      | 34    |
| H2SA | 11340     | 5722      | 2349      | 54    |
| H2SB | 10198     | 4885      | 2493      | 54    |

| <b>Atom</b> | <b>x</b>  | <b>y</b>  | <b>z</b>  | <b>U(eq)</b> |
|-------------|-----------|-----------|-----------|--------------|
| H2SC        | 10048     | 6156      | 2795      | 54           |
| H3S         | 4410 (40) | 7247 (16) | 2619 (14) | 41           |
| H6SA        | 3442      | 4810      | 3252      | 67           |
| H6SB        | 2965      | 5475      | 3815      | 67           |
| H6SC        | 4696      | 5051      | 3641      | 67           |
| H5SA        | 2502      | 6961      | 3070      | 37           |
| H5SB        | 3687      | 7236      | 3482      | 37           |
| H2S         | 5180 (40) | 2430 (40) | 2727 (15) | 56           |
| H3SA        | 2737      | 3214      | 2506      | 30           |
| H3SB        | 3592      | 2037      | 2163      | 30           |
| H4SA        | 4101      | 3386      | 1460      | 44           |
| H4SB        | 3359      | 4578      | 1806      | 44           |
| H4SC        | 2333      | 3764      | 1576      | 44           |

## Refinement model description

Number of restraints - 9, number of constraints - unknown.

### Details:

#### 1. Fixed Uiso

At 1.2 times of:

All C(H) groups, All C(H,H) groups

At 1.5 times of:

All C(H,H,H) groups, All O(H) groups

#### 2. Restrained distances

O3S-H3S

0.85 with sigma of 0.01

O1S-H1S

0.85 with sigma of 0.01

O2S-H2S

0.85 with sigma of 0.01

C5S-H3S

1.873851 with sigma of 0.02

K5-H3S

3.175585 with sigma of 0.02

C1S-H1S

1.88629 with sigma of 0.02

K5-H1S

3.286641 with sigma of 0.02

C3S-H2S

1.895492 with sigma of 0.02

K5-H2S

3.125781 with sigma of 0.02

#### 3.a Secondary CH2 refined with riding coordinates:

C1S(H1SA,H1SB), C5S(H5SA,H5SB), C3S(H3SA,H3SB)

#### 3.b Aromatic/amide H refined with riding coordinates:

C19(H19), C40(H40), C20(H20), C32(H32), C38(H38), C11(H11), C18(H18),

C39(H39), C42(H42), C41(H41), C2(H2), C35(H35), C12(H12), C14(H14), C24(H24),

C21 (H21), C30 (H30), C31 (H31), C7 (H7), C23 (H23), C28 (H28), C33 (H33), C27 (H27),  
C17 (H17), C9 (H9), C10 (H10), C6 (H6), C3 (H3)

3.c Idealised Me refined as rotating group:

C26 (H26A,H26B,H26C), C5 (H5A,H5B,H5C), C2S (H2SA,H2SB,H2SC), C6S (H6SA,H6SB,  
H6SC), C4S (H4SA,H4SB,H4SC)

This report has been created with Olex2, compiled on 2020.02.04 svn.rd84adfe8 for OlexSys.

# Nuclear magnetic resonance data

## Experimental details

$^1\text{H}$  and  $^{13}\text{C}$  NMR spectra, as well as 2D spectra ( $^1\text{H}$ - $^1\text{H}$  COSY,  $^1\text{H}$ - $^{13}\text{C}$  HSQC,  $^1\text{H}$ - $^{13}\text{C}$  HMBC,  $^1\text{H}$ - $^1\text{H}$  NOESY, DOSY), were recorded from the  $\text{DMSO-}d_6$  solutions with a Bruker Avance 600 NMR spectrometer ( $^1\text{H}$  NMR frequency: 600.15 MHz). The measurements were done using the residual signals of the deuterated solvent ( $^1\text{H}$  2.50 ppm,  $^{13}\text{C}$  39.52 ppm). The following acquisition parameters were used:  $^1\text{H}$  (acquisition time 2.18 s. relaxation delay 3-4 s, number of scans 8-16),  $^{13}\text{C}$  (acquisition time 0.5 s. relaxation delay 1.5 s), NOESY (mixing time 0.3-0.6 s), DOSY (acquisition time 1 s. relaxation delay 3 s, number of scans 1, diffusion delay 0.2 s, diffusion gradient length 1.5 - 2.5 ms). Acquisition time and relaxation delay were reduced to 0.2 s for paramagnetic complexes due to fast nuclear relaxation.

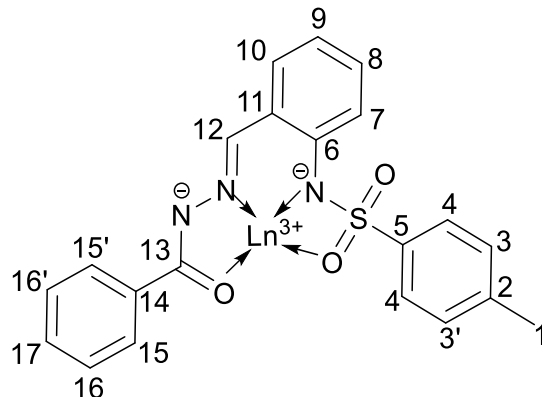

**Figure 15** Atom numbering in  $(\text{L})^{2-}$  anion



**Table 8 Assignments of  $^1\text{H}$  and  $^{13}\text{C}$  NMR signals of  $\text{H}_2\text{L}$ ,  $[\text{Lu}(\text{L})]^+$ ,  $[\text{Lu}(\text{L})_2]^-$ -A,  $[\text{Lu}(\text{L})_2]^-$ -B,  $[\text{Lu}(\text{L})_2]^-$ -C,  $[\text{Yb}(\text{L})]^+$  in  $\text{DMSO-d}_6$ . For  $[\text{Yb}(\text{L})]^+$  presented experimental values (exp.) as well as chemical shift calculated by formula (4) (see the main text).**

| №  | $\text{H}_2\text{L}$  |                          | $[\text{Lu}(\text{L})]^+$ |                          | $[\text{Lu}(\text{L})_2]^-$ -A |                          | $[\text{Lu}(\text{L})_2]^-$ -B |                          | $[\text{Lu}(\text{L})_2]^-$ -C |                          | $[\text{Yb}(\text{L})]^+$       |                                  |
|----|-----------------------|--------------------------|---------------------------|--------------------------|--------------------------------|--------------------------|--------------------------------|--------------------------|--------------------------------|--------------------------|---------------------------------|----------------------------------|
|    | $^1\text{H}$<br>(ppm) | $^{13}\text{C}$<br>(ppm) | $^1\text{H}$<br>(ppm)     | $^{13}\text{C}$<br>(ppm) | $^1\text{H}$<br>(ppm)          | $^{13}\text{C}$<br>(ppm) | $^1\text{H}$<br>(ppm)          | $^{13}\text{C}$<br>(ppm) | $^1\text{H}$<br>(ppm)          | $^{13}\text{C}$<br>(ppm) | $^1\text{H}$ ,<br>exp.<br>(ppm) | $^1\text{H}$ ,<br>calc.<br>(ppm) |
| 1  | 2.31                  | 20.93                    | 2.37                      | 20.89                    | 2.15                           | 20.88                    | 2.15                           | 20.88                    | 2.37                           | 20.93                    | 4.18                            | 3.56                             |
| 2  |                       | 143.57                   |                           | 143.09                   |                                | 142.04                   |                                | 142.14                   |                                | 142.36                   |                                 |                                  |
| 3  | 7.32                  | 129.64                   | 7.39                      | 129.60                   | 6.88                           | 129.11                   | 6.88                           | 129.11                   | 6.86                           | 129.34                   | 11.68                           | 11.49                            |
| 4  | 7.69                  | 126.97                   | 8.01                      | 127.83                   | 8.04                           | 128.09                   | 8.03                           | 128.09                   | 8.09j                          | 128.23                   | 23.68                           | 23.90                            |
| 5  |                       | 136.49                   |                           | 137.77                   |                                | 138.42                   |                                | 138.89                   |                                | 138.05                   |                                 |                                  |
| 6  |                       | 124.35                   |                           | 123.17                   |                                | 123.47                   |                                | 123.58                   |                                | 123.77                   |                                 |                                  |
| 7  | 7.32                  | 121.21                   | 6.92                      | 117.86                   | 6.98                           | 117.96                   | 6.98                           | 117.96                   | 6.95                           | 117.96                   | -14.05                          | -14.65                           |
| 8  | 7.32                  | 130.47                   | 7.14                      | 131.90                   | 7.10                           | 131.06                   | 7.10                           | 131.06                   | 7.04                           | 131.06                   | -0.62                           | -0.24                            |
| 9  | 7.18                  | 124.67                   | 6.86                      | 120.03                   | 6.82                           | 119.11                   | 6.82                           | 119.11                   | 6.79                           | 119.11                   | 1.32                            | 1.38                             |
| 10 | 7.60                  | 132.04                   | 7.53                      | 135.92                   | 7.47                           | 135.50                   | 7.47                           | 135.50                   | 7.47                           | 135.35                   | -2.21                           | -2.42                            |
| 11 |                       | 136.26                   |                           | 142.00                   |                                | 142.87                   |                                | 142.86                   |                                | 142.57                   |                                 |                                  |
| 12 | 8.57                  | 147.98                   | 8.58                      | 157.28                   | 8.52                           | 156.25                   | 8.52                           | 156.21                   | 8.54                           | 155.46                   | -15.55                          | -15.62                           |
| 13 |                       | 163.01                   |                           | 169.48                   |                                | 168.70                   |                                | 168.70                   |                                | 169.45                   |                                 |                                  |
| 14 |                       | 132.80                   |                           | 135.29                   |                                | 135.81                   |                                | 135.81                   |                                | 136.34                   |                                 |                                  |
| 15 | 7.99                  | 127.93                   | 8.11                      | 127.78                   | 8.03                           | 127.71                   | 8.03                           | 127.71                   | 7.93                           | 127.52                   | -18.36                          | -17.90                           |
| 16 | 7.58                  | 128.55                   | 7.43                      | 128.07                   | 7.39                           | 127.81                   | 7.39                           | 127.81                   | 7.33                           | 127.93                   | -1.13                           | -1.68                            |
| 17 | 7.55                  | 130.60                   | 7.47                      | 130.16                   | 7.40                           | 129.59                   | 7.40                           | 129.59                   | 7.40                           | 129.45                   | 1.26                            | 0.72                             |

## Spectra of H<sub>2</sub>L

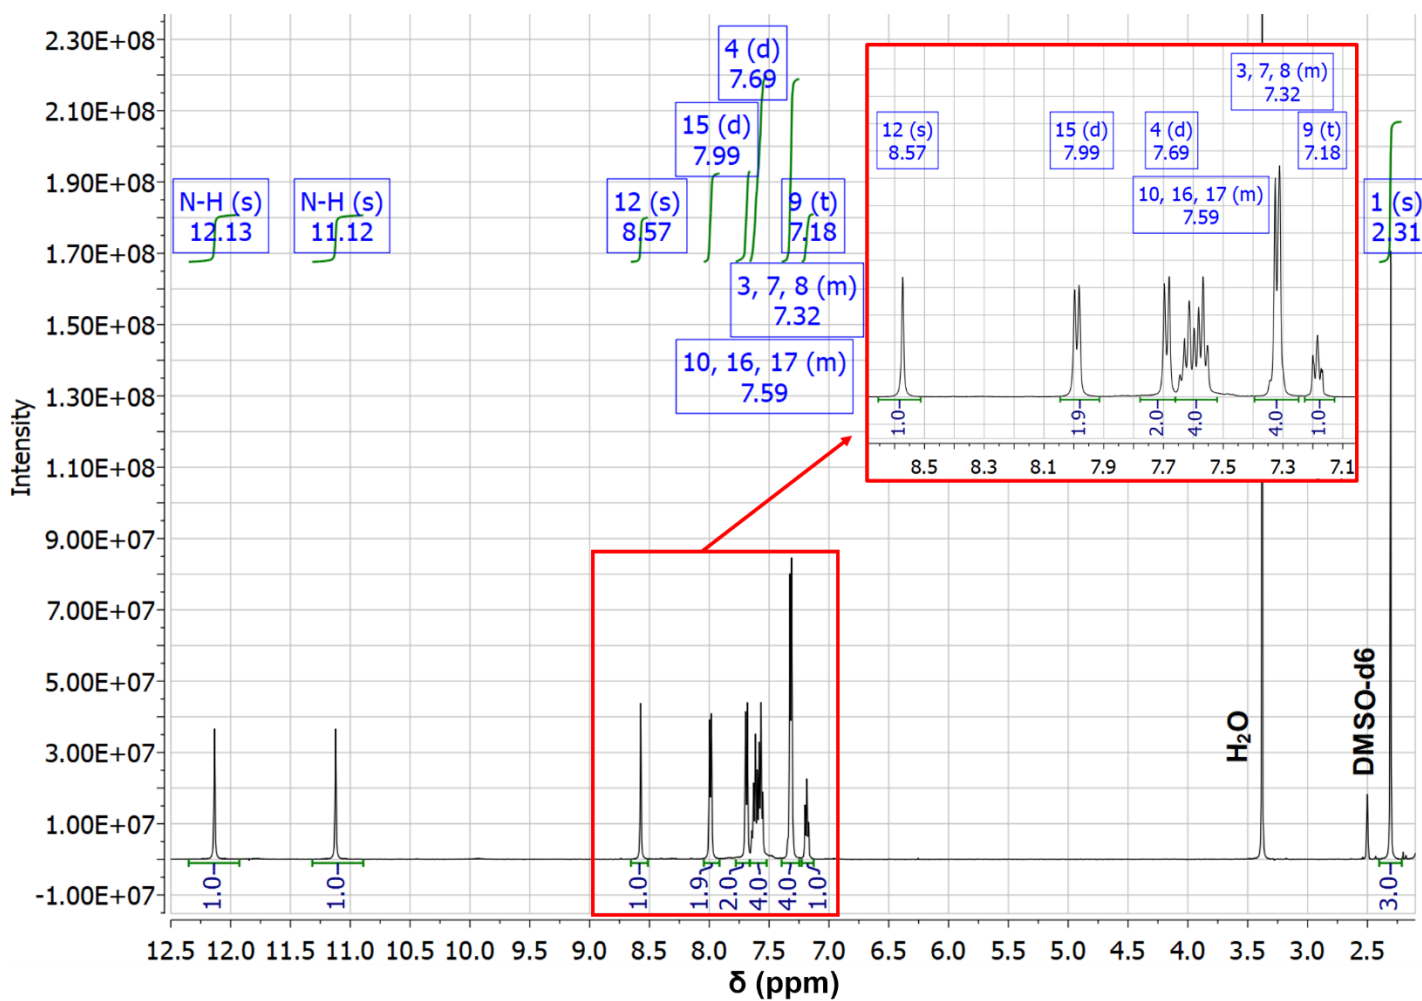

**Figure 16** <sup>1</sup>H NMR spectrum of 2-(tosylamino)-benzylidene-N-(benzoyl)-lhydrazone (H<sub>2</sub>L) in DMSO-d<sub>6</sub>

<sup>1</sup>H NMR in DMSO-d<sub>6</sub> (δ, ppm): 12.13 (s, 1H), 11.12 (s, 1H), 8.57 (s, 1H), 7.99 (d, J = 7.4 Hz, 2H), 7.69 (d, J = 7.9 Hz, 2H), 7.66 – 7.54 (m, 4H), 7.37 – 7.27 (m, 4H), 7.18 (t, J = 17.6 Hz, 1H), 2.31 (s, 3H).

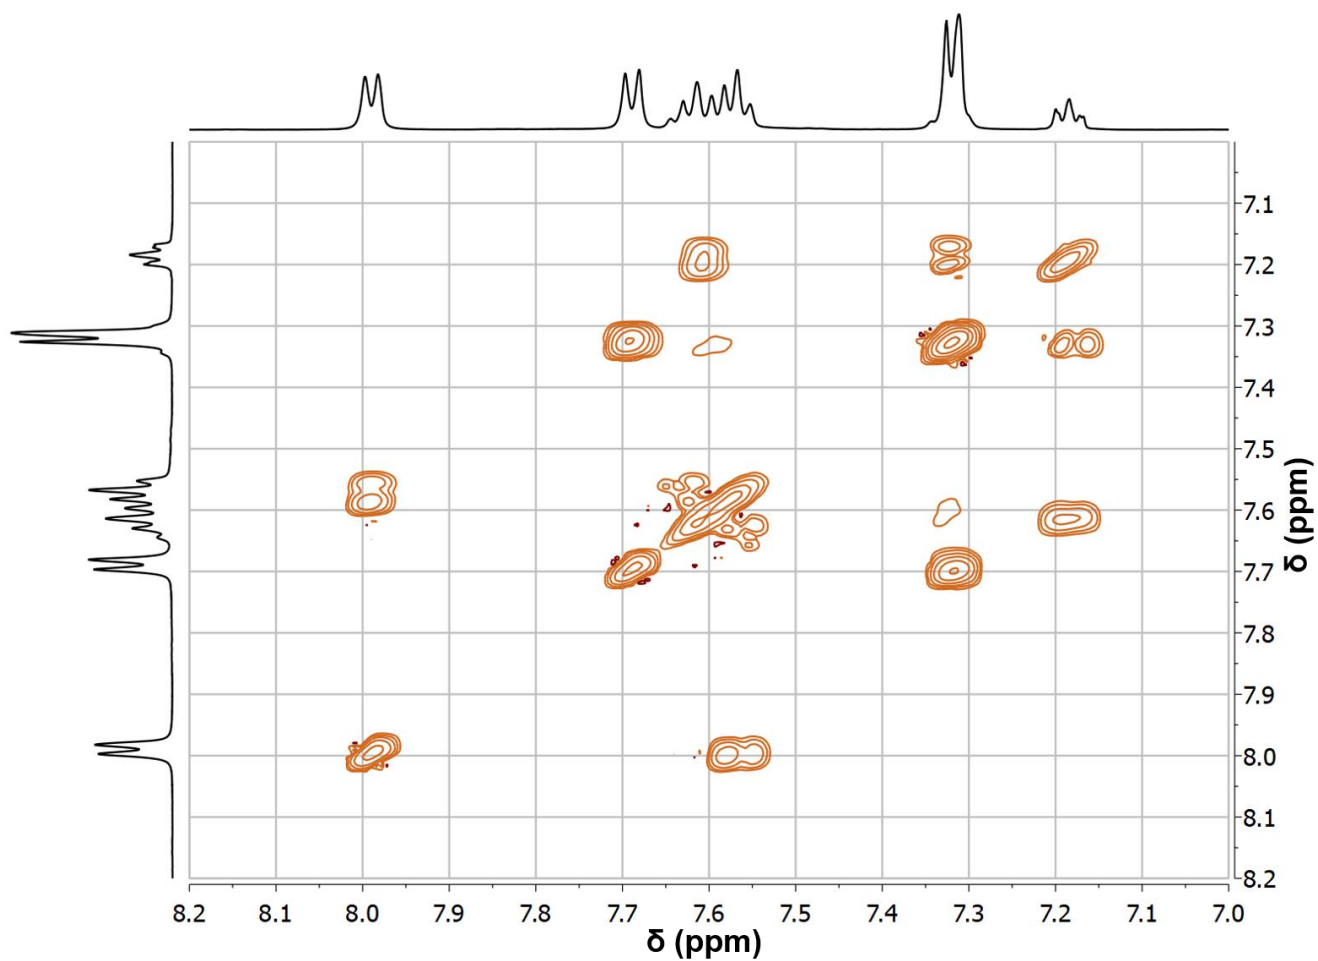

Figure 17 Fragment of  $^1\text{H}$  COSY spectrum of  $\text{H}_2\text{L}$  in  $\text{DMSO-d}_6$

## Spectra of Lu(HL)<sub>2</sub>Cl

In DMSO, Lu(HL)<sub>2</sub>Cl dissociate according to the reaction (see reaction (1) in the main text):

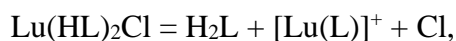

thus, in its NMR spectra, signals of both H<sub>2</sub>L and [Lu(L)]<sup>+</sup> are present.

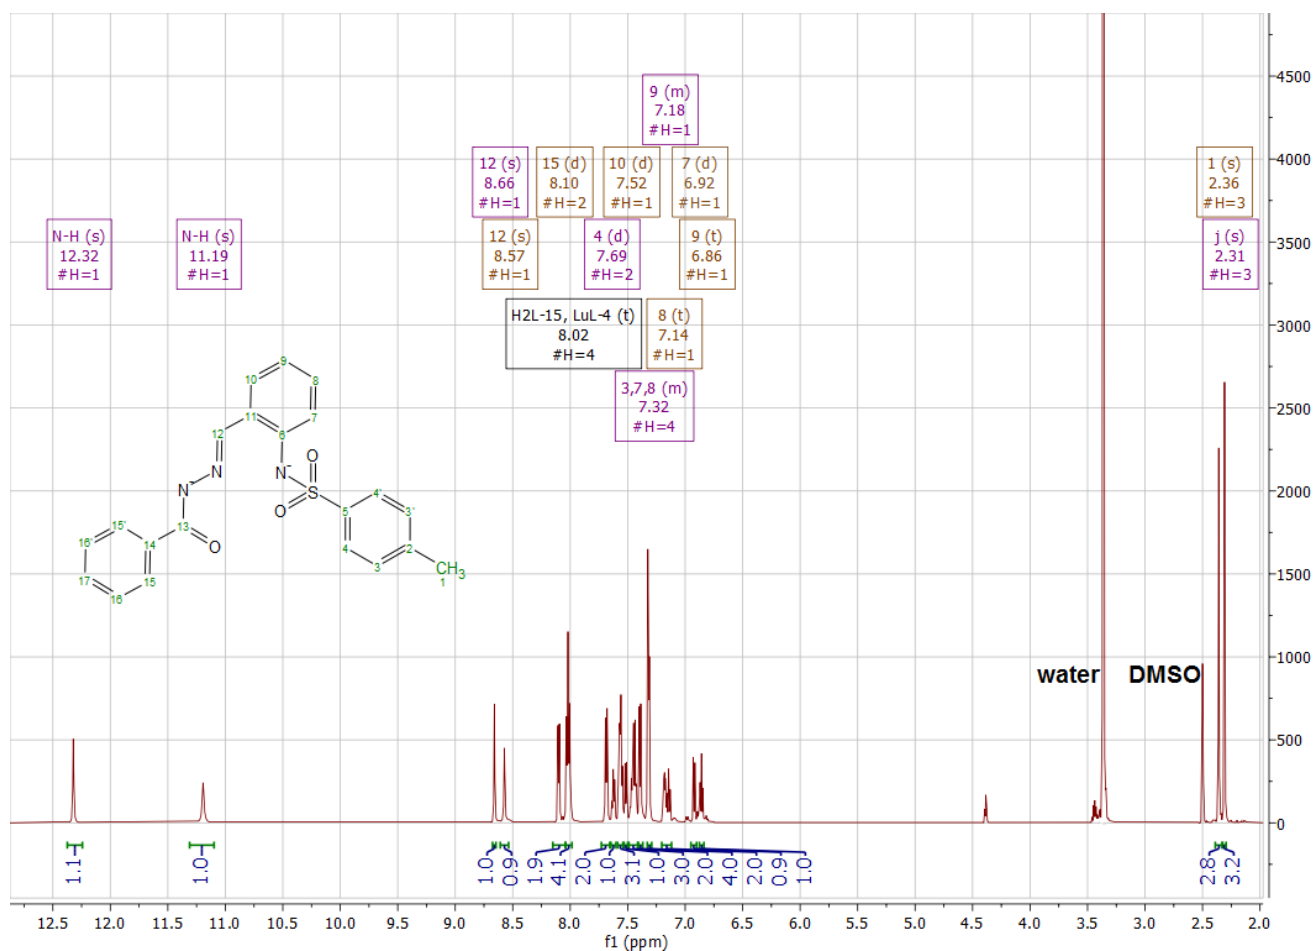

**Figure 18** <sup>1</sup>H NMR spectrum of Lu(HL)<sub>2</sub>Cl in DMSO-d<sub>6</sub>. Violet signals correspond to H<sub>2</sub>L, brown signals – to [Lu(L)]<sup>+</sup>, black signals are a mixture of both H<sub>2</sub>L and [Lu(L)]<sup>+</sup>.

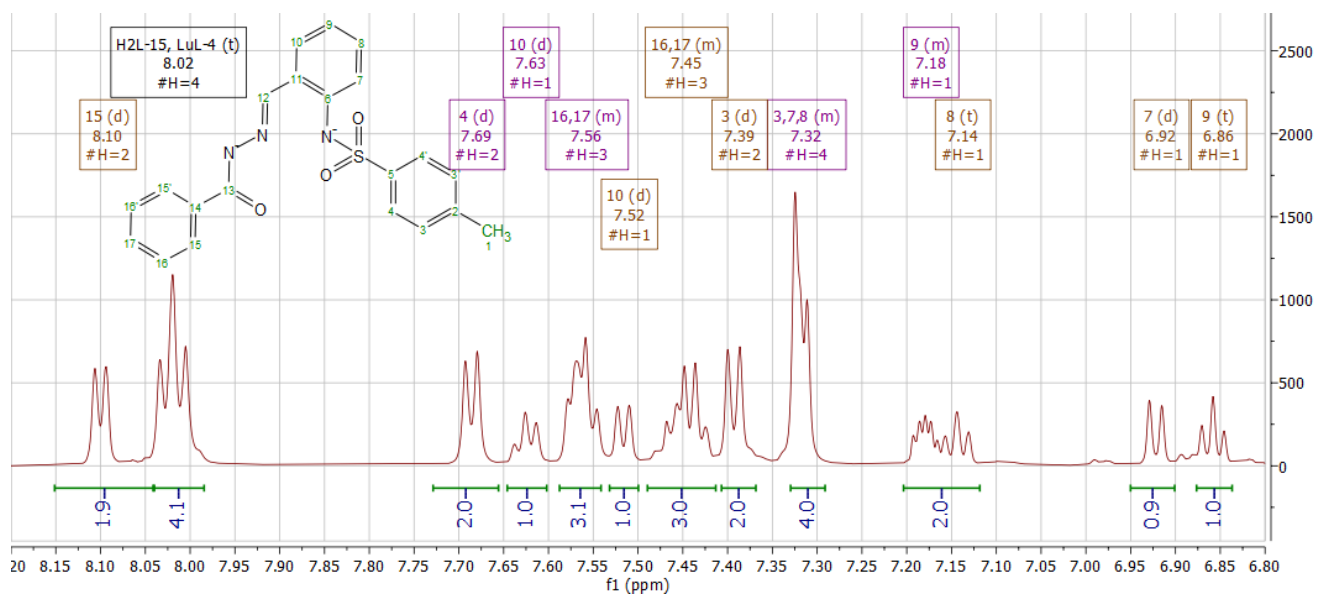

**Figure 19**  $^1\text{H}$  NMR spectrum of  $\text{Lu}(\text{HL})_2\text{Cl}$  in  $\text{DMSO-d}_6$  in the range 6.80 – 8.20 ppm. Violet signals correspond to  $\text{H}_2\text{L}$ , brown signals – to  $[\text{Lu}(\text{L})]^+$ , black signals are a mixture of both  $\text{H}_2\text{L}$  and  $[\text{Lu}(\text{L})]^+$ .

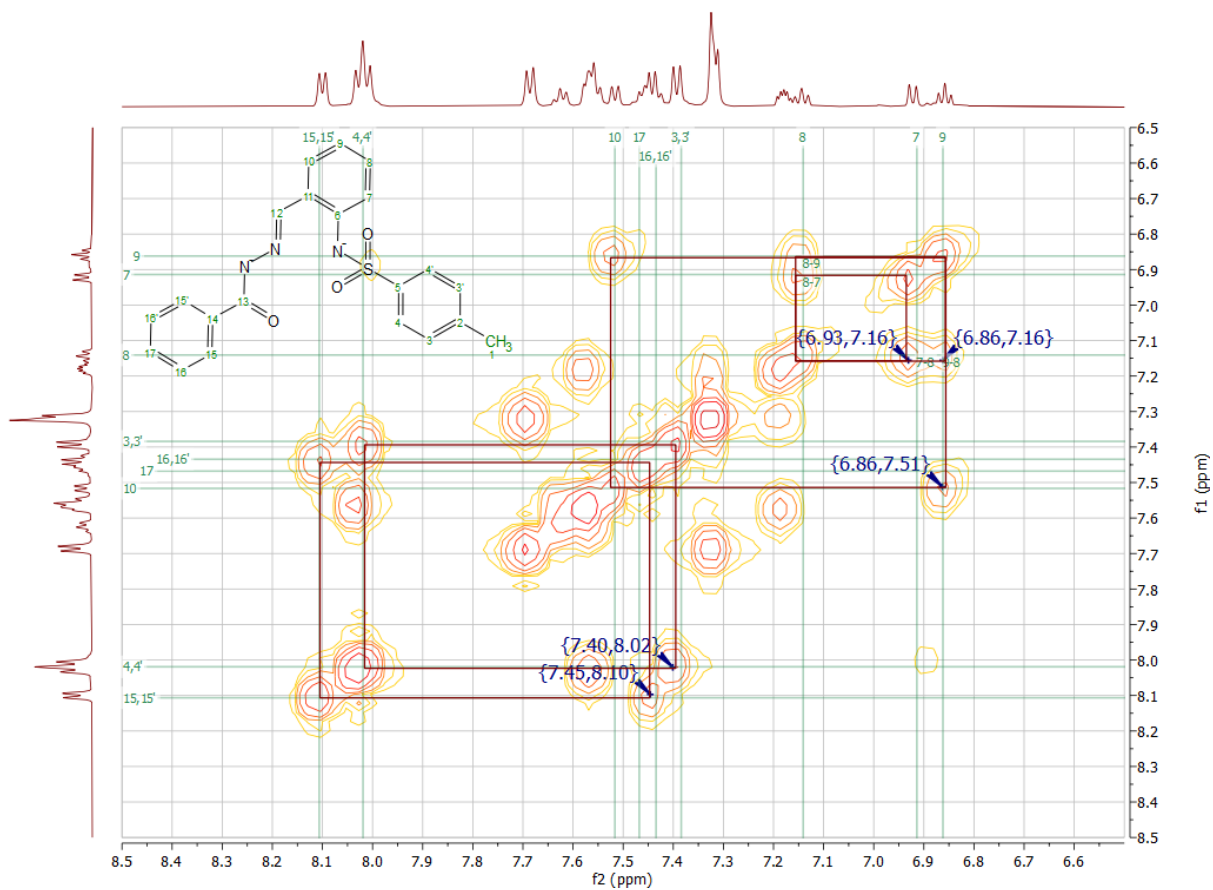

**Figure 20** Fragment of a COSY spectrum of  $\text{Lu}(\text{HL})_2\text{Cl}$  in  $\text{DMSO-d}_6$ . For clearance, only signals of  $[\text{Lu}(\text{L})]^+$  are highlighted.

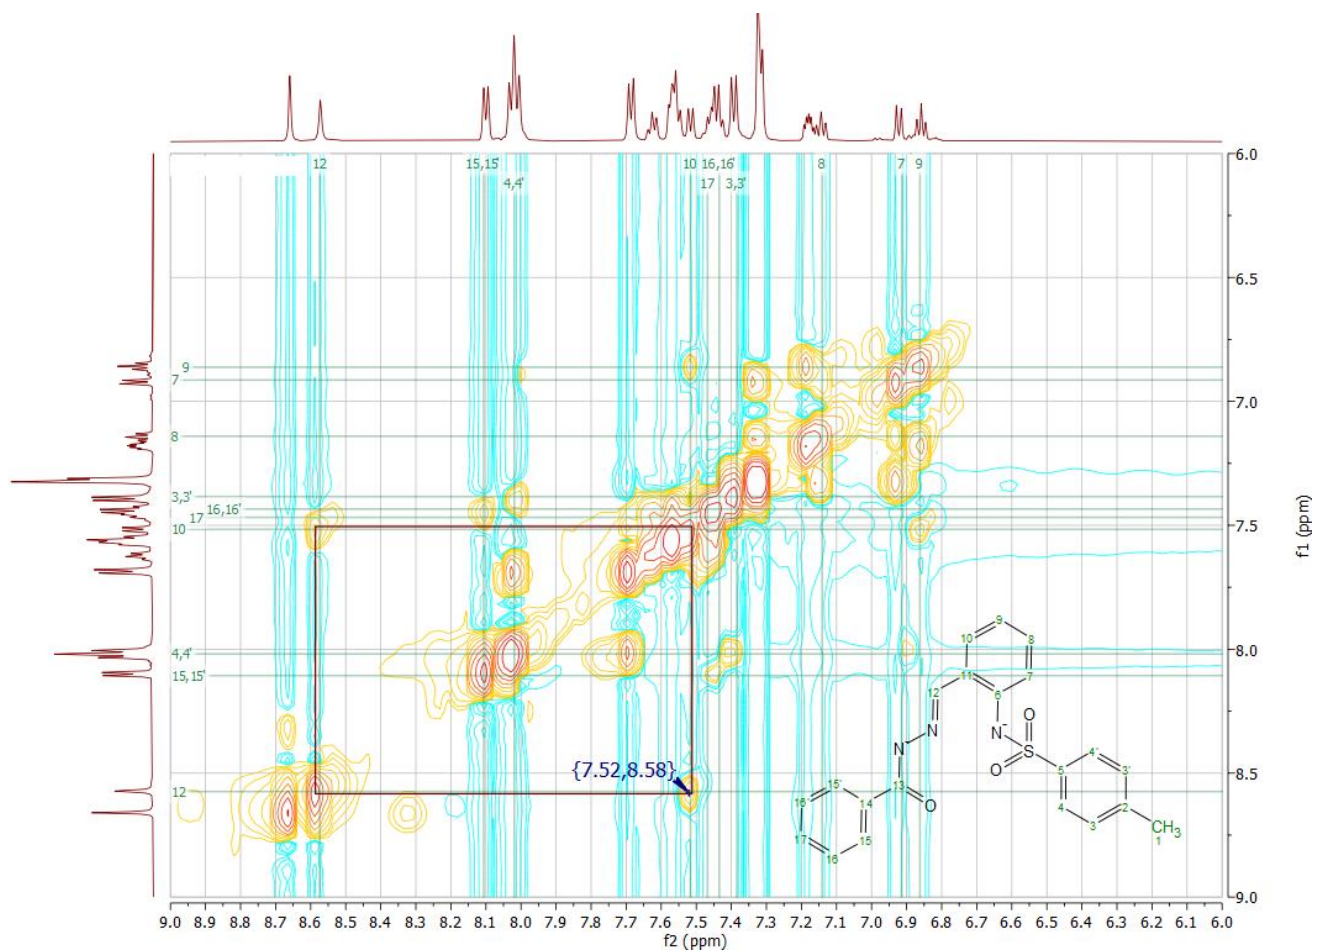

**Figure 21** Fragment of the NOESY spectrum of  $\text{Lu}(\text{HL})_2\text{Cl}$  in  $\text{DMSO-d}_6$ . For clearance, only signals of  $[\text{Lu}(\text{L})]^+$  which bring information additional to  $^1\text{H}$  and COSY spectra are highlighted.

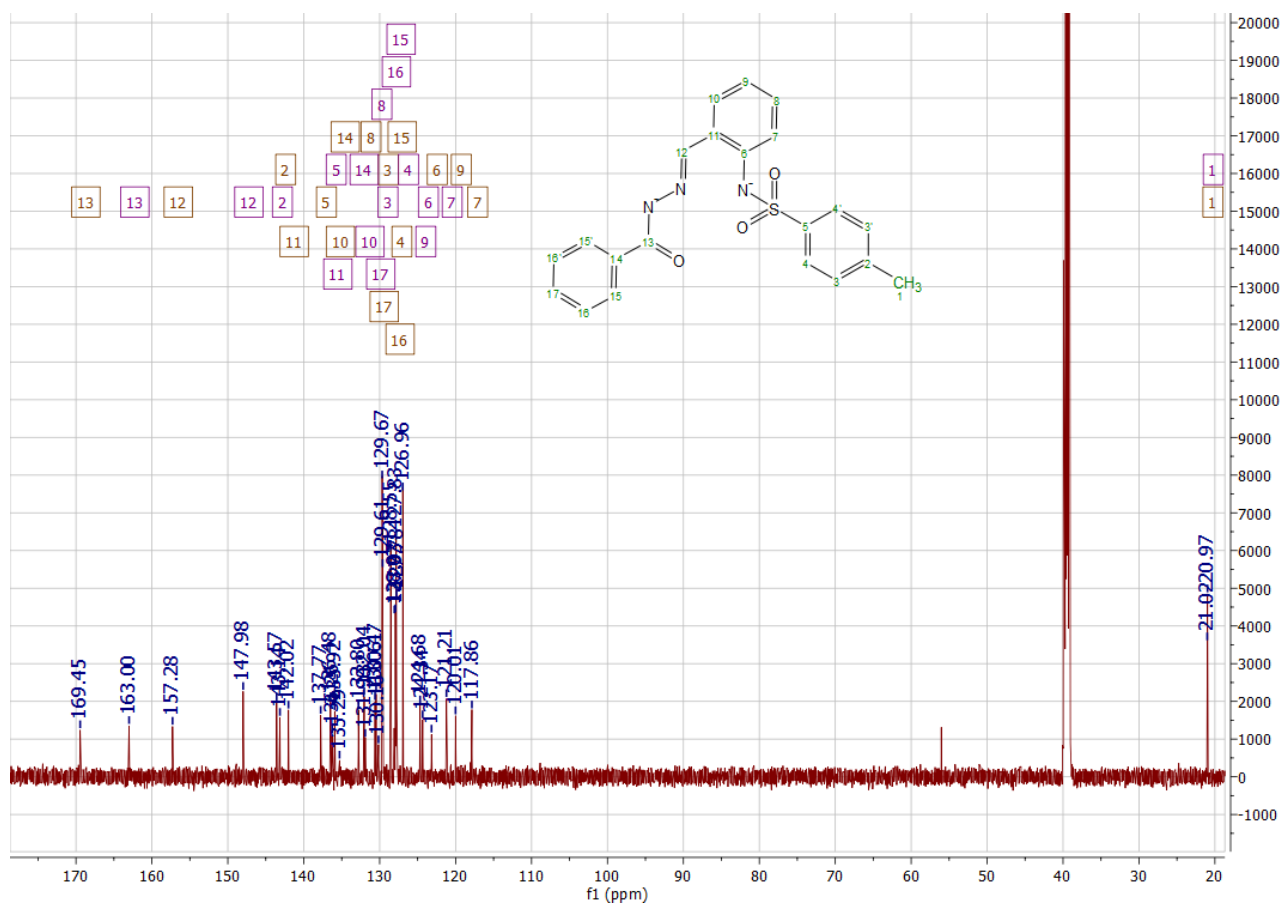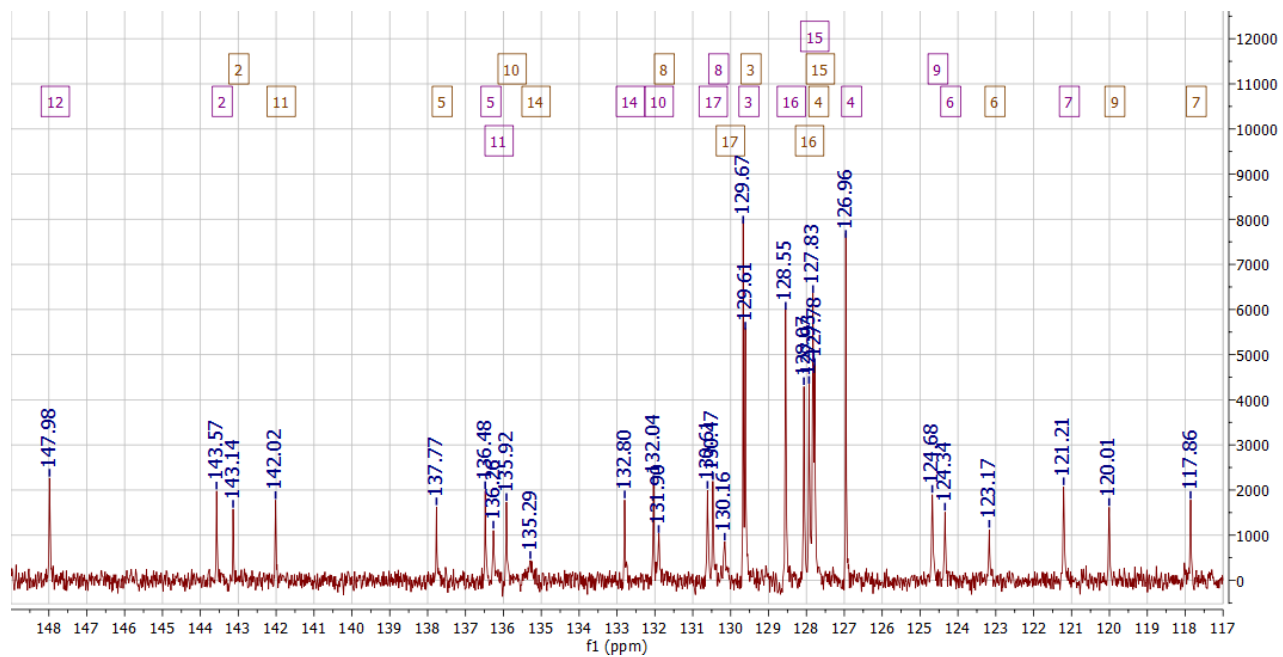

Figure 22 <sup>13</sup>C NMR spectrum of Lu(HL)<sub>2</sub>Cl in DMSO-d<sub>6</sub>. Violet signals correspond to H<sub>2</sub>L, brown signals – to [Lu(L)]<sup>+</sup>.



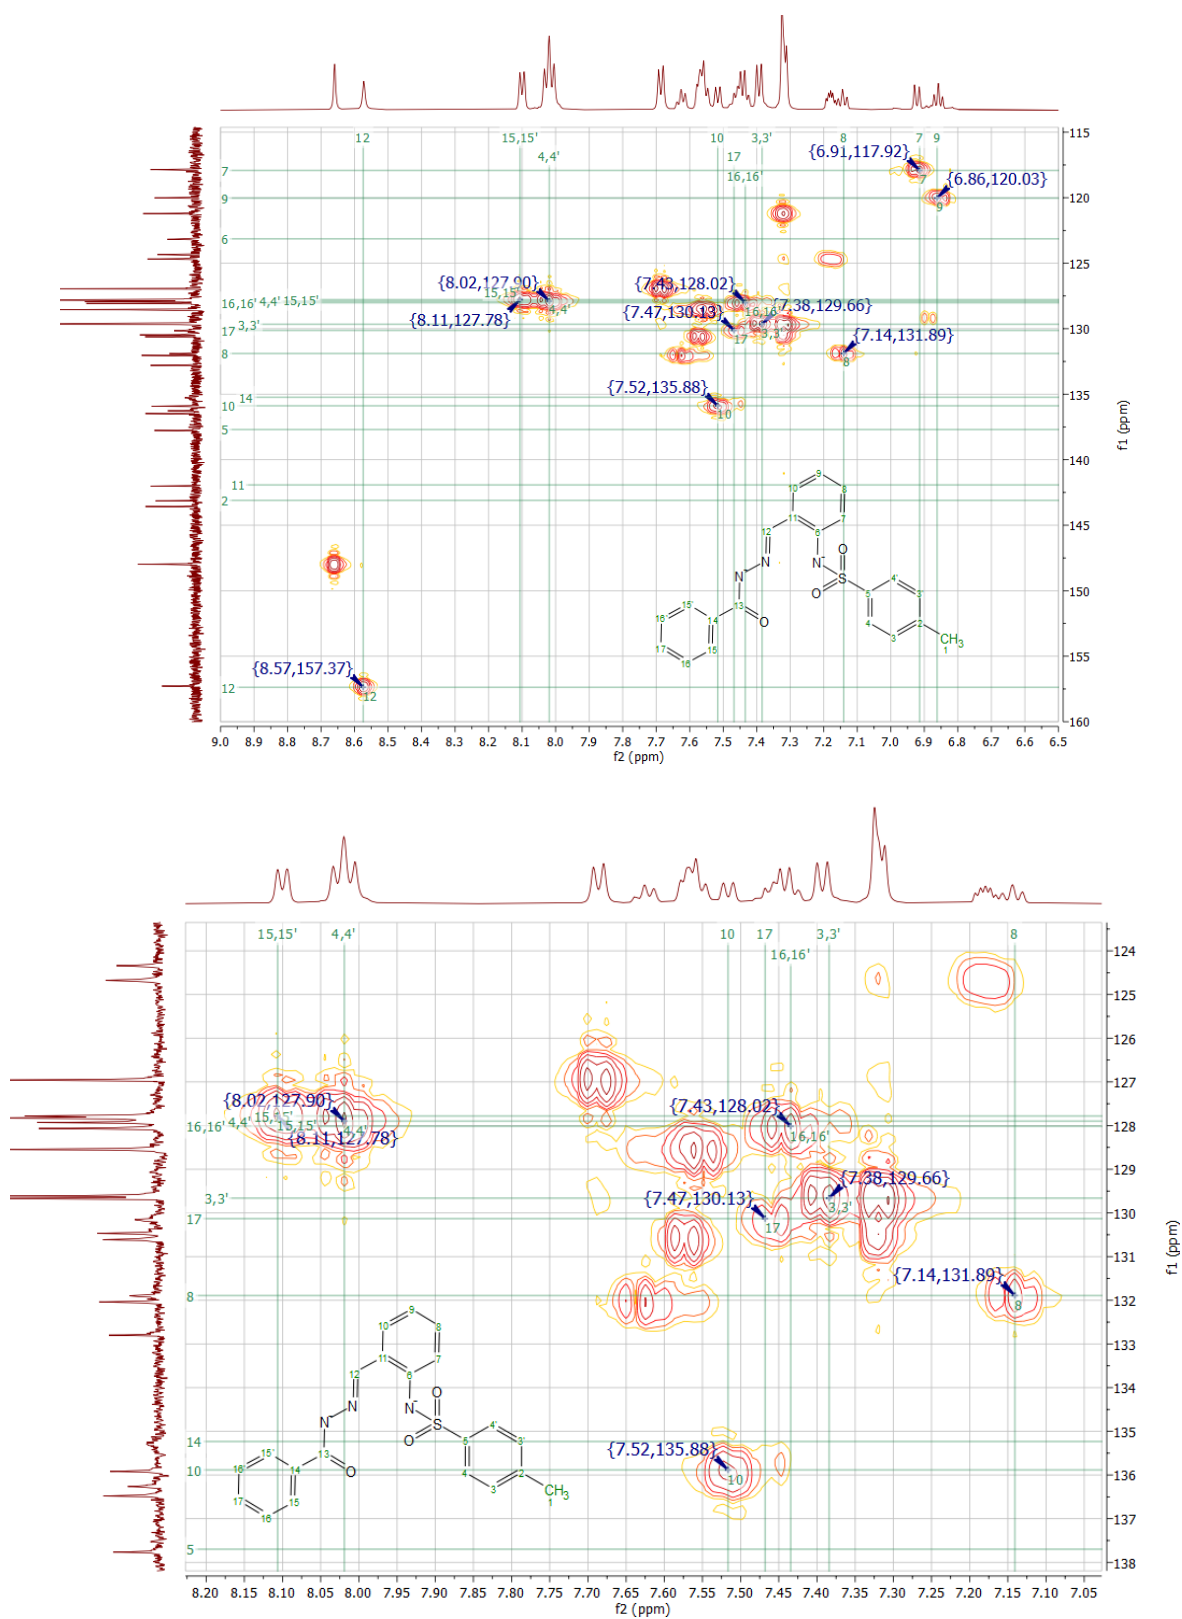

**Figure 23 HMQC spectrum of Lu(HL)<sub>2</sub>Cl in DMSO-d<sub>6</sub>. For clearance, only signals of [Lu(L)]<sup>+</sup> are highlighted.**

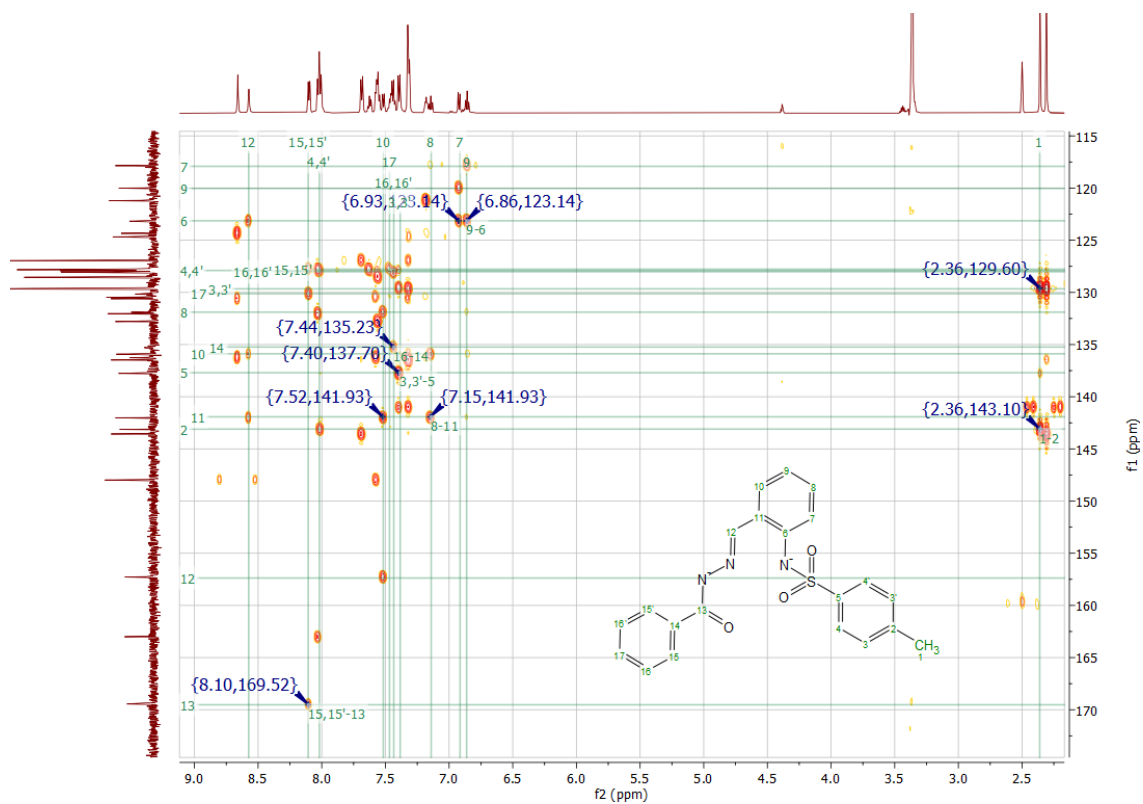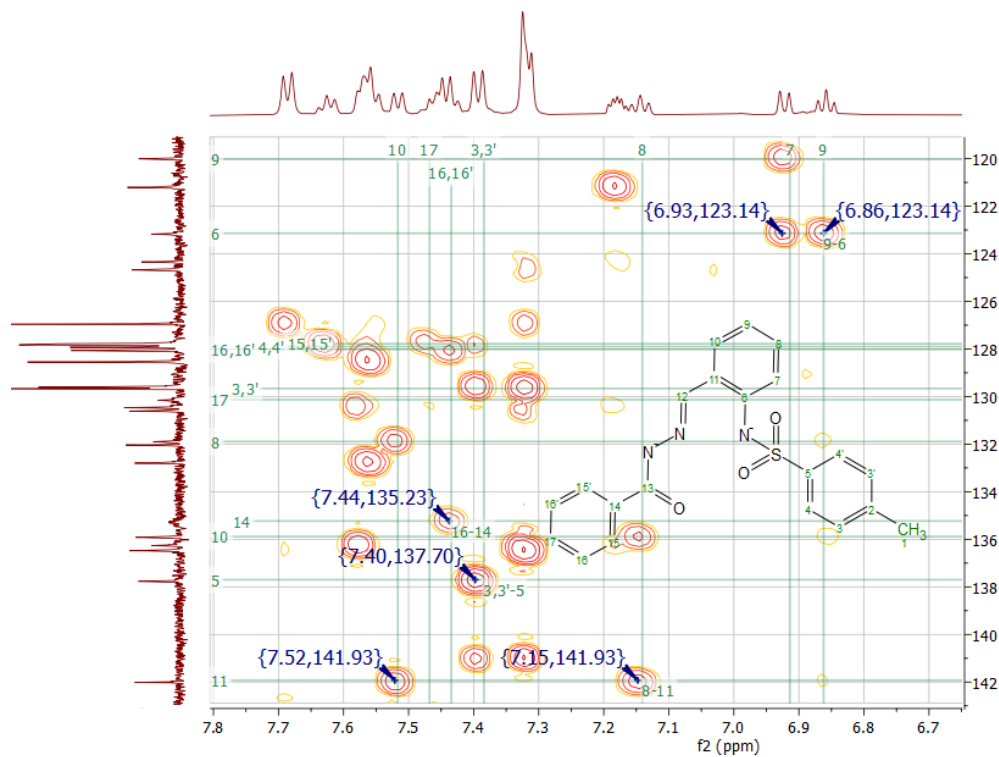

Figure 24 HMBC spectrum of  $\text{Lu}(\text{HL})_2\text{Cl}$  in  $\text{DMSO-d}_6$ . For clearance, only signals of  $[\text{Lu}(\text{L})]^+$  which brings additional to HMQC spectrum information, are highlighted.

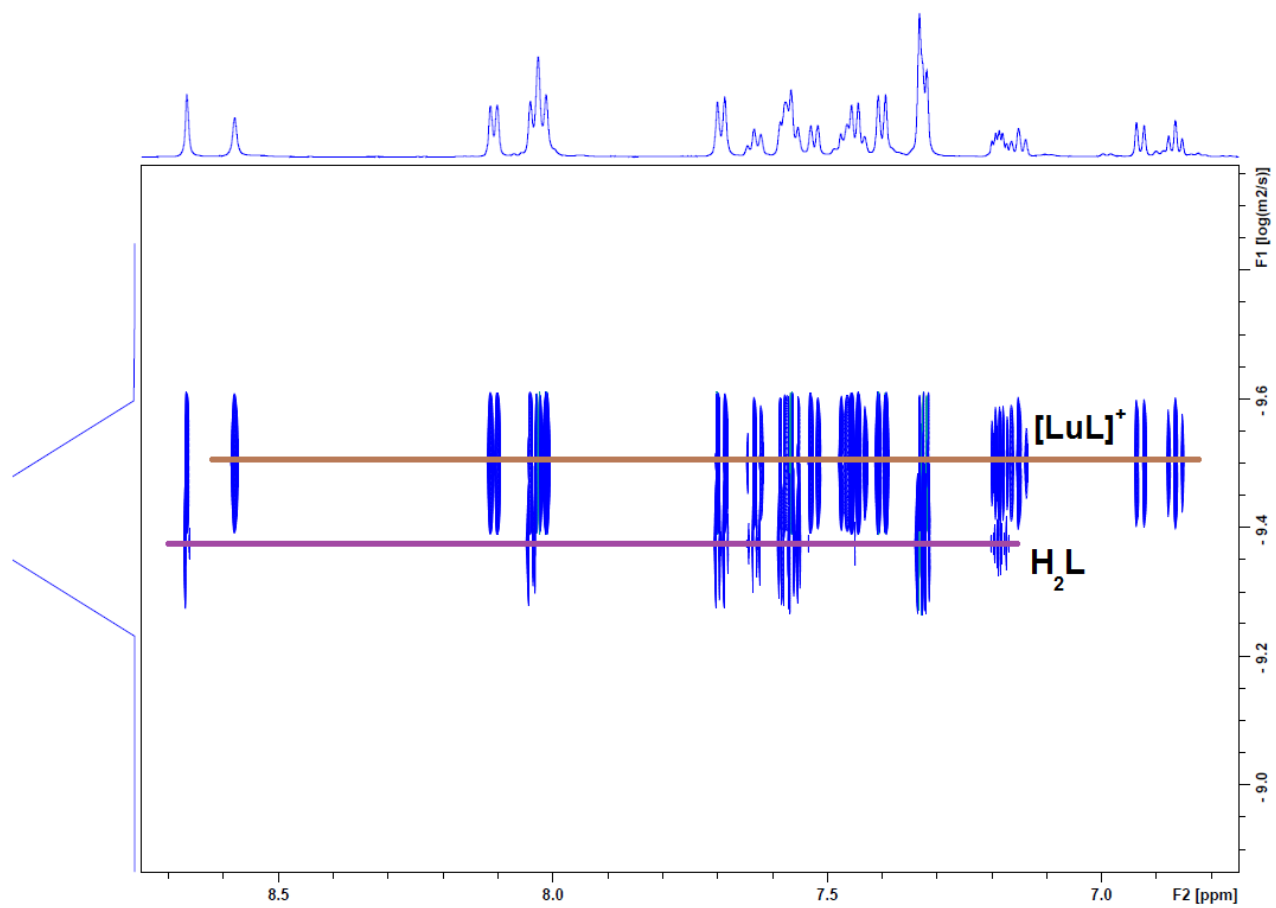

**Figure 25 DOSY spectrum of Lu(HL)<sub>2</sub>Cl in DMSO-d<sub>6</sub>. Violet signals correspond to H<sub>2</sub>L, brown signals – to [Lu(L)]<sup>+</sup>.**

## Spectra of $\text{K}(\text{H}_2\text{O})_3[\text{Lu}(\text{L})_2]$

Spectra of  $\text{K}(\text{H}_2\text{O})_3[\text{Lu}(\text{L})_2]$  correspond to the spectra of the anionic complex  $[\text{Lu}(\text{L})_2]^-$ . Signals of  $\text{H}_2\text{L}$  or  $[\text{Lu}(\text{L})]^+$  are not observed in spectra of  $\text{K}(\text{H}_2\text{O})_3[\text{Lu}(\text{L})_2]$ .

At least 3 different forms (A, B and C, see Table 8) of the ligand anion  $\{\text{L}^-\}$  appear in the spectra of  $\text{K}(\text{H}_2\text{O})_3[\text{Lu}(\text{L})_2]$ , which can correspond to coordination isomers and/or non-equivalent positions of the coordinated ligand. Signals of three forms A, B and C in  $^1\text{H}$  and  $^{13}\text{C}$  spectra are present for most carbon and hydrogen nuclei. It can be shown on the example of atoms 1 and 12 (see Figure 26). Nevertheless, sums of integral intensities of forms A, B and C are in agreement with the composition of the ligand.

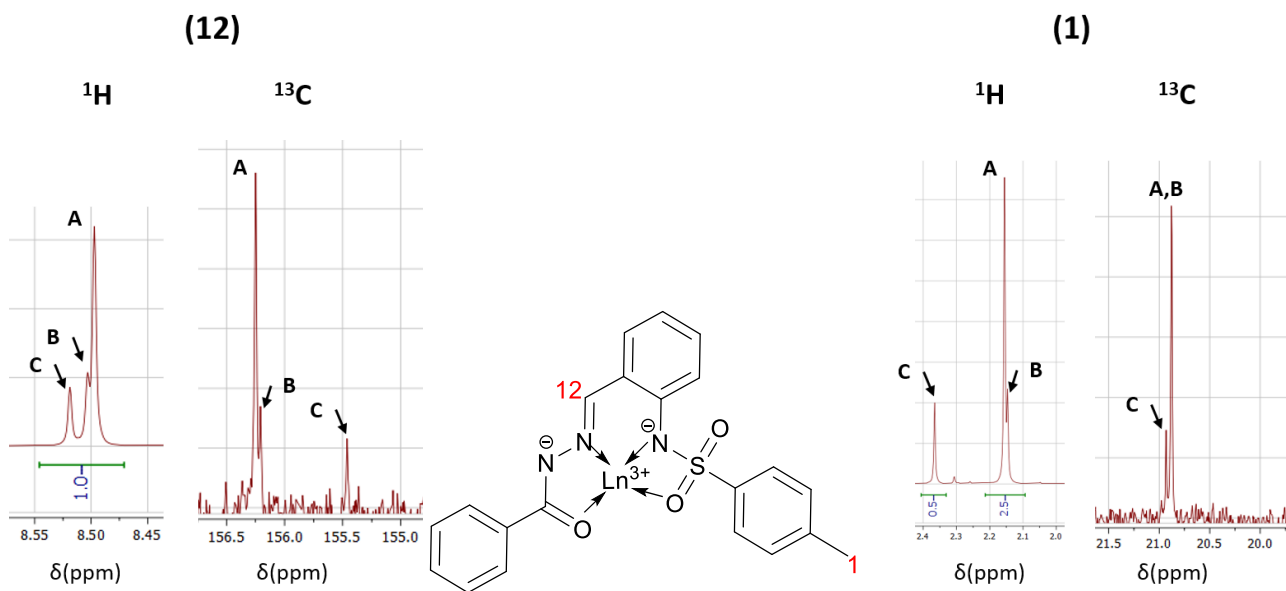

**Figure 26** Fragments of  $^1\text{H}$  and  $^{13}\text{C}$  NMR spectra of  $\text{K}(\text{H}_2\text{O})_3[\text{Lu}(\text{L})_2]$  in  $\text{DMSO-d}_6$  showing ligand forms A, B and C on the example of nuclei 1 and 12.

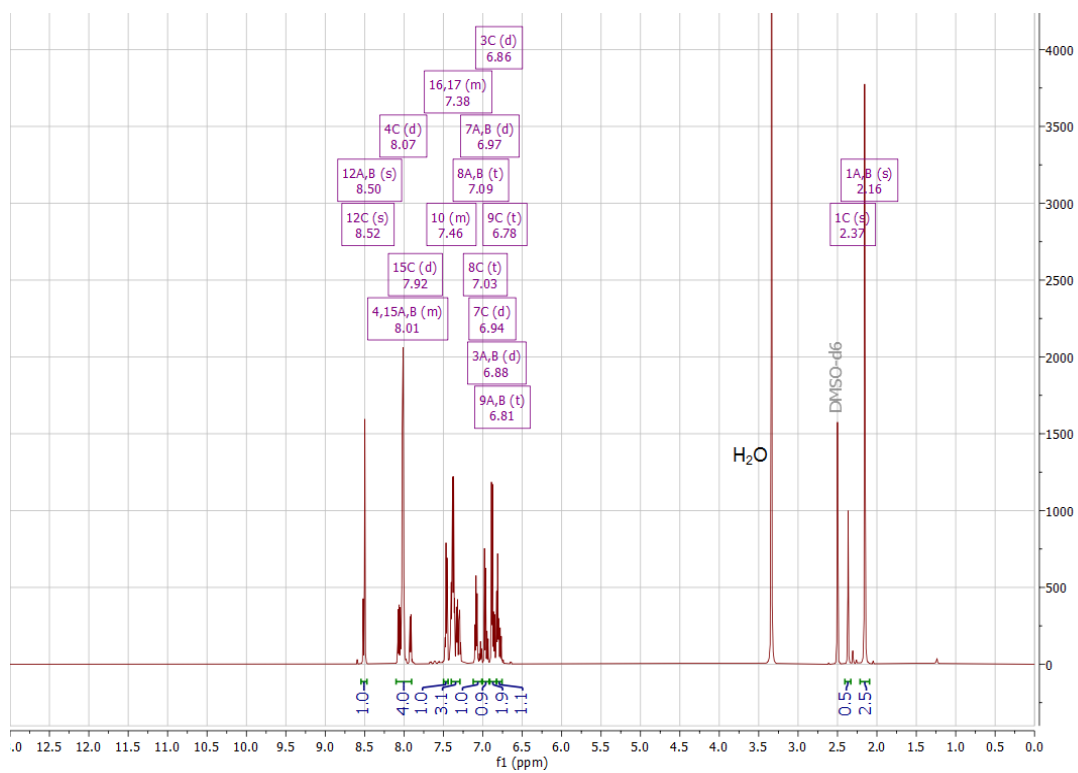

Figure 27  $^1\text{H}$  NMR spectrum of  $\text{K}(\text{H}_2\text{O})_3[\text{Lu}(\text{L})_2]$  in  $\text{DMSO-d}_6$ .

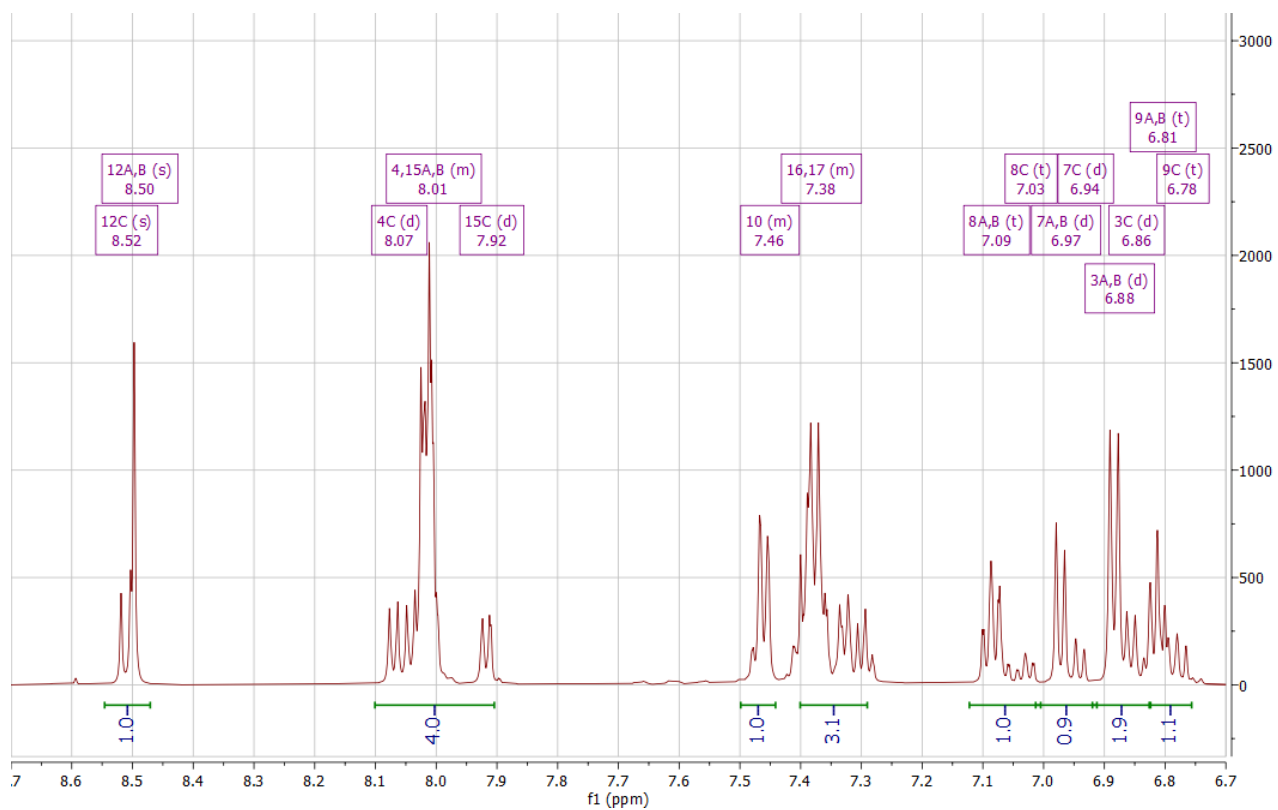

**Figure 28  $^1\text{H}$  NMR spectrum of  $\text{K}(\text{H}_2\text{O})_3[\text{Lu}(\text{L})_2]$  in  $\text{DMSO-d}_6$  in the range 6.7 – 8.7 ppm.**

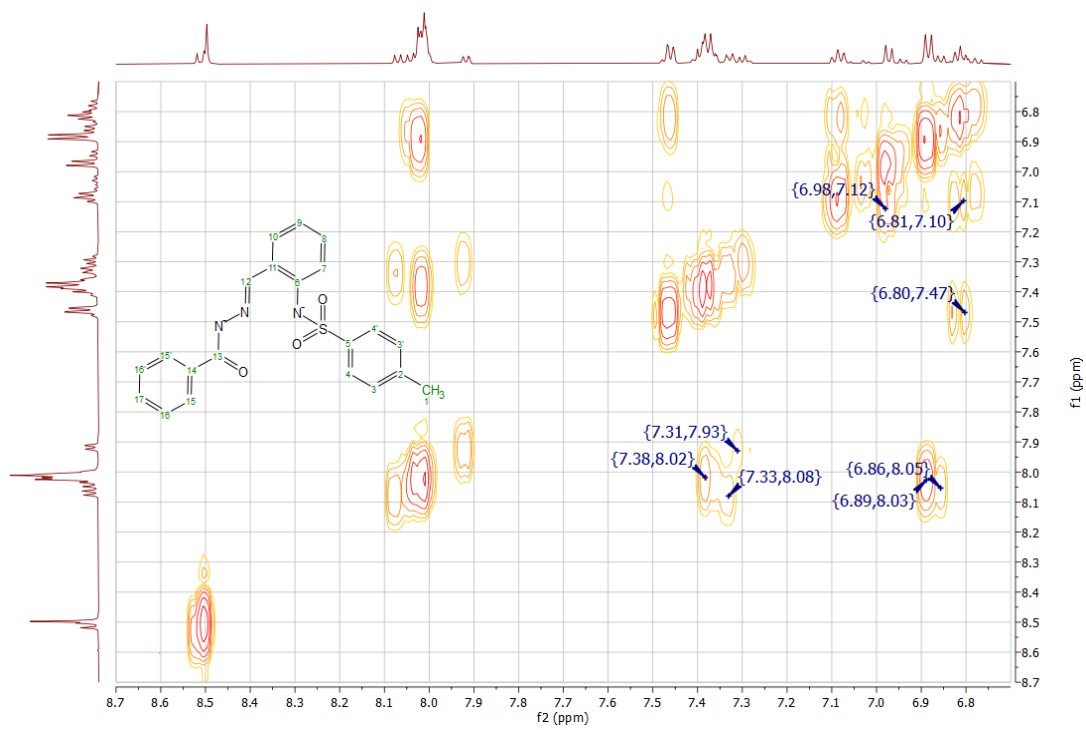

**Figure 29** Fragment of the COSY spectrum of  $K(H_2O)_3[Lu(L)_2]$  in  $DMSO-d_6$ .



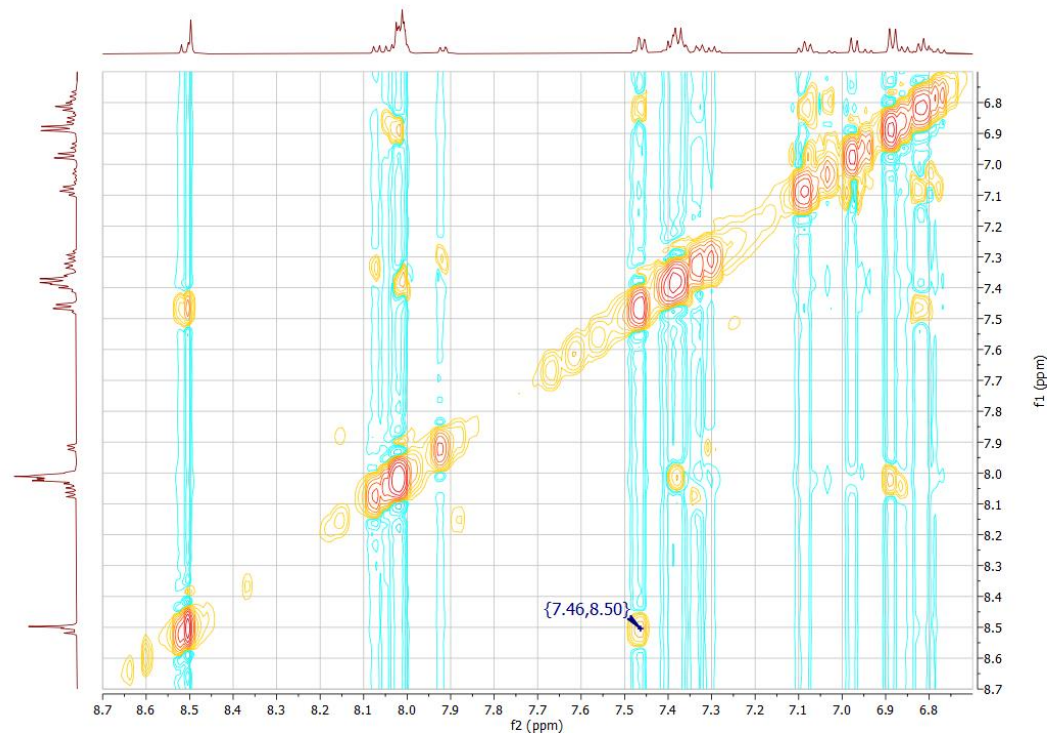

**Figure 30** Fragment of the NOESY spectrum of  $\text{K}(\text{H}_2\text{O})_3[\text{Lu}(\text{L})_2]$  in  $\text{DMSO-d}_6$ . For clearance, only interaction of protons 12-10, which brings additional to COSY spectrum information, is highlighted.

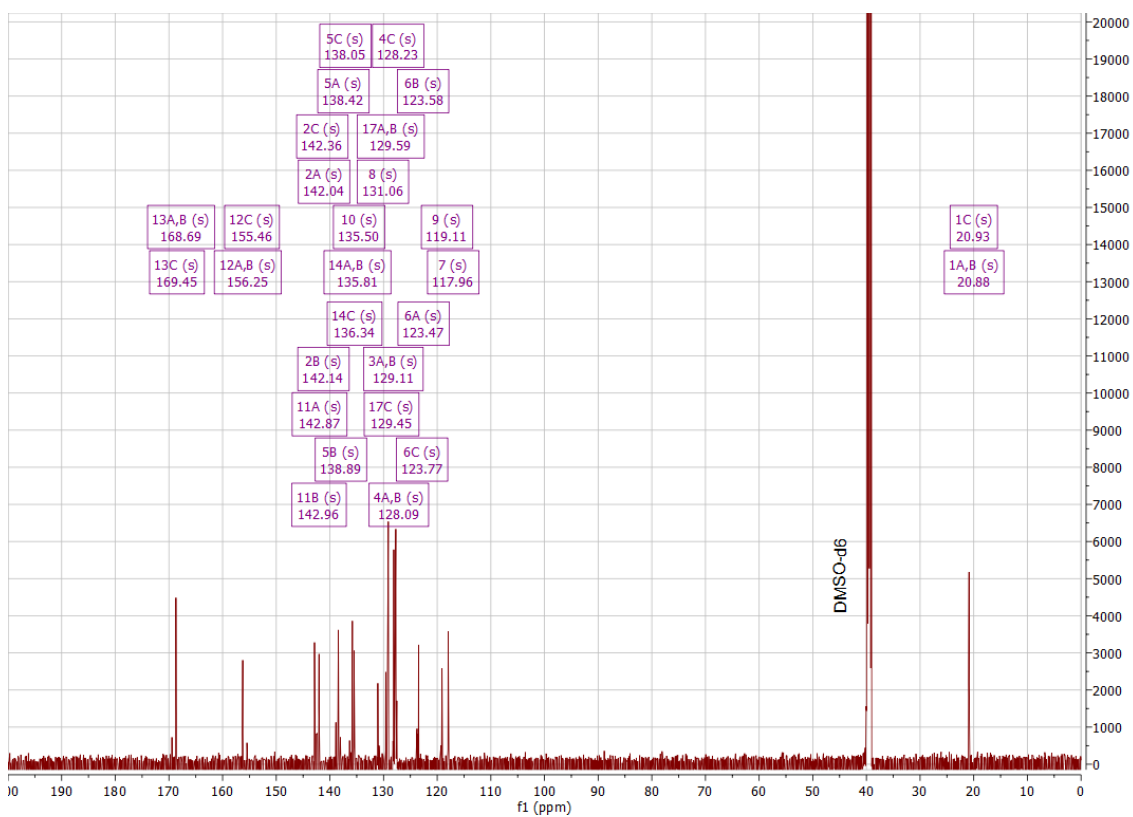

Figure 31  $^{13}\text{C}$  NMR spectrum of  $\text{K}(\text{H}_2\text{O})_3[\text{Lu}(\text{L})_2]$  in  $\text{DMSO-}d_6$ .

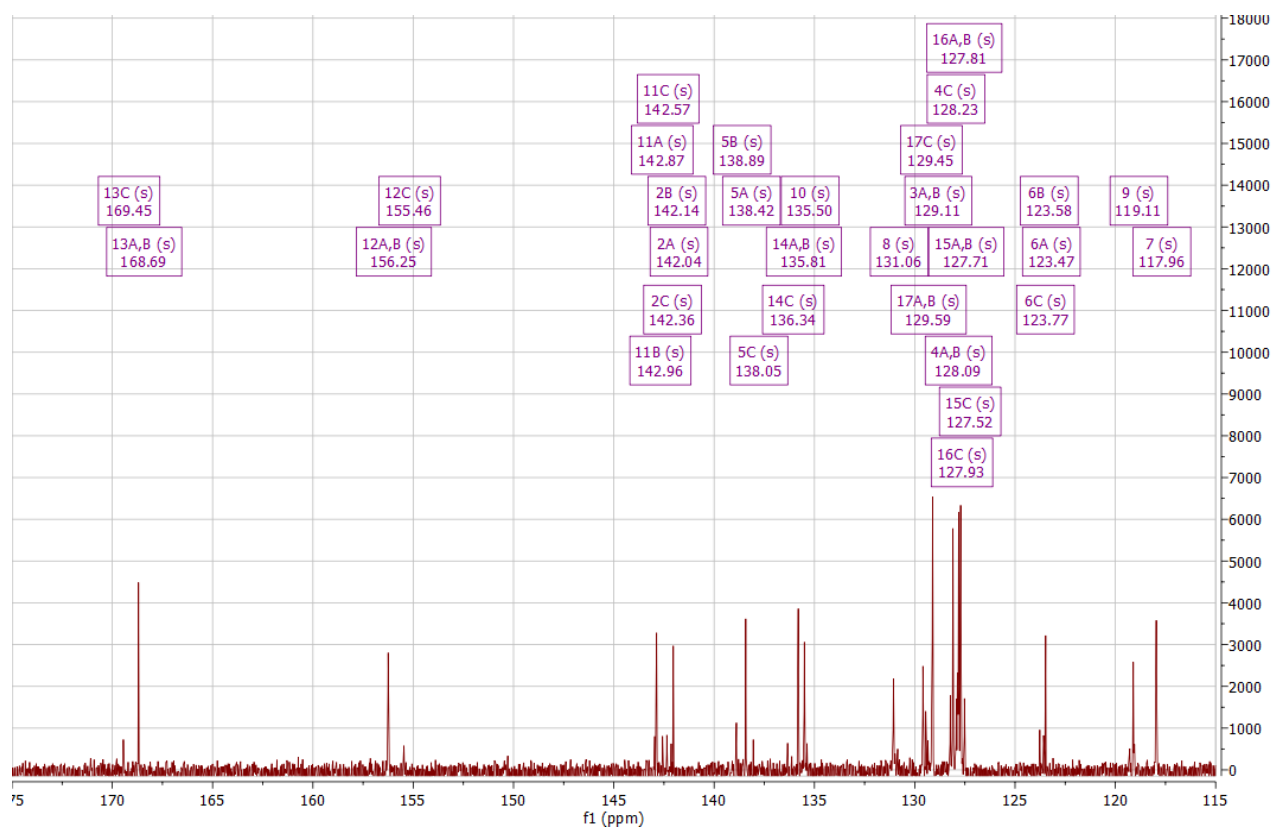

Figure 32 <sup>13</sup>C NMR spectrum of K(H<sub>2</sub>O)<sub>3</sub>[Lu(L)<sub>2</sub>] in DMSO-d<sub>6</sub> in the range 175 – 115 ppm.

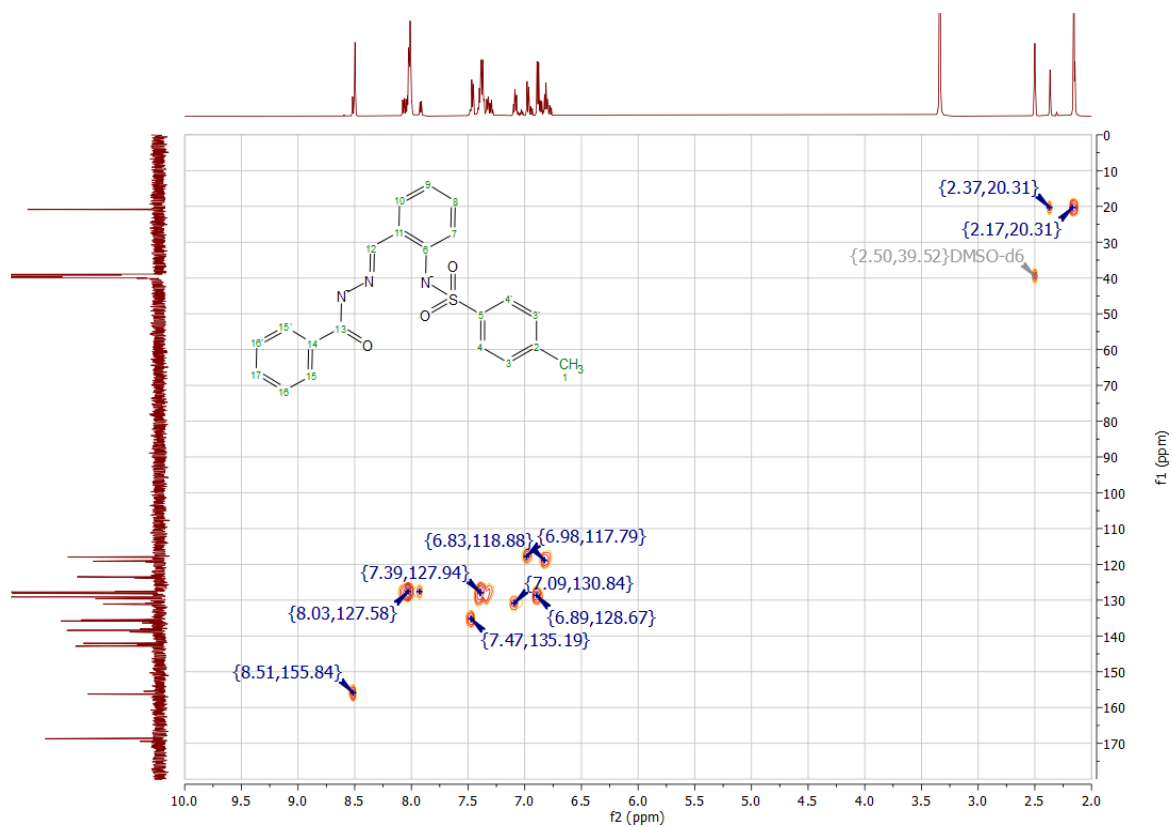

Figure 33 HSQC spectrum of  $K(H_2O)_3[Lu(L)_2]$  in DMSO-d<sub>6</sub>.

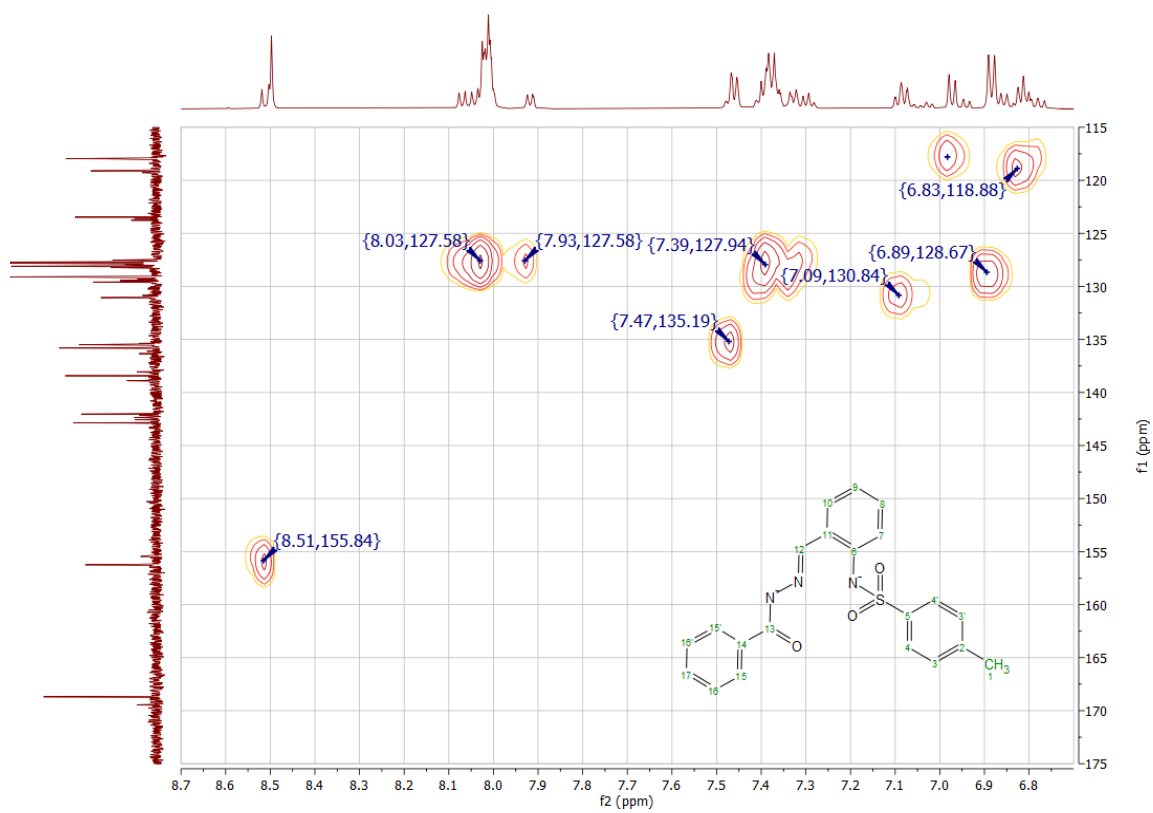

Figure 34 Fragment of  $K(H_2O)_3[Lu(L)_2]$  HSQC spectrum in  $DMSO-d_6$ .

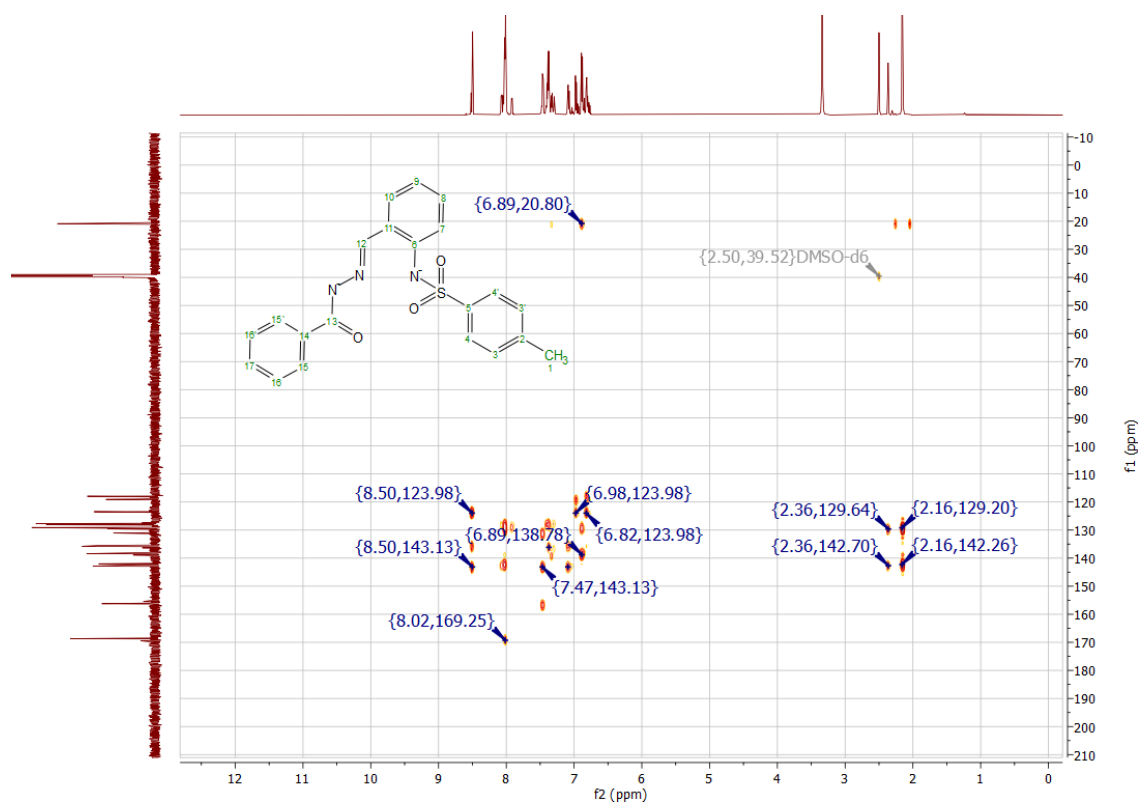

Figure 35 HMBC spectrum of  $K(H_2O)_3[Lu(L)_2]$  in  $DMSO-d_6$ .

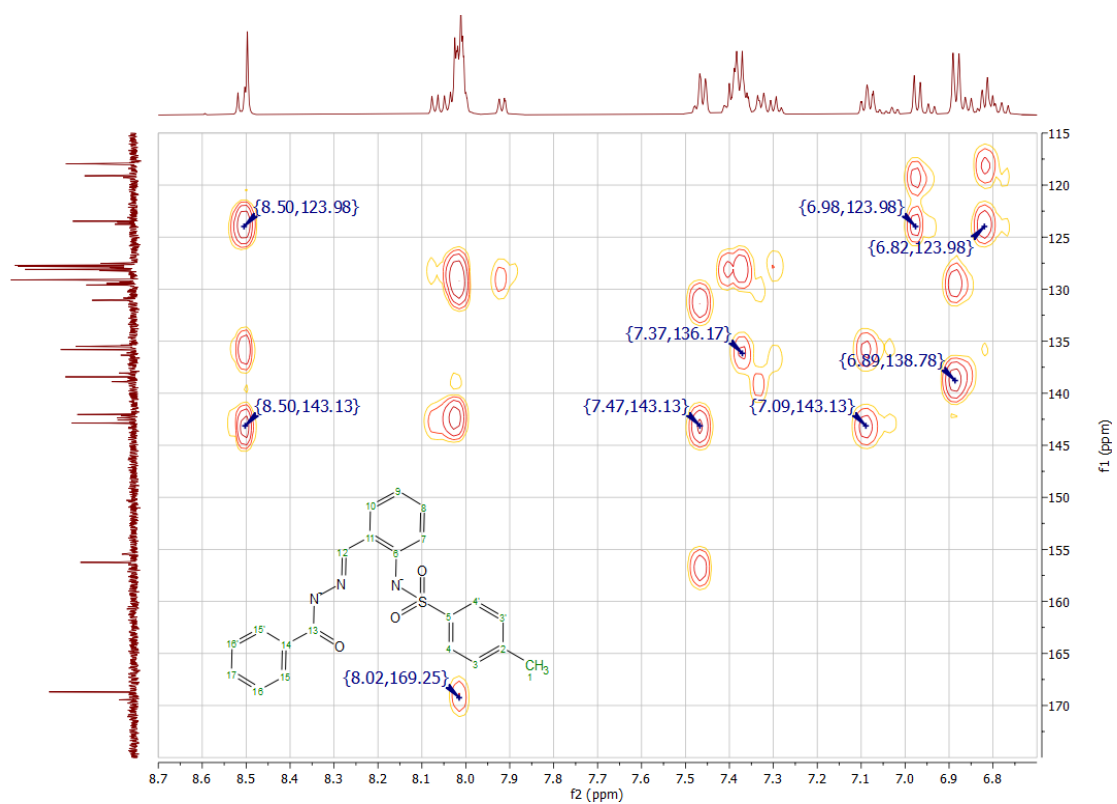

**Figure 36** Fragment of  $K(H_2O)_3[Lu(L)_2]$  HMBC spectrum in  $DMSO-d_6$ . For clearance, only interactions which bring additional to HSQC spectrum information are highlighted.

## Spectra of Lu(L)(HL)

In DMSO, Lu(L)(HL) dissociate according to the reaction (see reaction (2) in the main text):

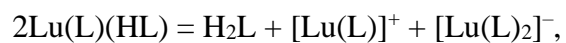

thus, in its NMR spectra signals of H<sub>2</sub>L, [Lu(L)]<sup>+</sup> and [Lu(L)<sub>2</sub>]<sup>-</sup> are present.



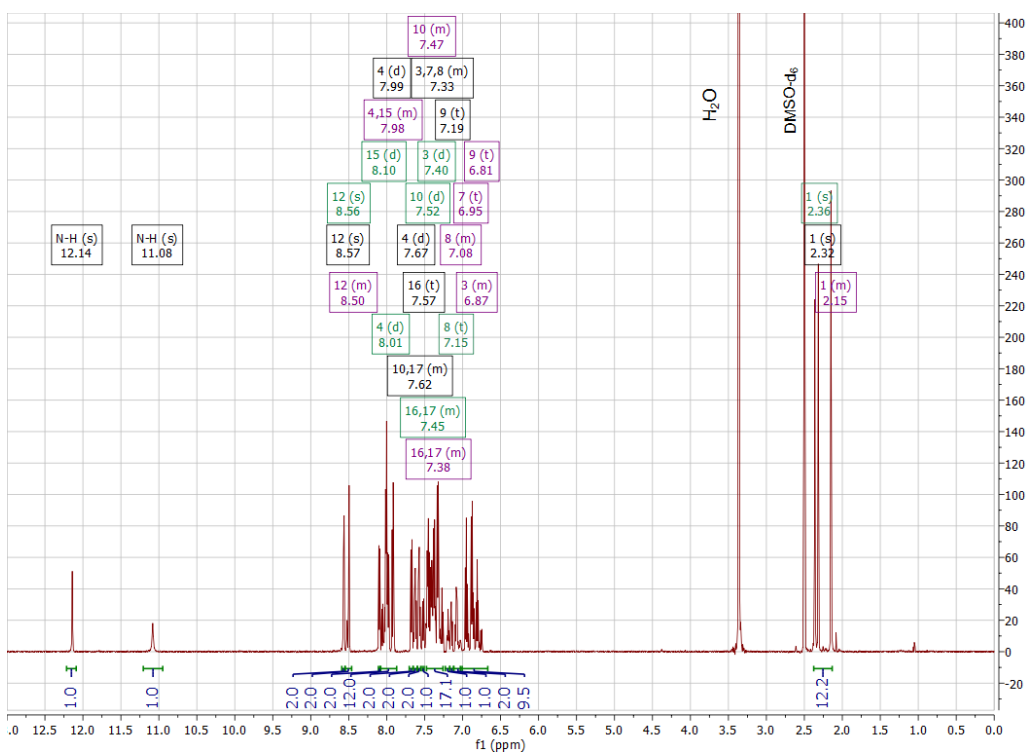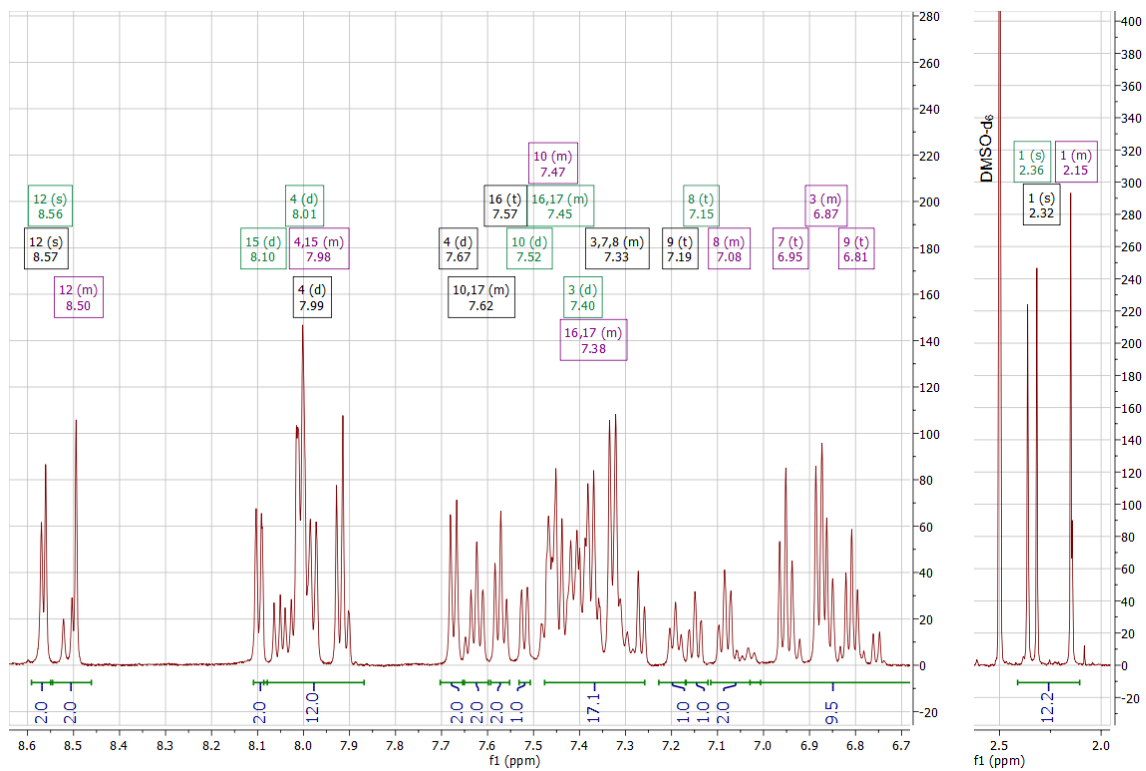

**Figure 37** <sup>1</sup>H spectrum of Lu(L)(HL) in DMSO-d<sub>6</sub>. H<sub>2</sub>L signals are black, [LuL]<sup>+</sup> signals are green and [Lu(L)<sub>2</sub>]<sup>-</sup> signals are violet.

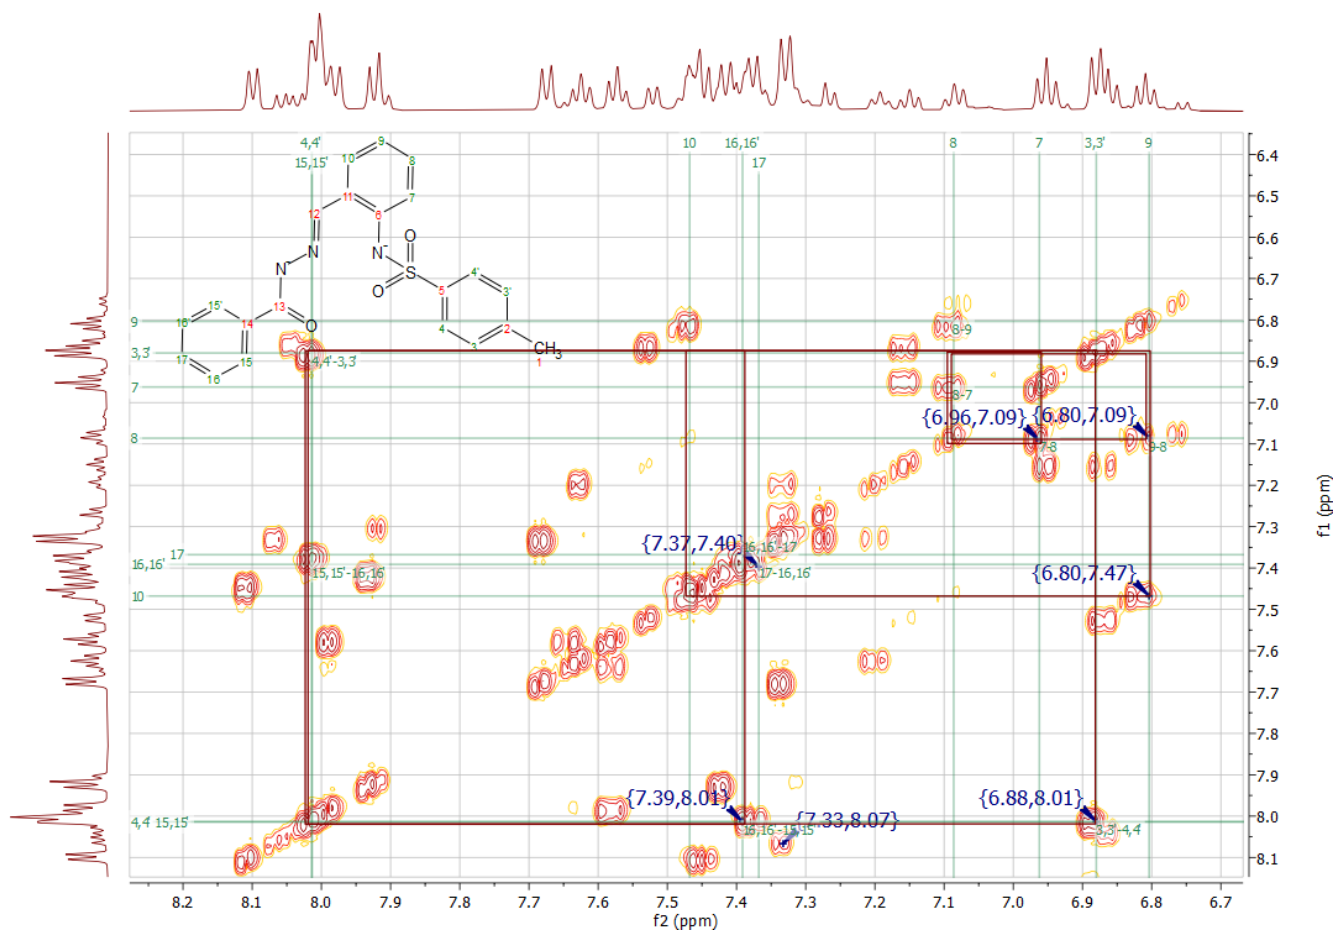

**Figure 38** Fragment of the COSY spectrum of Lu(L)(HL) in DMSO-d<sub>6</sub>. For clearance, only signals of [Lu(L)<sub>2</sub>]<sup>-</sup> are highlighted.

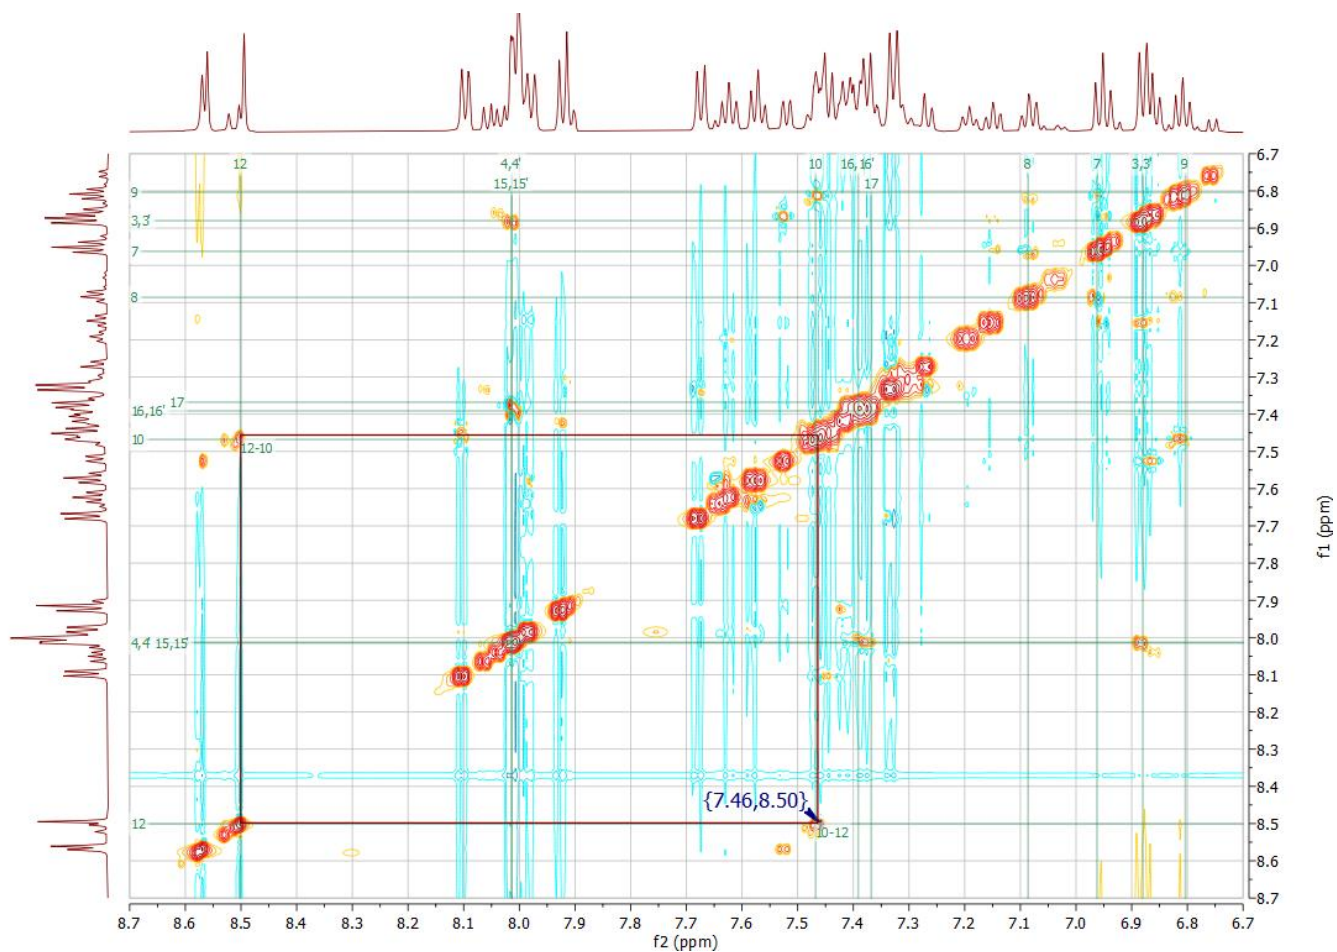

**Figure 39** Fragment of the NOESY spectrum of Lu(L)(HL) in DMSO-d<sub>6</sub>. For clearance, only signals of [Lu(L)<sub>2</sub>]<sup>-</sup> which bring information additional to <sup>1</sup>H and COSY spectra are highlighted.

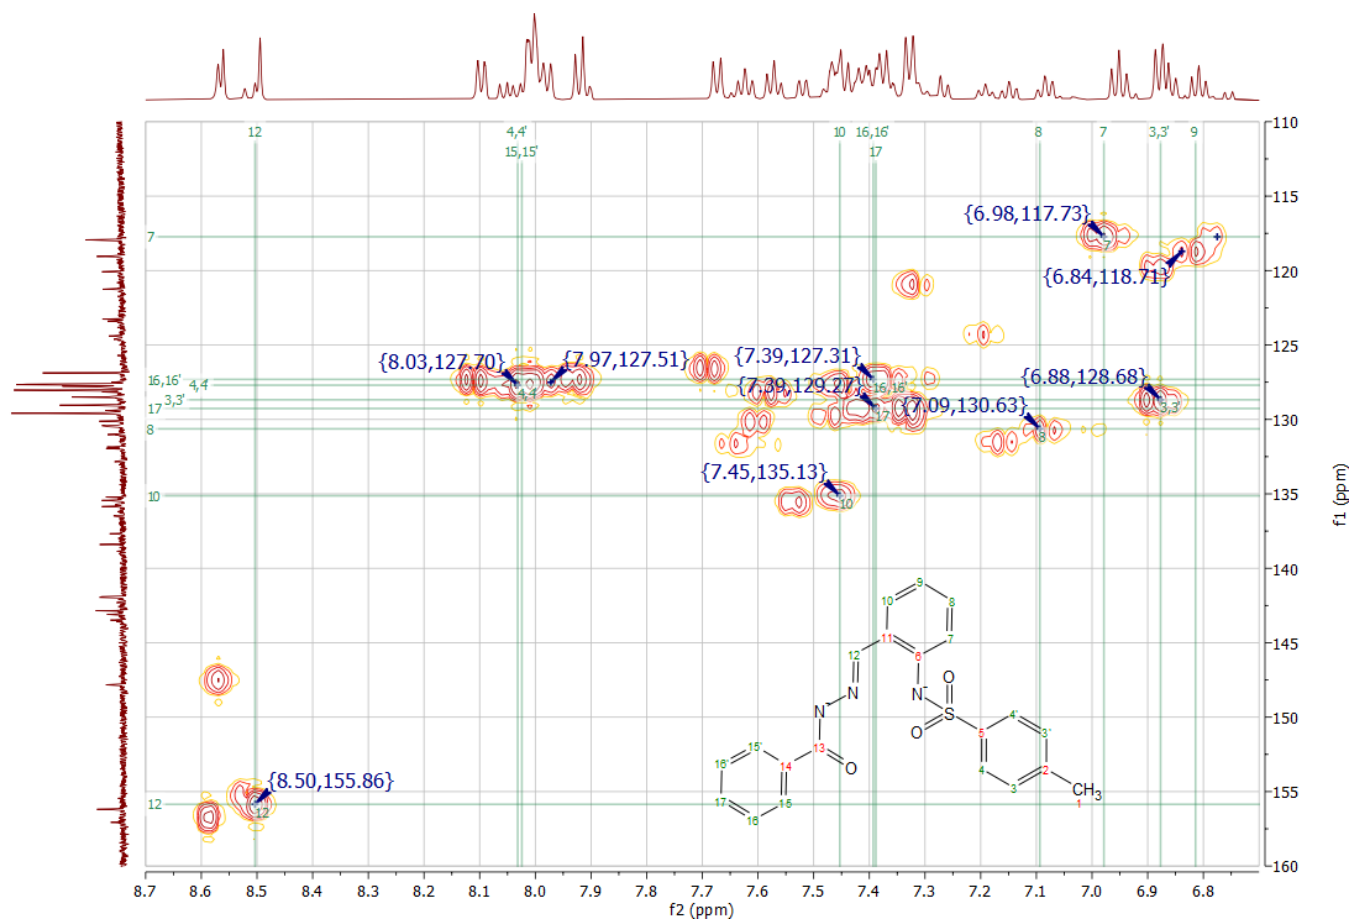

**Figure 40 HMQC spectrum of Lu(L)(HL) in DMSO-d<sub>6</sub>. For clearance, only signals of [Lu(L)<sub>2</sub>]<sup>-</sup> are highlighted.**

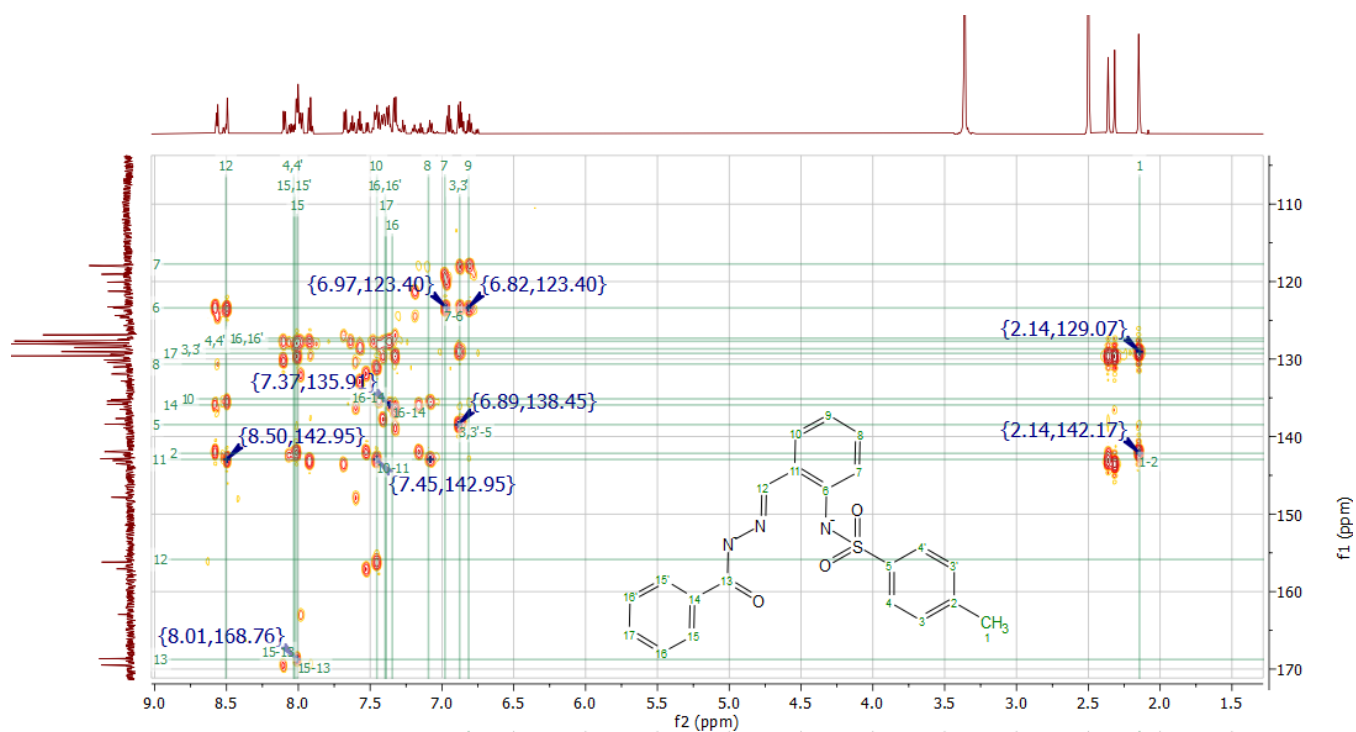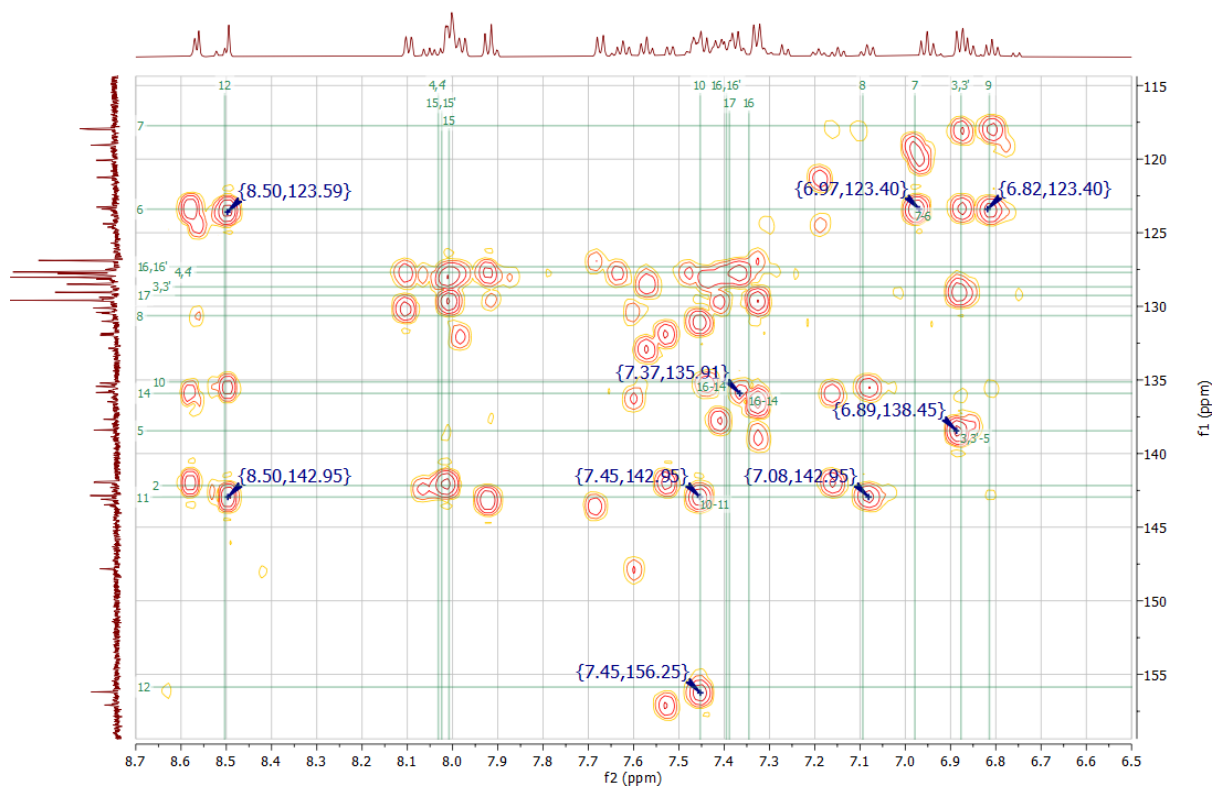

Figure 41 HMBC spectrum of Lu(L)(HL) in DMSO-d<sub>6</sub>. For clearance, only signals of [Lu(L)<sub>2</sub>]<sup>+</sup> which bring additional to HMQC spectrum information are highlighted.

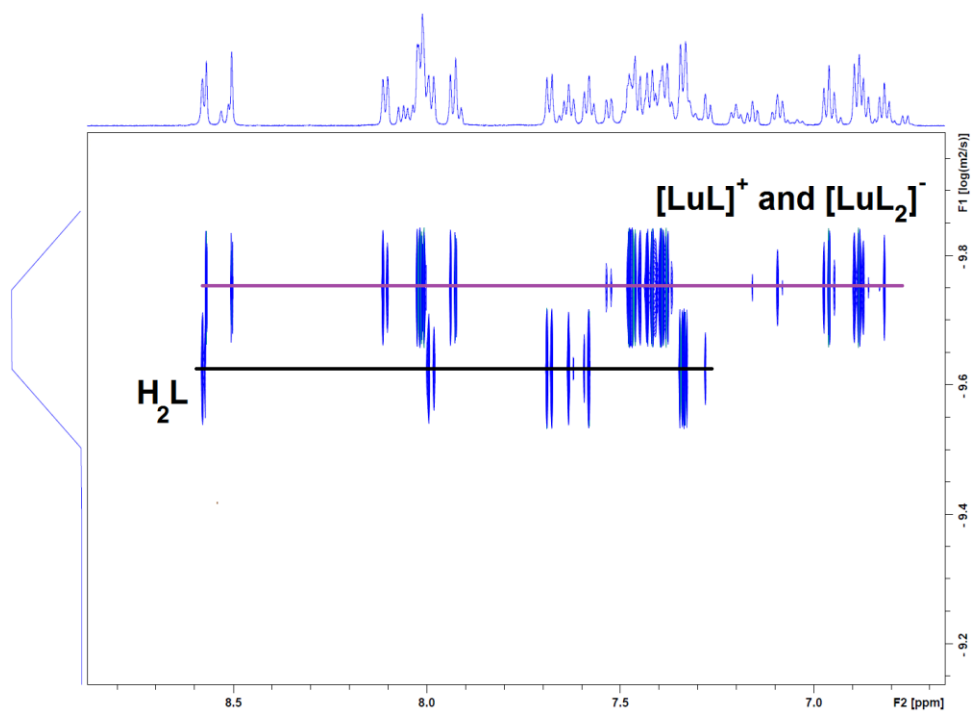

**Figure 42** DOSY spectrum of Lu(L)(HL) in DMSO-d<sub>6</sub>.

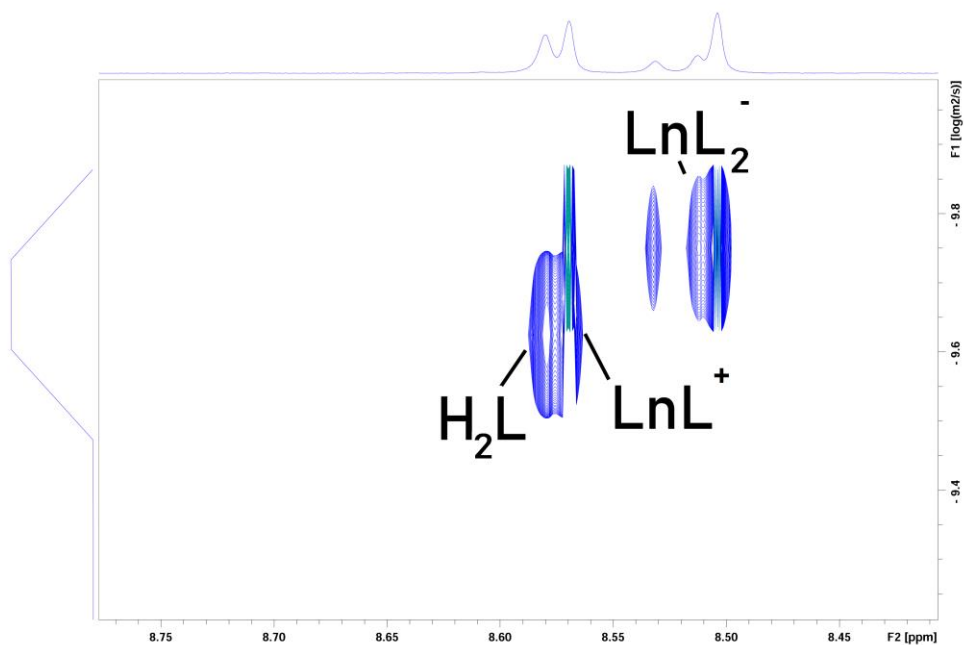

**Figure 43** DOSY spectrum of  $Lu(L)(HL)$  in  $DMSO-d_6$  in the range 8.80 – 8.40 ppm showing signals of protons 12.

## Spectra of Yb(HL)<sub>2</sub>Cl

In DMSO, Yb(HL)<sub>2</sub>Cl dissociate according to the reaction (see the reaction (1) in the main text):

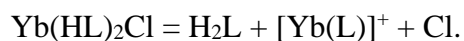

Thus, in its NMR spectra, signals of both H<sub>2</sub>L and [Yb(L)]<sup>+</sup> are presented.

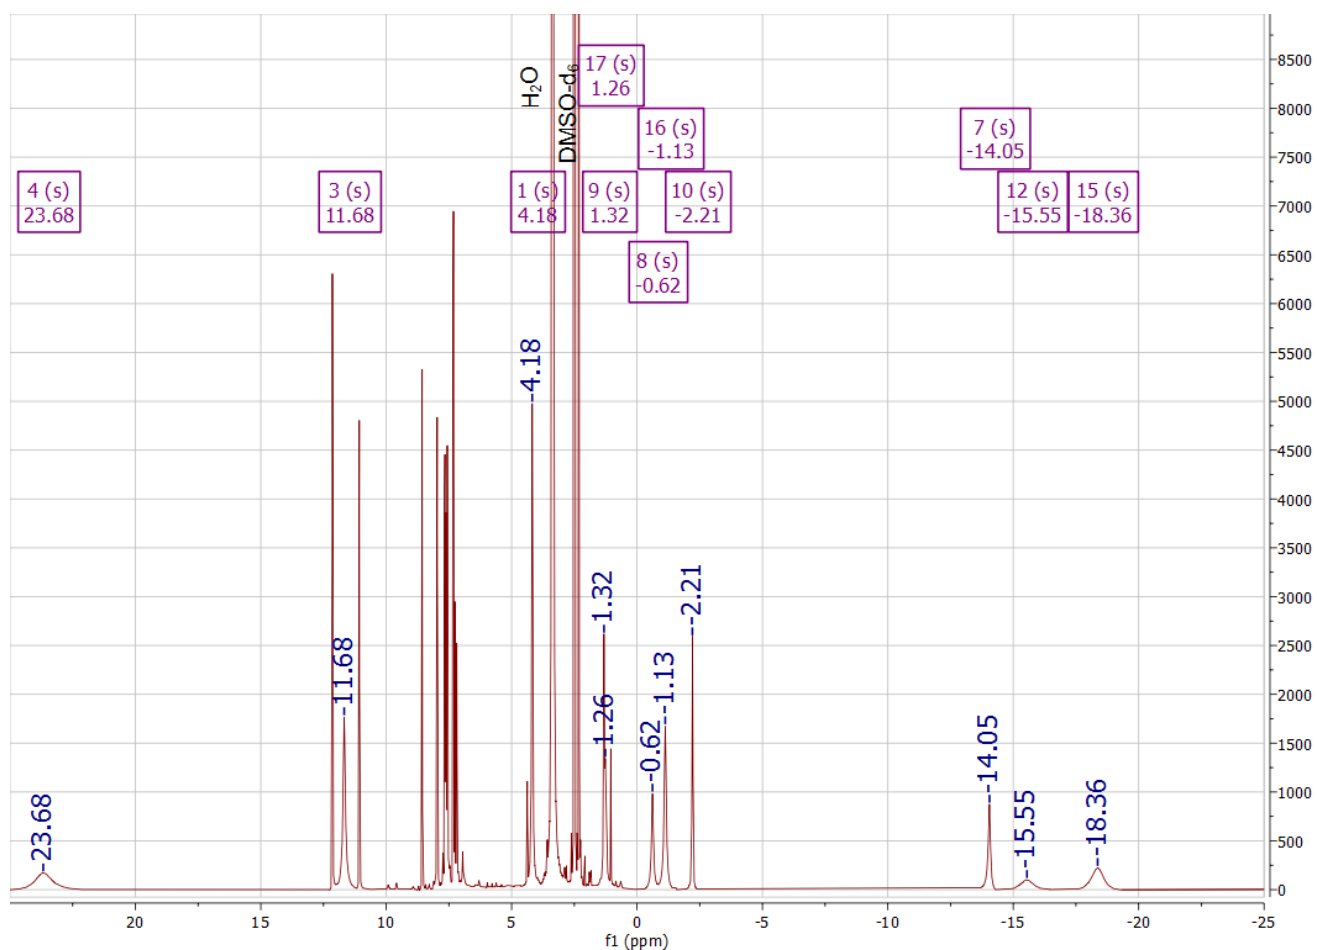

**Figure 44** <sup>1</sup>H spectrum of Yb(HL)<sub>2</sub>Cl in DMSO-d<sub>6</sub>. For clearance, only signals of [Yb(L)]<sup>+</sup> are named.
